# Supplementary material for: The causality of borrowing: Lexical loans in Eurasian languages
Source: PLoS One. 2019 Oct 30;14(10):e0223588. doi: 10.1371/journal.pone.0223588 (PMC6821065; doi:10.1371/journal.pone.0223588)
Supplement: S2 Appendix — (XLSX) [file pone.0223588.s002.xlsx]

## Sheet: Blad1
Lexeme_ID	Lang_Name	Family	Lang_ID	Lang_Reliability	Time_period	Word_Transcription	Word_Meaning	Grammatical_Data	Classification_DB_Name	Classification_Stats_Name	Word_List_Item	TopNode_Lexeme_ID	TopNode_Transcription	Reliability	Borrowed	Source_Language
91178	Abaza	Northwest Caucasian	68466	Modern language	Modern	j-čʰwaɣwa-ra	plow		Activities	ACTIVITIES	TO PLOW	92514	plow-1	Derivation	No loan
91170	Abaza	Northwest Caucasian	68466	Modern language	Modern	ax-ra	sew		Activities	ACTIVITIES	TO SEW				No loan
91171	Abaza	Northwest Caucasian	68466	Modern language	Modern	k'arsa-ra	sow		Activities	ACTIVITIES	TO SOW				No loan
91172	Abaza	Northwest Caucasian	68466	Modern language	Modern	xəxa-ra	spin (thread)		Activities	ACTIVITIES	TO SPIN (THREAD)				No loan
91173	Abaza	Northwest Caucasian	68466	Modern language	Modern	ala-pʰa-ra	weave		Activities	ACTIVITIES	TO WEAVE				No loan
91192	Abaza	Northwest Caucasian	68466	Modern language	Modern	čʰwə	bull		Farm animals	CATTLE	BULL				No loan
91195	Abaza	Northwest Caucasian	68466	Modern language	Modern	raxw	cattle		Farm animals	CATTLE	CATTLE				No loan
91194	Abaza	Northwest Caucasian	68466	Modern language	Modern	šamaq'i	cattle		Farm animals	CATTLE	CATTLE				No loan
91197	Abaza	Northwest Caucasian	68466	Modern language	Modern	žwə	cow		Farm animals	CATTLE	COW	92064	cow-1	Inherited	No loan
91185	Abaza	Northwest Caucasian	68466	Modern language	Modern	bacʰa	flax		Crops & fruit	CROPS	FLAX				No loan
91186	Abaza	Northwest Caucasian	68466	Modern language	Modern	cʰəra	grain (generic)		Crops & fruit	CROPS	GRAIN (GENERIC)				No loan
91188	Abaza	Northwest Caucasian	68466	Modern language	Modern	kʰʲar	oats		Crops & fruit	CROPS	OATS				No loan
91189	Abaza	Northwest Caucasian	68466	Modern language	Modern	žit'a	rye		Crops & fruit	CROPS	RYE				No loan
91190	Abaza	Northwest Caucasian	68466	Modern language	Modern	čʰə-ωw-ra	wheat		Crops & fruit	CROPS	WHEAT				No loan
91193	Abaza	Northwest Caucasian	68466	Modern language	Modern	cʰgwə	cat		Farm animals	DOMESTIC ANIMALS	CAT	92054	cat-1	Inherited	No loan
91198	Abaza	Northwest Caucasian	68466	Modern language	Modern	la	dog		Farm animals	DOMESTIC ANIMALS	DOG				No loan
91191	Abaza	Northwest Caucasian	68466	Modern language	Modern	šʲxa	bee		Farm animals	DOMESTIC INSECTS	BEE	92048	bee-1	Inherited	No loan
91199	Abaza	Northwest Caucasian	68466	Modern language	Modern	čʰada	donkey		Farm animals	DRAFT ANIMALS	DONKEY				No loan
91203	Abaza	Northwest Caucasian	68466	Modern language	Modern	čʰə	horse		Farm animals	DRAFT ANIMALS	HORSE	92089	horse-4	Inherited	No loan
91205	Abaza	Northwest Caucasian	68466	Modern language	Modern	čʰwə	ox		Farm animals	DRAFT ANIMALS	OX				No loan
91220	Abaza	Northwest Caucasian	68466	Modern language	Modern	cʰxa-r-ʒə	mead		Products	DRINK AND DRUGS	MEAD				No loan
91224	Abaza	Northwest Caucasian	68466	Modern language	Modern	ωwə	wine		Products	DRINK AND DRUGS	WINE				No loan
91244	Abaza	Northwest Caucasian	68466	Modern language	Modern	ħwa	wild pig		Wild animals	GAME ANIMALS	WILD BOAR	92100	pig-3	Unspecified	No loan
91235	Abaza	Northwest Caucasian	68466	Modern language	Modern	hwəspʰa	knife		Weapons etc.	IMPLEMENTS	KNIFE				No loan
91179	Abaza	Northwest Caucasian	68466	Modern language	Modern	xan	saw		Cultural artefacts & tools	IMPLEMENTS	SAW				No loan
91180	Abaza	Northwest Caucasian	68466	Modern language	Modern	čʰbəg	scythe		Cultural artefacts & tools	IMPLEMENTS	SCYTHE				No loan
91181	Abaza	Northwest Caucasian	68466	Modern language	Modern	xšʲrəpʰ	sickle		Cultural artefacts & tools	IMPLEMENTS	SICKLE				No loan
91182	Abaza	Northwest Caucasian	68466	Modern language	Modern	bel	spade		Cultural artefacts & tools	IMPLEMENTS	SPADE				Loan	?
91221	Abaza	Northwest Caucasian	68466	Modern language	Modern	žʲə	meat		Products	MATERIALS	MEAT				No loan
91213	Abaza	Northwest Caucasian	68466	Modern language	Modern	čʰwa-žʲ, čʰwa	leather		Metals & materials	MATERIALS	LEATHER	93084	leather-1	Inherited	No loan
91218	Abaza	Northwest Caucasian	68466	Modern language	Modern	š:a	grease		Products	MATERIALS	GREASE				No loan
91215	Abaza	Northwest Caucasian	68466	Modern language	Modern	haqwə	stone		Metals & materials	MATERIALS	STONE				No loan
91216	Abaza	Northwest Caucasian	68466	Modern language	Modern	c'la	wood		Metals & materials	MATERIALS	WOOD				No loan
91210	Abaza	Northwest Caucasian	68466	Modern language	Modern	ωwa, ωwat'a	copper		Metals & materials	METALS	COPPER	93075	copper-5	Inherited	No loan
91211	Abaza	Northwest Caucasian	68466	Modern language	Modern	χa-pʰšʲ	gold		Metals & materials	METALS	GOLD	93074	copper-4	Derivation	No loan
91212	Abaza	Northwest Caucasian	68466	Modern language	Modern	ajxa	iron		Metals & materials	METALS	IRON				No loan
91214	Abaza	Northwest Caucasian	68466	Modern language	Modern	rəzna	silver		Metals & materials	METALS	SILVER	93076	copper-6	Inherited	No loan
91206	Abaza	Northwest Caucasian	68466	Modern language	Modern	ħwa	pig		Farm animals	PIG RAISING	PIG	92100	pig-3	Inherited	No loan
91207	Abaza	Northwest Caucasian	68466	Modern language	Modern	ħwačʰər	piglet		Farm animals	PIG RAISING	PIGLET	92100	pig-3	Derivation	No loan
91196	Abaza	Northwest Caucasian	68466	Modern language	Modern	kʰwč'ə-s	chicken		Farm animals	POULTRY	CHICKEN				No loan
91200	Abaza	Northwest Caucasian	68466	Modern language	Modern	babəšʲ	duck		Farm animals	POULTRY	DUCK				No loan
91202	Abaza	Northwest Caucasian	68466	Modern language	Modern	k'wt'əw	hen		Farm animals	POULTRY	HEN	92087	hen-4	Inherited	No loan
91239	Abaza	Northwest Caucasian	68466	Modern language	Modern	mšwə	bear		Wild animals	PREDATOR ANIMALS	BEAR	93473	bear-1	Inherited	No loan
91242	Abaza	Northwest Caucasian	68466	Modern language	Modern	asljan	lion		Wild animals	PREDATOR ANIMALS	LION				Loan	?
91243	Abaza	Northwest Caucasian	68466	Modern language	Modern	matʰə	snake		Wild animals	PREDATOR ANIMALS	SNAKE	93487	snake-2	Inherited	No loan
91245	Abaza	Northwest Caucasian	68466	Modern language	Modern	kʰwəǯʲma	wolf		Wild animals	PREDATOR ANIMALS	WOLF	92069	dog-1	Inherited	No loan
91241	Abaza	Northwest Caucasian	68466	Modern language	Modern	baga	fox		Wild animals	PREDATOR ANIMALS	FOX	93474	bear-2	Inherited	No loan
91240	Abaza	Northwest Caucasian	68466	Modern language	Modern	a-warba	eagle		Wild animals	PREDATOR BIRDS	EAGLE				No loan
91219	Abaza	Northwest Caucasian	68466	Modern language	Modern	cʰxa	honey		Products	PRODUCTS	HONEY				No loan
91222	Abaza	Northwest Caucasian	68466	Modern language	Modern	xšə	milk		Products	PRODUCTS	MILK				No loan
91223	Abaza	Northwest Caucasian	68466	Modern language	Modern	ǯʲək'a	salt		Products	PRODUCTS	SALT				No loan
91217	Abaza	Northwest Caucasian	68466	Modern language	Modern	čʰwa-ba	beeswax		Products	PRODUCTS	WAX (BEES)				No loan
91226	Abaza	Northwest Caucasian	68466	Modern language	Modern	qwə	wool		Products	PRODUCTS	WOOL				No loan
91225	Abaza	Northwest Caucasian	68466	Modern language	Modern	lasa	wool		Products	PRODUCTS	WOOL	92846	wool-1	Inherited	No loan
91227	Abaza	Northwest Caucasian	68466	Modern language	Modern	ʒnə	autumn / harvest		Seasons	SEASONS	AUTUMN				No loan
91227	Abaza	Northwest Caucasian	68466	Modern language	Modern	ʒnə	autumn / harvest		Seasons	SEASONS	HARVEST				No loan
91228	Abaza	Northwest Caucasian	68466	Modern language	Modern	ωapʰnə	spring		Seasons	SEASONS	SPRING	93804	spring-1	Inherited	No loan
91229	Abaza	Northwest Caucasian	68466	Modern language	Modern	pʰxnə	summer		Seasons	SEASONS	SUMMER				No loan
91230	Abaza	Northwest Caucasian	68466	Modern language	Modern	ɣnə	winter		Seasons	SEASONS	WINTER				No loan
91201	Abaza	Northwest Caucasian	68466	Modern language	Modern	ǯʲma	goat		Farm animals	SMALL CATTLE	GOAT	92078	goat-1	Inherited	No loan
91204	Abaza	Northwest Caucasian	68466	Modern language	Modern	səs	lamb		Farm animals	SMALL CATTLE	LAMB				No loan
91208	Abaza	Northwest Caucasian	68466	Modern language	Modern	wasa	ram		Farm animals	SMALL CATTLE	RAM				No loan
91209	Abaza	Northwest Caucasian	68466	Modern language	Modern	wasa	sheep		Farm animals	SMALL CATTLE	SHEEP				No loan
91176	Abaza	Northwest Caucasian	68466	Modern language	Modern	rkʰa, rqa	cultivated field		Cultural artefacts & tools	TILLAGE	CULTIVATED FIELD	92511	field-1	Inherited	No loan
91178	Abaza	Northwest Caucasian	68466	Modern language	Modern	j-čʰwaɣwa-ra	plow		Cultural artefacts & tools	TILLAGE	PLOW (N)	92514	plow-1	Derivation	No loan
91231	Abaza	Northwest Caucasian	68466	Modern language	Modern	rə	army		Weapons etc.	WEAPONS	ARMY	93883	army-1	Inherited	No loan
91232	Abaza	Northwest Caucasian	68466	Modern language	Modern	xrəxəcʰ	arrow		Weapons etc.	WEAPONS	ARROW				No loan
91175	Abaza	Northwest Caucasian	68466	Modern language	Modern	k'waɣa	axe, battle axe		Cultural artefacts & tools	WEAPONS	AXE	92508	axe-1	Inherited	No loan
91234	Abaza	Northwest Caucasian	68466	Modern language	Modern	xrəxəcʰ	bow		Weapons etc.	WEAPONS	BOW				No loan
91236	Abaza	Northwest Caucasian	68466	Modern language	Modern	daǯʲ	shield		Weapons etc.	WEAPONS	SHIELD				No loan
91237	Abaza	Northwest Caucasian	68466	Modern language	Modern	bəžʲpʰəgʲ	spear		Weapons etc.	WEAPONS	SPEAR				No loan
91238	Abaza	Northwest Caucasian	68466	Modern language	Modern	ahwa	sword		Weapons etc.	WEAPONS	SWORD				No loan
91187	Abaza	Northwest Caucasian	68466	Modern language	Modern	ǯʲwəzəm	grape		Crops & fruit	VEGETABLES & FRUIT	GRAPE				No loan
91183	Abaza	Northwest Caucasian	68466	Modern language	Modern	čʰarx	wheel		Cultural artefacts & tools	VEHICLES	WHEEL				Loan	?
91184	Abaza	Northwest Caucasian	68466	Modern language	Modern	pʰsənčʰ	yoke		Cultural artefacts & tools	VEHICLES	YOKE				No loan
596	Abkhaz	Northwest Caucasian	58800	Modern language	Modern	a-cʷa-ɣʷa-ra	plow		Activities	ACTIVITIES	TO PLOW	92514	plow-1	Derivation	No loan
595	Abkhaz	Northwest Caucasian	58800	Modern language	Modern	a-ʒaχ-ra	sew		Activities	ACTIVITIES	TO SEW				Loan	Georgian
597	Abkhaz	Northwest Caucasian	58800	Modern language	Modern	a-la-c'a-ra	sow		Activities	ACTIVITIES	TO SOW				No loan
594	Abkhaz	Northwest Caucasian	58800	Modern language	Modern	a-s-ra	spin (thread)		Activities	ACTIVITIES	TO SPIN (THREAD)				No loan
593	Abkhaz	Northwest Caucasian	58800	Modern language	Modern	a-s-ra	weave		Activities	ACTIVITIES	TO WEAVE				No loan
552	Abkhaz	Northwest Caucasian	58800	Modern language	Modern	a-cʷ	bull		Farm animals	CATTLE	BULL				No loan
555	Abkhaz	Northwest Caucasian	58800	Modern language	Modern	a-ħajwan	cattle		Farm animals	CATTLE	CATTLE				Loan	Turkic (family)
553	Abkhaz	Northwest Caucasian	58800	Modern language	Modern	a-žʷ	cow		Farm animals	CATTLE	COW	92064	cow-1	Inherited	No loan
606	Abkhaz	Northwest Caucasian	58800	Modern language	Modern	a-kʷʰnə	flax		Crops & fruit	CROPS	FLAX				No loan
602	Abkhaz	Northwest Caucasian	58800	Modern language	Modern	a-rə-c	grain (generic)		Crops & fruit	CROPS	GRAIN (GENERIC)				No loan
601	Abkhaz	Northwest Caucasian	58800	Modern language	Modern	a-kʲʰar	oats		Crops & fruit	CROPS	OATS				Loan	Georgian
600	Abkhaz	Northwest Caucasian	58800	Modern language	Modern	a-č'ia	rye		Crops & fruit	CROPS	RYE				Loan	Georgian
598	Abkhaz	Northwest Caucasian	58800	Modern language	Modern	a-ča	wheat		Crops & fruit	CROPS	WHEAT				No loan
599	Abkhaz	Northwest Caucasian	58800	Modern language	Modern	a-kʲʰar	barley		Crops & fruit	CROPS	BARLEY				Loan	Georgian
569	Abkhaz	Northwest Caucasian	58800	Modern language	Modern	a-cgʷə	cat		Farm animals	DOMESTIC ANIMALS	CAT	92054	cat-1	Inherited	No loan
568	Abkhaz	Northwest Caucasian	58800	Modern language	Modern	a-la	dog		Farm animals	DOMESTIC ANIMALS	DOG				No loan
570	Abkhaz	Northwest Caucasian	58800	Modern language	Modern	a-šχa	bee		Farm animals	DOMESTIC INSECTS	BEE	92048	bee-1	Unspecified	No loan
557	Abkhaz	Northwest Caucasian	58800	Modern language	Modern	a-čˠa-da	donkey		Farm animals	DRAFT ANIMALS	DONKEY	92072	donkey-2	Inherited	No loan
556	Abkhaz	Northwest Caucasian	58800	Modern language	Modern	a-čˠə	horse		Farm animals	DRAFT ANIMALS	HORSE	92089	horse-4	Inherited	No loan
554	Abkhaz	Northwest Caucasian	58800	Modern language	Modern	a-k'ambaš	ox		Farm animals	DRAFT ANIMALS	OX				Loan	Megrelian
588	Abkhaz	Northwest Caucasian	58800	Modern language	Modern	a-cχa-r-ʒə	mead		Products	DRINK AND DRUGS	MEAD				No loan
587	Abkhaz	Northwest Caucasian	58800	Modern language	Modern	a-ω̄ʷə	wine		Products	DRINK AND DRUGS	WINE				Loan	Georgian
577	Abkhaz	Northwest Caucasian	58800	Modern language	Modern	a-dump'e-j	bison		Wild animals	GAME ANIMALS	BISON				Loan	Turkic (family)
578	Abkhaz	Northwest Caucasian	58800	Modern language	Modern	a-ža	hare / rabbit		Wild animals	GAME ANIMALS	HARE				No loan
578	Abkhaz	Northwest Caucasian	58800	Modern language	Modern	a-ža	hare / rabbit		Wild animals	GAME ANIMALS	RABBIT				No loan
573	Abkhaz	Northwest Caucasian	58800	Modern language	Modern	a-bən-ħʷa, a-bna-ħʷa	wild pig		Wild animals	GAME ANIMALS	WILD BOAR	92100	pig-3	Derivation	No loan
634	Abkhaz	Northwest Caucasian	58800	Modern language	Modern	a-ħʷəzba	knife		Weapons etc.	IMPLEMENTS	KNIFE				No loan
54132	Abkhaz	Northwest Caucasian	58800	Modern language	Modern	a-χʲarχʲ	saw		Cultural artefacts & tools	IMPLEMENTS	SAW				Loan	Georgian
611	Abkhaz	Northwest Caucasian	58800	Modern language	Modern	a-χʷarχʲ	saw		Cultural artefacts & tools	IMPLEMENTS	SAW				Loan	Megrelian
607	Abkhaz	Northwest Caucasian	58800	Modern language	Modern	a-čˠbəga	scythe		Cultural artefacts & tools	IMPLEMENTS	SCYTHE				No loan
608	Abkhaz	Northwest Caucasian	58800	Modern language	Modern	a-magana	sickle		Cultural artefacts & tools	IMPLEMENTS	SICKLE				Loan	Megrelian
609	Abkhaz	Northwest Caucasian	58800	Modern language	Modern	a-žˠəga	spade		Cultural artefacts & tools	IMPLEMENTS	SPADE				No loan
6234	Abkhaz	Northwest Caucasian	58800	Modern language	Modern	a-žә	meat, flesh		Products	MATERIALS	MEAT				No loan
591	Abkhaz	Northwest Caucasian	58800	Modern language	Modern	a-k'ʷac	meat, flesh		Products	MATERIALS	MEAT				Loan	Georgian
629	Abkhaz	Northwest Caucasian	58800	Modern language	Modern	a-cʷa	leather		Metals & materials	MATERIALS	LEATHER	93084	leather-1	Inherited	No loan
583	Abkhaz	Northwest Caucasian	58800	Modern language	Modern	a-χʷə	fur		Products	MATERIALS	FUR				No loan
592	Abkhaz	Northwest Caucasian	58800	Modern language	Modern	a-šˠ-šˠa	grease		Products	MATERIALS	GREASE				No loan
6294	Abkhaz	Northwest Caucasian	58800	Modern language	Modern	a-χaħʷ	stone		Metals & materials	MATERIALS	STONE				No loan
627	Abkhaz	Northwest Caucasian	58800	Modern language	Modern	a-c'la	wood		Metals & materials	MATERIALS	WOOD				Loan	Georgian
623	Abkhaz	Northwest Caucasian	58800	Modern language	Modern	a-bω̄ʷa	copper		Metals & materials	METALS	COPPER				No loan
626	Abkhaz	Northwest Caucasian	58800	Modern language	Modern	a-χʲə	gold		Metals & materials	METALS	GOLD				No loan
624	Abkhaz	Northwest Caucasian	58800	Modern language	Modern	a-jχa	iron		Metals & materials	METALS	IRON				No loan
625	Abkhaz	Northwest Caucasian	58800	Modern language	Modern	a-raʒnə	silver		Metals & materials	METALS	SILVER	93076	copper-6	Inherited	No loan
562	Abkhaz	Northwest Caucasian	58800	Modern language	Modern	a-ħʷa	pig		Farm animals	PIG RAISING	PIG	92100	pig-3	Inherited	No loan
563	Abkhaz	Northwest Caucasian	58800	Modern language	Modern	a-šə-š	piglet		Farm animals	PIG RAISING	PIGLET				No loan
566	Abkhaz	Northwest Caucasian	58800	Modern language	Modern	a-k'ʷč'əš	chicken		Farm animals	POULTRY	CHICKEN				No loan
567	Abkhaz	Northwest Caucasian	58800	Modern language	Modern	a-k'ʷat'a	duck		Farm animals	POULTRY	DUCK				No loan
564	Abkhaz	Northwest Caucasian	58800	Modern language	Modern	a-k'ʷt'ə	hen		Farm animals	POULTRY	HEN	92087	hen-4	Inherited	No loan
565	Abkhaz	Northwest Caucasian	58800	Modern language	Modern	a-r-ba-ɣʲ	rooster		Farm animals	POULTRY	ROOSTER	93489	eagle-1	Inherited	No loan
572	Abkhaz	Northwest Caucasian	58800	Modern language	Modern	a-mšʷ	bear		Wild animals	PREDATOR ANIMALS	BEAR	93473	bear-1	Inherited	No loan
576	Abkhaz	Northwest Caucasian	58800	Modern language	Modern	a-bga	jackal		Wild animals	PREDATOR ANIMALS	JACKAL	93474	bear-2	Inherited	No loan
574	Abkhaz	Northwest Caucasian	58800	Modern language	Modern	a-ləm	lion		Wild animals	PREDATOR ANIMALS	LION				Loan	Georgian
6284	Abkhaz	Northwest Caucasian	58800	Modern language	Modern	a-mat	snake		Wild animals	PREDATOR ANIMALS	SNAKE	93487	snake-2	Inherited	No loan
571	Abkhaz	Northwest Caucasian	58800	Modern language	Modern	a-bga, a-bga-du	wolf		Wild animals	PREDATOR ANIMALS	WOLF				No loan
575	Abkhaz	Northwest Caucasian	58800	Modern language	Modern	a-bga-χʷəč'ə	fox		Wild animals	PREDATOR ANIMALS	FOX	93474	bear-2	Derivation	No loan
581	Abkhaz	Northwest Caucasian	58800	Modern language	Modern	a-warba-žʷ	eagle		Wild animals	PREDATOR BIRDS	EAGLE				Loan	Georgian
580	Abkhaz	Northwest Caucasian	58800	Modern language	Modern	a-laħʷa	raven		Wild animals	PREDATOR BIRDS	RAVEN				No loan
584	Abkhaz	Northwest Caucasian	58800	Modern language	Modern	a-cχa	honey		Products	PRODUCTS	HONEY				No loan
589	Abkhaz	Northwest Caucasian	58800	Modern language	Modern	a-q'arma	hops		Products	PRODUCTS	HOPS				No loan
585	Abkhaz	Northwest Caucasian	58800	Modern language	Modern	a-χšˠ	milk		Products	PRODUCTS	MILK				No loan
6265	Abkhaz	Northwest Caucasian	58800	Modern language	Modern	a-ǯək'a	salt		Products	PRODUCTS	SALT				Loan	Turkic (family)
590	Abkhaz	Northwest Caucasian	58800	Modern language	Modern	a-cʷa	beeswax		Products	PRODUCTS	WAX (BEES)	92824	beeswax-2	Inherited	No loan
582	Abkhaz	Northwest Caucasian	58800	Modern language	Modern	a-lasa	wool		Products	PRODUCTS	WOOL	92846	wool-1	Inherited	No loan
620	Abkhaz	Northwest Caucasian	58800	Modern language	Modern	tagalan	autumn / harvest		Seasons	SEASONS	AUTUMN				No loan
620	Abkhaz	Northwest Caucasian	58800	Modern language	Modern	tagalan	autumn / harvest		Seasons	SEASONS	HARVEST				No loan
622	Abkhaz	Northwest Caucasian	58800	Modern language	Modern	aapən	spring		Seasons	SEASONS	SPRING	93804	spring-1	Inherited	No loan
619	Abkhaz	Northwest Caucasian	58800	Modern language	Modern	a-pχən	summer		Seasons	SEASONS	SUMMER				No loan
621	Abkhaz	Northwest Caucasian	58800	Modern language	Modern	a-ʒən	winter		Seasons	SEASONS	WINTER				No loan
561	Abkhaz	Northwest Caucasian	58800	Modern language	Modern	a-ba-ɣʲ	goat		Farm animals	SMALL CATTLE	GOAT				No loan
560	Abkhaz	Northwest Caucasian	58800	Modern language	Modern	a-t-sə-s, a-sə-s	lamb		Farm animals	SMALL CATTLE	LAMB				No loan
559	Abkhaz	Northwest Caucasian	58800	Modern language	Modern	a-tə-ɣʲ	ram		Farm animals	SMALL CATTLE	RAM				No loan
558	Abkhaz	Northwest Caucasian	58800	Modern language	Modern	a-wasa	sheep		Farm animals	SMALL CATTLE	SHEEP				Loan	Turkic (family)
616	Abkhaz	Northwest Caucasian	58800	Modern language	Modern	a-mχə	cultivated field		Cultural artefacts & tools	TILLAGE	CULTIVATED FIELD				No loan
610	Abkhaz	Northwest Caucasian	58800	Modern language	Modern	a-cʷamatʷa	plow		Cultural artefacts & tools	TILLAGE	PLOW (N)	92514	plow-1	Derivation	No loan
636	Abkhaz	Northwest Caucasian	58800	Modern language	Modern	a-r	army		Weapons etc.	WEAPONS	ARMY	93883	army-1	Inherited	No loan
632	Abkhaz	Northwest Caucasian	58800	Modern language	Modern	a-χəmp'al	arrow		Weapons etc.	WEAPONS	ARROW				No loan
612	Abkhaz	Northwest Caucasian	58800	Modern language	Modern	a-jχa	axe		Cultural artefacts & tools	WEAPONS	AXE				No loan
631	Abkhaz	Northwest Caucasian	58800	Modern language	Modern	a-χəc	bow		Weapons etc.	WEAPONS	BOW				No loan
635	Abkhaz	Northwest Caucasian	58800	Modern language	Modern	a-k'ʷalʒə	shield		Weapons etc.	WEAPONS	SHIELD				No loan
630	Abkhaz	Northwest Caucasian	58800	Modern language	Modern	a-psa	spear		Weapons etc.	WEAPONS	SPEAR				No loan
633	Abkhaz	Northwest Caucasian	58800	Modern language	Modern	a-ħʷ	sword		Weapons etc.	WEAPONS	SWORD				No loan
604	Abkhaz	Northwest Caucasian	58800	Modern language	Modern	a-c'ʷa	apple		Crops & fruit	VEGETABLES & FRUIT	APPLE				No loan
605	Abkhaz	Northwest Caucasian	58800	Modern language	Modern	a-ž	grape		Crops & fruit	VEGETABLES & FRUIT	GRAPE				No loan
603	Abkhaz	Northwest Caucasian	58800	Modern language	Modern	a-cə-χa	turnip		Crops & fruit	VEGETABLES & FRUIT	TURNIP				No loan
614	Abkhaz	Northwest Caucasian	58800	Modern language	Modern	a-wardən	wagon		Cultural artefacts & tools	VEHICLES	WAGON				No loan
615	Abkhaz	Northwest Caucasian	58800	Modern language	Modern	a-gʲaž	wheel		Cultural artefacts & tools	VEHICLES	WHEEL				No loan
613	Abkhaz	Northwest Caucasian	58800	Modern language	Modern	a-uɣʷ	yoke		Cultural artefacts & tools	VEHICLES	YOKE	92534	yoke-1	Certainly borrowed	Loan	Georgian
91246	Adyghe	Northwest Caucasian	68445	Modern language	Modern	źʷăn	plow		Activities	ACTIVITIES	TO PLOW	93625	to plow-1	Inherited	No loan
91247	Adyghe	Northwest Caucasian	68445	Modern language	Modern	pʰxən	sew		Activities	ACTIVITIES	TO SEW				No loan
91248	Adyghe	Northwest Caucasian	68445	Modern language	Modern	dăn	sow		Activities	ACTIVITIES	TO SOW				No loan
91249	Adyghe	Northwest Caucasian	68445	Modern language	Modern	śăn	spin (thread)		Activities	ACTIVITIES	TO SPIN (THREAD)				No loan
91250	Adyghe	Northwest Caucasian	68445	Modern language	Modern	ǯən	weave		Activities	ACTIVITIES	TO WEAVE				No loan
91275	Adyghe	Northwest Caucasian	68445	Modern language	Modern	bəɣʷ	bull		Farm animals	CATTLE	BULL				Loan	?
91277	Adyghe	Northwest Caucasian	68445	Modern language	Modern	bəl˜əm p'aśăχăr	cattle		Farm animals	CATTLE	CATTLE	93472	bison-1	Derivation	No loan
91279	Adyghe	Northwest Caucasian	68445	Modern language	Modern	čʰămə	cow		Farm animals	CATTLE	COW	92057	cattle-1	Inherited	No loan
91267	Adyghe	Northwest Caucasian	68445	Modern language	Modern	zəmăfăqăɣaɣ	flax		Crops & fruit	CROPS	FLAX				No loan
91265	Adyghe	Northwest Caucasian	68445	Modern language	Modern	č'ăplʻəbz	flax		Crops & fruit	CROPS	FLAX				No loan
91266	Adyghe	Northwest Caucasian	68445	Modern language	Modern	č'ăpdaχ	flax		Crops & fruit	CROPS	FLAX				No loan
91268	Adyghe	Northwest Caucasian	68445	Modern language	Modern	lăžʲəɣacă	grain (generic)		Crops & fruit	CROPS	GRAIN (GENERIC)				No loan
91270	Adyghe	Northwest Caucasian	68445	Modern language	Modern	zăntʰx	oats		Crops & fruit	CROPS	OATS				No loan
91271	Adyghe	Northwest Caucasian	68445	Modern language	Modern	ħamc'əj	rye		Crops & fruit	CROPS	RYE				No loan
91273	Adyghe	Northwest Caucasian	68445	Modern language	Modern	kwăcʰə	wheat		Crops & fruit	CROPS	WHEAT				No loan
91264	Adyghe	Northwest Caucasian	68445	Modern language	Modern	ħă	barley		Crops & fruit	CROPS	BARLEY				No loan
91276	Adyghe	Northwest Caucasian	68445	Modern language	Modern	čʰătəwə	cat		Farm animals	DOMESTIC ANIMALS	CAT	92056	cat-3	Inherited	No loan
91280	Adyghe	Northwest Caucasian	68445	Modern language	Modern	ħă	dog		Farm animals	DOMESTIC ANIMALS	DOG				No loan
91274	Adyghe	Northwest Caucasian	68445	Modern language	Modern	bžʲă	bee		Farm animals	DOMESTIC INSECTS	BEE	92049	bee-2	Inherited	No loan
91281	Adyghe	Northwest Caucasian	68445	Modern language	Modern	šʲədə	donkey		Farm animals	DRAFT ANIMALS	DONKEY	92072	donkey-2	Inherited	No loan
91286	Adyghe	Northwest Caucasian	68445	Modern language	Modern	šə	horse		Farm animals	DRAFT ANIMALS	HORSE	92089	horse-4	Inherited	No loan
91288	Adyghe	Northwest Caucasian	68445	Modern language	Modern	cʰʷə	ox		Farm animals	DRAFT ANIMALS	OX				No loan
91310	Adyghe	Northwest Caucasian	68445	Modern language	Modern	śʷăwəps, śʷăwə baxsəm	mead		Products	DRINK AND DRUGS	MEAD				No loan
91314	Adyghe	Northwest Caucasian	68445	Modern language	Modern	sană	wine		Products	DRINK AND DRUGS	WINE	92845	wine-2	Inherited	No loan
91332	Adyghe	Northwest Caucasian	68445	Modern language	Modern	dwambaj	bison		Wild animals	GAME ANIMALS	BISON				No loan
91335	Adyghe	Northwest Caucasian	68445	Modern language	Modern	tʰhak'ʷămč'əh	hare / rabbit		Wild animals	GAME ANIMALS	HARE				No loan
91335	Adyghe	Northwest Caucasian	68445	Modern language	Modern	tʰhak'ʷămč'əh	hare / rabbit		Wild animals	GAME ANIMALS	RABBIT				No loan
91342	Adyghe	Northwest Caucasian	68445	Modern language	Modern	măzəqʷ	wild pig		Wild animals	GAME ANIMALS	WILD BOAR				No loan
91326	Adyghe	Northwest Caucasian	68445	Modern language	Modern	śăźəj	knife		Weapons etc.	IMPLEMENTS	KNIFE				No loan
91325	Adyghe	Northwest Caucasian	68445	Modern language	Modern	săšχʷă	knife		Weapons etc.	IMPLEMENTS	KNIFE				No loan
91256	Adyghe	Northwest Caucasian	68445	Modern language	Modern	pʰxăχ	saw		Cultural artefacts & tools	IMPLEMENTS	SAW				No loan
91257	Adyghe	Northwest Caucasian	68445	Modern language	Modern	šʲămăǯ	scythe		Cultural artefacts & tools	IMPLEMENTS	SCYTHE				No loan
91258	Adyghe	Northwest Caucasian	68445	Modern language	Modern	ɣʷpč	sickle		Cultural artefacts & tools	IMPLEMENTS	SICKLE	92526	sickle-2	Inherited	No loan
91259	Adyghe	Northwest Caucasian	68445	Modern language	Modern	qazɣər	spade		Cultural artefacts & tools	IMPLEMENTS	SPADE				No loan
91311	Adyghe	Northwest Caucasian	68445	Modern language	Modern	lə	meat		Products	MATERIALS	MEAT				No loan
91298	Adyghe	Northwest Caucasian	68445	Modern language	Modern	śʷă	leather		Metals & materials	MATERIALS	LEATHER	93084	leather-1	Inherited	No loan
91304	Adyghe	Northwest Caucasian	68445	Modern language	Modern	cʰə	fur		Products	MATERIALS	FUR				No loan
91305	Adyghe	Northwest Caucasian	68445	Modern language	Modern	daɣă	grease		Products	MATERIALS	GREASE				No loan
91306	Adyghe	Northwest Caucasian	68445	Modern language	Modern	šă	grease		Products	MATERIALS	GREASE				No loan
91300	Adyghe	Northwest Caucasian	68445	Modern language	Modern	məźʷă	stone		Metals & materials	MATERIALS	STONE				No loan
91301	Adyghe	Northwest Caucasian	68445	Modern language	Modern	pxă	wood		Metals & materials	MATERIALS	WOOD	93094	wood-2	Inherited	No loan
91295	Adyghe	Northwest Caucasian	68445	Modern language	Modern	ɣʷaplʻă	copper		Metals & materials	METALS	COPPER	93074	copper-4	Derivation	No loan
91296	Adyghe	Northwest Caucasian	68445	Modern language	Modern	dəśă	gold		Metals & materials	METALS	GOLD	93096	gold-2	Inherited	No loan
91297	Adyghe	Northwest Caucasian	68445	Modern language	Modern	ɣʷč'ə	iron		Metals & materials	METALS	IRON	93081	iron-2	Inherited	No loan
91299	Adyghe	Northwest Caucasian	68445	Modern language	Modern	təžʲən	silver		Metals & materials	METALS	SILVER	93076	copper-6	Inherited	No loan
92291	Adyghe	Northwest Caucasian	68445	Modern language	Modern	ɣaw	pig; piglet		Farm animals	PIG RAISING	PIG	92099	pig-2	Inherited	No loan
91289	Adyghe	Northwest Caucasian	68445	Modern language	Modern	qʷă	pig		Farm animals	PIG RAISING	PIG	92100	pig-3	Inherited	No loan
92291	Adyghe	Northwest Caucasian	68445	Modern language	Modern	ɣaw	pig; piglet		Farm animals	PIG RAISING	PIGLET	92099	pig-2	Inherited	No loan
91290	Adyghe	Northwest Caucasian	68445	Modern language	Modern	qʷăšʲər	piglet		Farm animals	PIG RAISING	PIGLET	92100	pig-3	Derivation	No loan
91278	Adyghe	Northwest Caucasian	68445	Modern language	Modern	čʰătźəj	chicken		Farm animals	POULTRY	CHICKEN				No loan
91282	Adyghe	Northwest Caucasian	68445	Modern language	Modern	pʰsəčʰătʰ	duck		Farm animals	POULTRY	DUCK				No loan
91285	Adyghe	Northwest Caucasian	68445	Modern language	Modern	čʰătʰə	hen		Farm animals	POULTRY	HEN	92087	hen-4	Inherited	No loan
91293	Adyghe	Northwest Caucasian	68445	Modern language	Modern	ataqă	rooster		Farm animals	POULTRY	ROOSTER	92103	rooster-1	Inherited	No loan
91331	Adyghe	Northwest Caucasian	68445	Modern language	Modern	məśă	bear		Wild animals	PREDATOR ANIMALS	BEAR	93473	bear-1	Inherited	No loan
91336	Adyghe	Northwest Caucasian	68445	Modern language	Modern	hăʼʷcʰəz	jackal		Wild animals	PREDATOR ANIMALS	JACKAL				No loan
91337	Adyghe	Northwest Caucasian	68445	Modern language	Modern	hašəwəməš	jackal		Wild animals	PREDATOR ANIMALS	JACKAL				No loan
91338	Adyghe	Northwest Caucasian	68445	Modern language	Modern	măz čʰătəwəšxʷ	leopard		Wild animals	PREDATOR ANIMALS	LEOPARD				No loan
91339	Adyghe	Northwest Caucasian	68445	Modern language	Modern	aslʻan	lion		Wild animals	PREDATOR ANIMALS	LION				Loan	?
91341	Adyghe	Northwest Caucasian	68445	Modern language	Modern	bl˜ă	snake		Wild animals	PREDATOR ANIMALS	SNAKE				No loan
91343	Adyghe	Northwest Caucasian	68445	Modern language	Modern	təɣʷź	wolf		Wild animals	PREDATOR ANIMALS	WOLF				No loan
91334	Adyghe	Northwest Caucasian	68445	Modern language	Modern	baǯă	fox		Wild animals	PREDATOR ANIMALS	FOX	93474	bear-2	Inherited	No loan
91333	Adyghe	Northwest Caucasian	68445	Modern language	Modern	bɣăźə	eagle		Wild animals	PREDATOR BIRDS	EAGLE				No loan
91340	Adyghe	Northwest Caucasian	68445	Modern language	Modern	cʰʷəndə	raven		Wild animals	PREDATOR BIRDS	RAVEN				No loan
91307	Adyghe	Northwest Caucasian	68445	Modern language	Modern	śʷăwə	honey		Products	PRODUCTS	HONEY	92824	beeswax-2	Inherited	No loan
91309	Adyghe	Northwest Caucasian	68445	Modern language	Modern	bžʲală	hops		Products	PRODUCTS	HOPS				No loan
91308	Adyghe	Northwest Caucasian	68445	Modern language	Modern	ɣătăǯ	hops		Products	PRODUCTS	HOPS				No loan
91312	Adyghe	Northwest Caucasian	68445	Modern language	Modern	šʲă	milk		Products	PRODUCTS	MILK				No loan
91313	Adyghe	Northwest Caucasian	68445	Modern language	Modern	šʲəɣʷ	salt		Products	PRODUCTS	SALT				No loan
91303	Adyghe	Northwest Caucasian	68445	Modern language	Modern	šakʷă	beeswax		Products	PRODUCTS	WAX (BEES)	92823	beeswax-1	Inherited	No loan
91302	Adyghe	Northwest Caucasian	68445	Modern language	Modern	šăfə	beeswax		Products	PRODUCTS	WAX (BEES)	92836	mead-2	Inherited	No loan
91315	Adyghe	Northwest Caucasian	68445	Modern language	Modern	cʰə	wool		Products	PRODUCTS	WOOL				No loan
91316	Adyghe	Northwest Caucasian	68445	Modern language	Modern	χənəɣʷ	autumn / harvest		Seasons	SEASONS	AUTUMN				No loan
91317	Adyghe	Northwest Caucasian	68445	Modern language	Modern	bžəhă	autumn / harvest		Seasons	SEASONS	AUTUMN	93800	autumn-1	Inherited	No loan
91316	Adyghe	Northwest Caucasian	68445	Modern language	Modern	χənəɣʷ	autumn / harvest		Seasons	SEASONS	HARVEST				No loan
91317	Adyghe	Northwest Caucasian	68445	Modern language	Modern	bžəhă	autumn / harvest		Seasons	SEASONS	HARVEST	93800	autumn-1	Inherited	No loan
91318	Adyghe	Northwest Caucasian	68445	Modern language	Modern	ɣatχă	spring		Seasons	SEASONS	SPRING				No loan
91319	Adyghe	Northwest Caucasian	68445	Modern language	Modern	ɣămaf	summer		Seasons	SEASONS	SUMMER				No loan
91320	Adyghe	Northwest Caucasian	68445	Modern language	Modern	č'əmaf, č'ə	winter		Seasons	SEASONS	WINTER				No loan
91284	Adyghe	Northwest Caucasian	68445	Modern language	Modern	pčʰănə	goat		Farm animals	SMALL CATTLE	GOAT	92078	goat-1	Inherited	No loan
91283	Adyghe	Northwest Caucasian	68445	Modern language	Modern	ačă	goat		Farm animals	SMALL CATTLE	GOAT	92081	goat-3	Inherited	No loan
91287	Adyghe	Northwest Caucasian	68445	Modern language	Modern	śənă	lamb		Farm animals	SMALL CATTLE	LAMB				No loan
91291	Adyghe	Northwest Caucasian	68445	Modern language	Modern	măl˜ə	ram		Farm animals	SMALL CATTLE	RAM				Loan	?
91292	Adyghe	Northwest Caucasian	68445	Modern language	Modern	t'ə	ram		Farm animals	SMALL CATTLE	RAM	92092	lamb-1	Inherited	No loan
91294	Adyghe	Northwest Caucasian	68445	Modern language	Modern	măl ʼaxʷăɣʷ	sheep		Farm animals	SMALL CATTLE	SHEEP				No loan
91253	Adyghe	Northwest Caucasian	68445	Modern language	Modern	źʷaɣă	cultivated field		Cultural artefacts & tools	TILLAGE	CULTIVATED FIELD				No loan
91255	Adyghe	Northwest Caucasian	68445	Modern language	Modern	pʰxăʼašʷ	plow		Cultural artefacts & tools	TILLAGE	PLOW (N)				No loan
91321	Adyghe	Northwest Caucasian	68445	Modern language	Modern	ʒă	army		Weapons etc.	WEAPONS	ARMY	93885	army-3	Inherited	No loan
91322	Adyghe	Northwest Caucasian	68445	Modern language	Modern	šʲabzašʲ	arrow		Weapons etc.	WEAPONS	ARROW				No loan
91252	Adyghe	Northwest Caucasian	68445	Modern language	Modern	watʰəčʰ, watʰă	axe		Cultural artefacts & tools	WEAPONS	AXE				No loan
91324	Adyghe	Northwest Caucasian	68445	Modern language	Modern	šʲabză	bow		Weapons etc.	WEAPONS	BOW				No loan
91328	Adyghe	Northwest Caucasian	68445	Modern language	Modern	măʼʷ	shield		Weapons etc.	WEAPONS	SHIELD				No loan
91327	Adyghe	Northwest Caucasian	68445	Modern language	Modern	čʰătʰăpʰăʼʷʒ	shield		Weapons etc.	WEAPONS	SHIELD				No loan
91329	Adyghe	Northwest Caucasian	68445	Modern language	Modern	pʰčʰəpʰəǯən	spear		Weapons etc.	WEAPONS	SPEAR				No loan
91330	Adyghe	Northwest Caucasian	68445	Modern language	Modern	čʰatʰă	sword		Weapons etc.	WEAPONS	SWORD				No loan
91263	Adyghe	Northwest Caucasian	68445	Modern language	Modern	məʼarəs	apple		Crops & fruit	VEGETABLES & FRUIT	APPLE				No loan
91269	Adyghe	Northwest Caucasian	68445	Modern language	Modern	sănaśħ	grape		Crops & fruit	VEGETABLES & FRUIT	GRAPE				No loan
91272	Adyghe	Northwest Caucasian	68445	Modern language	Modern	băləǯ	turnip		Crops & fruit	VEGETABLES & FRUIT	TURNIP				No loan
91260	Adyghe	Northwest Caucasian	68445	Modern language	Modern	kʷə, kʰwə	wagon		Cultural artefacts & tools	VEHICLES	WAGON	92530	wagon-1	Inherited	No loan
91261	Adyghe	Northwest Caucasian	68445	Modern language	Modern	šʲărăx	wheel		Cultural artefacts & tools	VEHICLES	WHEEL				No loan
91262	Adyghe	Northwest Caucasian	68445	Modern language	Modern	bžʲə	yoke		Cultural artefacts & tools	VEHICLES	YOKE				No loan
90707	Aghul	Nakh-Dagestanian	68480	Modern language	Modern	izan aq'as	plow		Activities	ACTIVITIES	TO PLOW				No loan
90706	Aghul	Nakh-Dagestanian	68480	Modern language	Modern	ʁadarkʰas	plow		Activities	ACTIVITIES	TO PLOW				No loan
90705	Aghul	Nakh-Dagestanian	68480	Modern language	Modern	ibħjas	plow		Activities	ACTIVITIES	TO PLOW				No loan
90708	Aghul	Nakh-Dagestanian	68480	Modern language	Modern	duq'a(na)s	sew		Activities	ACTIVITIES	TO SEW				No loan
90709	Aghul	Nakh-Dagestanian	68480	Modern language	Modern	uzas	sow		Activities	ACTIVITIES	TO SOW				No loan
90710	Aghul	Nakh-Dagestanian	68480	Modern language	Modern	ruxas	weave		Activities	ACTIVITIES	TO WEAVE				No loan
90752	Aghul	Nakh-Dagestanian	68480	Modern language	Modern	jard	bull		Farm animals	CATTLE	BULL				No loan
90753	Aghul	Nakh-Dagestanian	68480	Modern language	Modern	buʁa	bull		Farm animals	CATTLE	BULL				Loan	Turkic (family)
90751	Aghul	Nakh-Dagestanian	68480	Modern language	Modern	becʰ, vecʰ	bull		Farm animals	CATTLE	BULL	92093	ox-1	Inherited	No loan
90756	Aghul	Nakh-Dagestanian	68480	Modern language	Modern	čʰarava	cattle		Farm animals	CATTLE	CATTLE				No loan
90757	Aghul	Nakh-Dagestanian	68480	Modern language	Modern	ħupʰpʰar	cattle		Farm animals	CATTLE	CATTLE				No loan
90755	Aghul	Nakh-Dagestanian	68480	Modern language	Modern	mal, malar	cattle		Farm animals	CATTLE	CATTLE				Loan	?
90760	Aghul	Nakh-Dagestanian	68480	Modern language	Modern	xạni, ħuni, ħuˁni	cow		Farm animals	CATTLE	COW	92024	ox-2	Inherited	No loan
90736	Aghul	Nakh-Dagestanian	68480	Modern language	Modern	ganab, kʰenaf	flax		Crops & fruit	CROPS	FLAX				No loan
90738	Aghul	Nakh-Dagestanian	68480	Modern language	Modern	tʰurtʰ	flax		Crops & fruit	CROPS	FLAX				No loan
90737	Aghul	Nakh-Dagestanian	68480	Modern language	Modern	ħalatʰutʰ	flax		Crops & fruit	CROPS	FLAX				No loan
90739	Aghul	Nakh-Dagestanian	68480	Modern language	Modern	ud, ur, q'ur	grain (generic)		Crops & fruit	CROPS	GRAIN (GENERIC)				No loan
90743	Aghul	Nakh-Dagestanian	68480	Modern language	Modern	alčʰiχar	oats		Crops & fruit	CROPS	OATS				No loan
90742	Aghul	Nakh-Dagestanian	68480	Modern language	Modern	(j)ajčʰax	oats		Crops & fruit	CROPS	OATS				No loan
90744	Aghul	Nakh-Dagestanian	68480	Modern language	Modern	ǯarx	oats		Crops & fruit	CROPS	OATS				No loan
90745	Aghul	Nakh-Dagestanian	68480	Modern language	Modern	c'izmak	oats		Crops & fruit	CROPS	OATS				No loan
90746	Aghul	Nakh-Dagestanian	68480	Modern language	Modern	sụl, sül	rye		Crops & fruit	CROPS	RYE				No loan
90749	Aghul	Nakh-Dagestanian	68480	Modern language	Modern	guni	wheat		Crops & fruit	CROPS	WHEAT				No loan
90748	Aghul	Nakh-Dagestanian	68480	Modern language	Modern	ek'	wheat		Crops & fruit	CROPS	WHEAT	93278	wheat-1	Inherited	No loan
90734	Aghul	Nakh-Dagestanian	68480	Modern language	Modern	ǯarx	barley		Crops & fruit	CROPS	BARLEY				No loan
90733	Aghul	Nakh-Dagestanian	68480	Modern language	Modern	mux	barley		Crops & fruit	CROPS	BARLEY				No loan
90735	Aghul	Nakh-Dagestanian	68480	Modern language	Modern	šišik'	barley		Crops & fruit	CROPS	BARLEY				No loan
90754	Aghul	Nakh-Dagestanian	68480	Modern language	Modern	gitʰan, kʰitʰan	cat		Farm animals	DOMESTIC ANIMALS	CAT	92056	cat-3	Inherited	No loan
90763	Aghul	Nakh-Dagestanian	68480	Modern language	Modern	tʰartʰa	dog		Farm animals	DOMESTIC ANIMALS	DOG				No loan
90761	Aghul	Nakh-Dagestanian	68480	Modern language	Modern	xuj, ʁuj, ʁur, quj	dog		Farm animals	DOMESTIC ANIMALS	DOG				No loan
90762	Aghul	Nakh-Dagestanian	68480	Modern language	Modern	tʰula	dog		Farm animals	DOMESTIC ANIMALS	DOG				Loan	?
90750	Aghul	Nakh-Dagestanian	68480	Modern language	Modern	war(w)	bee		Farm animals	DOMESTIC INSECTS	BEE				No loan
90764	Aghul	Nakh-Dagestanian	68480	Modern language	Modern	ešeg	donkey		Farm animals	DRAFT ANIMALS	DONKEY				Loan	?
90765	Aghul	Nakh-Dagestanian	68480	Modern language	Modern	dagi, degi	donkey		Farm animals	DRAFT ANIMALS	DONKEY	92073	donkey-4	Inherited	No loan
90771	Aghul	Nakh-Dagestanian	68480	Modern language	Modern	ħejvan	horse		Farm animals	DRAFT ANIMALS	HORSE				Loan	Arabic
90775	Aghul	Nakh-Dagestanian	68480	Modern language	Modern	vicʰ, vecʰ, becʰ	ox		Farm animals	DRAFT ANIMALS	OX				No loan
90774	Aghul	Nakh-Dagestanian	68480	Modern language	Modern	buʁa	ox		Farm animals	DRAFT ANIMALS	OX				Loan	Turkic (family)
90810	Aghul	Nakh-Dagestanian	68480	Modern language	Modern	čʰaxir, čʰexir	wine		Products	DRINK AND DRUGS	WINE				No loan
90829	Aghul	Nakh-Dagestanian	68480	Modern language	Modern	daran becʰ, daran vecʰ	bison		Wild animals	GAME ANIMALS	BISON				No loan
90833	Aghul	Nakh-Dagestanian	68480	Modern language	Modern	ωur	hare / rabbit		Wild animals	GAME ANIMALS	HARE				No loan
90833	Aghul	Nakh-Dagestanian	68480	Modern language	Modern	ωur	hare / rabbit		Wild animals	GAME ANIMALS	RABBIT				No loan
90843	Aghul	Nakh-Dagestanian	68480	Modern language	Modern	vakʰ:	wild pig		Wild animals	GAME ANIMALS	WILD BOAR				No loan
90844	Aghul	Nakh-Dagestanian	68480	Modern language	Modern	qaban	wild pig		Wild animals	GAME ANIMALS	WILD BOAR				Loan	?
90845	Aghul	Nakh-Dagestanian	68480	Modern language	Modern	daran	wild pig		Wild animals	GAME ANIMALS	WILD BOAR				No loan
90822	Aghul	Nakh-Dagestanian	68480	Modern language	Modern	kant'	knife		Weapons etc.	IMPLEMENTS	KNIFE				No loan
90719	Aghul	Nakh-Dagestanian	68480	Modern language	Modern	derexil, duraxil, duruxal, duraxal	saw		Cultural artefacts & tools	IMPLEMENTS	SAW				No loan
90720	Aghul	Nakh-Dagestanian	68480	Modern language	Modern	durgecʰ, dürgecʰ, derecʰ	scythe		Cultural artefacts & tools	IMPLEMENTS	SCYTHE				No loan
90724	Aghul	Nakh-Dagestanian	68480	Modern language	Modern	dahur	sickle		Cultural artefacts & tools	IMPLEMENTS	SICKLE				No loan
90722	Aghul	Nakh-Dagestanian	68480	Modern language	Modern	makʰkʰal	sickle		Cultural artefacts & tools	IMPLEMENTS	SICKLE				No loan
90721	Aghul	Nakh-Dagestanian	68480	Modern language	Modern	č'inekʰ, č'inik'	sickle		Cultural artefacts & tools	IMPLEMENTS	SICKLE				No loan
90723	Aghul	Nakh-Dagestanian	68480	Modern language	Modern	xabakʰ	sickle		Cultural artefacts & tools	IMPLEMENTS	SICKLE				No loan
90726	Aghul	Nakh-Dagestanian	68480	Modern language	Modern	k'et'a	spade		Cultural artefacts & tools	IMPLEMENTS	SPADE				No loan
90725	Aghul	Nakh-Dagestanian	68480	Modern language	Modern	ber	spade		Cultural artefacts & tools	IMPLEMENTS	SPADE				Loan	Turkic (family)
90807	Aghul	Nakh-Dagestanian	68480	Modern language	Modern	jakʰ:	meat		Products	MATERIALS	MEAT				No loan
90793	Aghul	Nakh-Dagestanian	68480	Modern language	Modern	q'ạdiq', q'udaq', q'ʷadeq', qareq', q;udiq'	leather		Metals & materials	MATERIALS	LEATHER				No loan
90790	Aghul	Nakh-Dagestanian	68480	Modern language	Modern	č'il	leather		Metals & materials	MATERIALS	LEATHER				No loan
90792	Aghul	Nakh-Dagestanian	68480	Modern language	Modern	le'	leather		Metals & materials	MATERIALS	LEATHER				No loan
90791	Aghul	Nakh-Dagestanian	68480	Modern language	Modern	xam	leather		Metals & materials	MATERIALS	LEATHER	93085	leather-2	Inherited	No loan
90801	Aghul	Nakh-Dagestanian	68480	Modern language	Modern	irǯ	fur		Products	MATERIALS	FUR				No loan
90802	Aghul	Nakh-Dagestanian	68480	Modern language	Modern	č'ič'	fur		Products	MATERIALS	FUR				No loan
90804	Aghul	Nakh-Dagestanian	68480	Modern language	Modern	čʰ:am	grease		Products	MATERIALS	GREASE				No loan
90803	Aghul	Nakh-Dagestanian	68480	Modern language	Modern	jaʁ	grease		Products	MATERIALS	GREASE				Loan	Turkic (family)
90796	Aghul	Nakh-Dagestanian	68480	Modern language	Modern	qʷan	stone		Metals & materials	MATERIALS	STONE				No loan
90797	Aghul	Nakh-Dagestanian	68480	Modern language	Modern	q'utʰ	stone		Metals & materials	MATERIALS	STONE				No loan
90798	Aghul	Nakh-Dagestanian	68480	Modern language	Modern	k'ur	wood		Metals & materials	MATERIALS	WOOD				No loan
90786	Aghul	Nakh-Dagestanian	68480	Modern language	Modern	if, if:	copper		Metals & materials	METALS	COPPER				No loan
90788	Aghul	Nakh-Dagestanian	68480	Modern language	Modern	mufaq'	gold		Metals & materials	METALS	GOLD				No loan
90787	Aghul	Nakh-Dagestanian	68480	Modern language	Modern	q:izil	gold		Metals & materials	METALS	GOLD	94262	PT *Kɨ̄ŕ- 'red'	Certainly borrowed	Loan	Turkic (family)
90789	Aghul	Nakh-Dagestanian	68480	Modern language	Modern	ruq'	iron		Metals & materials	METALS	IRON	92510	axe-3	Inherited	No loan
90795	Aghul	Nakh-Dagestanian	68480	Modern language	Modern	gumuš	silver		Metals & materials	METALS	SILVER				Loan	Turkic (family)
90794	Aghul	Nakh-Dagestanian	68480	Modern language	Modern	ars	silver		Metals & materials	METALS	SILVER	93088	silver-3	Inherited	No loan
90778	Aghul	Nakh-Dagestanian	68480	Modern language	Modern	buq'acʰ, buk'acʰ	pig		Farm animals	PIG RAISING	PIG				No loan
90777	Aghul	Nakh-Dagestanian	68480	Modern language	Modern	vakʰ:	pig		Farm animals	PIG RAISING	PIG				No loan
90776	Aghul	Nakh-Dagestanian	68480	Modern language	Modern	sul	pig		Farm animals	PIG RAISING	PIG				No loan
90779	Aghul	Nakh-Dagestanian	68480	Modern language	Modern	barc'akʰ	piglet		Farm animals	PIG RAISING	PIGLET				No loan
90759	Aghul	Nakh-Dagestanian	68480	Modern language	Modern	c'ibc'ibaj	chicken		Farm animals	POULTRY	CHICKEN				No loan
90758	Aghul	Nakh-Dagestanian	68480	Modern language	Modern	čakʰ:ʷ, čarkʰ:ʷ	chicken		Farm animals	POULTRY	CHICKEN				No loan
90766	Aghul	Nakh-Dagestanian	68480	Modern language	Modern	urdag, ürdeg, urdeg	duck		Farm animals	POULTRY	DUCK				Loan	Turkic (family)
90770	Aghul	Nakh-Dagestanian	68480	Modern language	Modern	paˁ, päˁ, peˁ	hen		Farm animals	POULTRY	HEN				No loan
90784	Aghul	Nakh-Dagestanian	68480	Modern language	Modern	kʰ:ekʰ:	rooster		Farm animals	POULTRY	ROOSTER				No loan
90783	Aghul	Nakh-Dagestanian	68480	Modern language	Modern	tʰ:atʰ:	rooster		Farm animals	POULTRY	ROOSTER	92104	rooster-2	Inherited	No loan
90828	Aghul	Nakh-Dagestanian	68480	Modern language	Modern	bạgniš, bạngiš	bear		Wild animals	PREDATOR ANIMALS	BEAR				No loan
90834	Aghul	Nakh-Dagestanian	68480	Modern language	Modern	čʰaqal	jackal		Wild animals	PREDATOR ANIMALS	JACKAL				Loan	Persian
90835	Aghul	Nakh-Dagestanian	68480	Modern language	Modern	pʰalang	leopard		Wild animals	PREDATOR ANIMALS	LEOPARD				Loan	?
90836	Aghul	Nakh-Dagestanian	68480	Modern language	Modern	aslan	lion		Wild animals	PREDATOR ANIMALS	LION				Loan	Turkic (family)
90841	Aghul	Nakh-Dagestanian	68480	Modern language	Modern	murdal	snake		Wild animals	PREDATOR ANIMALS	SNAKE				No loan
90842	Aghul	Nakh-Dagestanian	68480	Modern language	Modern	ilan	snake		Wild animals	PREDATOR ANIMALS	SNAKE				Loan	Turkic (family)
90847	Aghul	Nakh-Dagestanian	68480	Modern language	Modern	ǯanawur	wolf		Wild animals	PREDATOR ANIMALS	WOLF				Loan	?
90846	Aghul	Nakh-Dagestanian	68480	Modern language	Modern	ħučʰ	wolf		Wild animals	PREDATOR ANIMALS	WOLF	93479	wolf-2	Inherited	No loan
90832	Aghul	Nakh-Dagestanian	68480	Modern language	Modern	sul, sül	fox		Wild animals	PREDATOR ANIMALS	FOX	93485	jackal-1	Inherited	No loan
90830	Aghul	Nakh-Dagestanian	68480	Modern language	Modern	leˁ, liˁ, liq'	eagle		Wild animals	PREDATOR BIRDS	EAGLE				No loan
90831	Aghul	Nakh-Dagestanian	68480	Modern language	Modern	marc'	eagle		Wild animals	PREDATOR BIRDS	EAGLE	93490	eagle-2	Inherited	No loan
90838	Aghul	Nakh-Dagestanian	68480	Modern language	Modern	qˣwaωanaj	raven		Wild animals	PREDATOR BIRDS	RAVEN				No loan
90839	Aghul	Nakh-Dagestanian	68480	Modern language	Modern	qạd	raven		Wild animals	PREDATOR BIRDS	RAVEN				No loan
90840	Aghul	Nakh-Dagestanian	68480	Modern language	Modern	q:arʁa	raven		Wild animals	PREDATOR BIRDS	RAVEN				Loan	?
90837	Aghul	Nakh-Dagestanian	68480	Modern language	Modern	qˣwetʰ:	raven		Wild animals	PREDATOR BIRDS	RAVEN	93488	raven-1	Inherited	No loan
90805	Aghul	Nakh-Dagestanian	68480	Modern language	Modern	ütʰ:	honey		Products	PRODUCTS	HONEY				No loan
90806	Aghul	Nakh-Dagestanian	68480	Modern language	Modern	mek'i	hops		Products	PRODUCTS	HOPS				No loan
90808	Aghul	Nakh-Dagestanian	68480	Modern language	Modern	nikʰ:, nekʰ:	milk		Products	PRODUCTS	MILK				No loan
90809	Aghul	Nakh-Dagestanian	68480	Modern language	Modern	q'el, q'ạl	salt		Products	PRODUCTS	SALT				No loan
90799	Aghul	Nakh-Dagestanian	68480	Modern language	Modern	mum	beeswax		Products	PRODUCTS	WAX (BEES)				Loan	Persian
90800	Aghul	Nakh-Dagestanian	68480	Modern language	Modern	milax	beeswax		Products	PRODUCTS	WAX (BEES)				Loan	?
90811	Aghul	Nakh-Dagestanian	68480	Modern language	Modern	χej	wool		Products	PRODUCTS	WOOL				No loan
90812	Aghul	Nakh-Dagestanian	68480	Modern language	Modern	cʰul	autumn / harvest		Seasons	SEASONS	AUTUMN	93807	winter-2	Inherited	No loan
90812	Aghul	Nakh-Dagestanian	68480	Modern language	Modern	cʰul	autumn / harvest		Seasons	SEASONS	HARVEST	93807	winter-2	Inherited	No loan
90813	Aghul	Nakh-Dagestanian	68480	Modern language	Modern	χid, χir	spring		Seasons	SEASONS	SPRING				No loan
90814	Aghul	Nakh-Dagestanian	68480	Modern language	Modern	ωuˁl, ωad, ʁöl	summer		Seasons	SEASONS	SUMMER	93809	summer-1	Inherited	No loan
90815	Aghul	Nakh-Dagestanian	68480	Modern language	Modern	ˁur, q'urd	winter		Seasons	SEASONS	WINTER				No loan
90768	Aghul	Nakh-Dagestanian	68480	Modern language	Modern	q'ạcʰa, q'ecʰ	goat		Farm animals	SMALL CATTLE	GOAT				No loan
90767	Aghul	Nakh-Dagestanian	68480	Modern language	Modern	q'un	goat		Farm animals	SMALL CATTLE	GOAT				No loan
90769	Aghul	Nakh-Dagestanian	68480	Modern language	Modern	mudur	goat		Farm animals	SMALL CATTLE	GOAT				No loan
90773	Aghul	Nakh-Dagestanian	68480	Modern language	Modern	urg	lamb		Farm animals	SMALL CATTLE	LAMB				No loan
90772	Aghul	Nakh-Dagestanian	68480	Modern language	Modern	kʰkʰel	lamb		Farm animals	SMALL CATTLE	LAMB				Loan	?
90780	Aghul	Nakh-Dagestanian	68480	Modern language	Modern	ωuˁbar	ram		Farm animals	SMALL CATTLE	RAM				No loan
90781	Aghul	Nakh-Dagestanian	68480	Modern language	Modern	uq'ar	ram		Farm animals	SMALL CATTLE	RAM				No loan
90782	Aghul	Nakh-Dagestanian	68480	Modern language	Modern	sem	ram		Farm animals	SMALL CATTLE	RAM				No loan
90785	Aghul	Nakh-Dagestanian	68480	Modern language	Modern	ħub, ħuˁpʰpʰar	sheep		Farm animals	SMALL CATTLE	SHEEP				No loan
90718	Aghul	Nakh-Dagestanian	68480	Modern language	Modern	kʰutʰan, kʰutʰal	plow		Cultural artefacts & tools	TILLAGE	PLOW (N)				Loan	?
90817	Aghul	Nakh-Dagestanian	68480	Modern language	Modern	armi	army		Weapons etc.	WEAPONS	ARMY				Loan	?
90816	Aghul	Nakh-Dagestanian	68480	Modern language	Modern	qušum	army		Weapons etc.	WEAPONS	ARMY				Loan	Turkic (family)
90818	Aghul	Nakh-Dagestanian	68480	Modern language	Modern	ħal, hel	arrow		Weapons etc.	WEAPONS	ARROW				No loan
90713	Aghul	Nakh-Dagestanian	68480	Modern language	Modern	jak'ʷ, jik'ʷ	axe		Cultural artefacts & tools	WEAPONS	AXE	92510	axe-3	Derivation	No loan
90821	Aghul	Nakh-Dagestanian	68480	Modern language	Modern	tʰerkʰiš	bow		Weapons etc.	WEAPONS	BOW				No loan
90819	Aghul	Nakh-Dagestanian	68480	Modern language	Modern	tʰ:ikʰ:ra, dikʰ:ra, dakʰ:ra	bow		Weapons etc.	WEAPONS	BOW				No loan
90820	Aghul	Nakh-Dagestanian	68480	Modern language	Modern	č'ič'ak'	bow		Weapons etc.	WEAPONS	BOW				No loan
90823	Aghul	Nakh-Dagestanian	68480	Modern language	Modern	q:alxan	shield		Weapons etc.	WEAPONS	SHIELD				Loan	Turkic (family)
90824	Aghul	Nakh-Dagestanian	68480	Modern language	Modern	žida	spear		Weapons etc.	WEAPONS	SPEAR				No loan
90827	Aghul	Nakh-Dagestanian	68480	Modern language	Modern	qạma	sword		Weapons etc.	WEAPONS	SWORD				No loan
90826	Aghul	Nakh-Dagestanian	68480	Modern language	Modern	tʰur	sword		Weapons etc.	WEAPONS	SWORD				No loan
90825	Aghul	Nakh-Dagestanian	68480	Modern language	Modern	q:ilinž	sword		Weapons etc.	WEAPONS	SWORD				Loan	Turkic (family)
90732	Aghul	Nakh-Dagestanian	68480	Modern language	Modern	hečʰ, ħačʰ	apple		Crops & fruit	VEGETABLES & FRUIT	APPLE				No loan
90741	Aghul	Nakh-Dagestanian	68480	Modern language	Modern	t'ibit', t'iwit'	grape		Crops & fruit	VEGETABLES & FRUIT	GRAPE				No loan
90740	Aghul	Nakh-Dagestanian	68480	Modern language	Modern	üzüm	grape		Crops & fruit	VEGETABLES & FRUIT	GRAPE				Loan	Turkic (family)
90747	Aghul	Nakh-Dagestanian	68480	Modern language	Modern	tʰurpʰ	turnip		Crops & fruit	VEGETABLES & FRUIT	TURNIP				Loan	Persian
90728	Aghul	Nakh-Dagestanian	68480	Modern language	Modern	čʰiq', čʰuq'var	wagon		Cultural artefacts & tools	VEHICLES	WAGON				No loan
90727	Aghul	Nakh-Dagestanian	68480	Modern language	Modern	ωaraba	wagon		Cultural artefacts & tools	VEHICLES	WAGON				Loan	?
90730	Aghul	Nakh-Dagestanian	68480	Modern language	Modern	fur	wheel		Cultural artefacts & tools	VEHICLES	WHEEL				No loan
90729	Aghul	Nakh-Dagestanian	68480	Modern language	Modern	čʰarx	wheel		Cultural artefacts & tools	VEHICLES	WHEEL				Loan	Persian
90731	Aghul	Nakh-Dagestanian	68480	Modern language	Modern	urkʰ:aʁ, kʰ:urax	yoke		Cultural artefacts & tools	VEHICLES	YOKE				No loan
72490	Albanian (Tosk)	Indo-European	35300	Modern language	Modern	qep	to sew	v	Activities	ACTIVITIES	TO SEW	72489	sew-4	Unspecified	No loan
73069	Albanian (Tosk)	Indo-European	35300	Modern language	Modern	mbjel	to sow	v	Activities	ACTIVITIES	TO SOW	73068	sow-1	Unspecified	No loan
72105	Albanian (Tosk)	Indo-European	35300	Modern language	Modern	fil	thread	m	Activities	ACTIVITIES	TO SPIN (THREAD)	72017	PIE *gʷhiH-(s-)lo- 'sinew, sinew thread'	Certainly borrowed	Loan	Latin
71521	Albanian (Tosk)	Indo-European	35300	Modern language	Modern	venj	to weave	v	Activities	ACTIVITIES	TO WEAVE	71432	PIE *(h₁)uebh- v 'to weave'	Inherited	No loan
43493	Albanian (Tosk)	Indo-European	35300	Modern language	Modern	ter	bull	m	Farm animals	CATTLE	BULL	54195	bull-1	Inherited	No loan
55382	Albanian (Tosk)	Indo-European	35300	Modern language	Modern	lopë	cow	f	Farm animals	CATTLE	CALF	55341	calf-2	Inherited	No loan
55411	Albanian (Tosk)	Indo-European	35300	Modern language	Modern	meksh	bull-calf	m	Farm animals	CATTLE	CALF	55401	PIE *mogh-u- 'young person'	Inherited	No loan
55414	Albanian (Tosk)	Indo-European	35300	Modern language	Modern	meksh	bison calf	m	Farm animals	CATTLE	CALF	55401	PIE *mogh-u- 'young person'	Inherited	No loan
55531	Albanian (Tosk)	Indo-European	35300	Modern language	Modern	bravë	herd	f	Farm animals	CATTLE	CATTLE	55486	PIE *bhar- : *bhor- : *bhr̥-	Certainly borrowed	Loan	Proto-Slavic
56018	Albanian (Tosk)	Indo-European	35300	Modern language	Modern	gjedh	cattle	m	Farm animals	CATTLE	CATTLE	56017	PIE *sed- v 'to go, to walk'	Inherited	No loan
56062	Albanian (Tosk)	Indo-European	35300	Modern language	Modern	bagëti	herd, flock, sheep	fpl	Farm animals	CATTLE	CATTLE	56061	PSl. bȏgъ m ‘god’	Certainly borrowed	Loan	Proto-Slavic
55534	Albanian (Tosk)	Indo-European	35300	Modern language	Modern	berr	sheep, goat; wether, ram; livestock	m	Farm animals	CATTLE	CATTLE	58160	ram-6	Inherited	No loan
76221	Albanian (Tosk)	Indo-European	35300	Modern language	Modern	fqollë	flax ready for spinning	f	Crops & fruit	CROPS	FLAX	76220	flax-1	Unspecified	Loan	Greek
76305	Albanian (Tosk)	Indo-European	35300	Modern language	Modern	li	flax, linen	m	Crops & fruit	CROPS	FLAX	76222	flax-2	Certainly borrowed	Loan	Latin
76308	Albanian (Tosk)	Indo-European	35300	Modern language	Modern	linjë	linen, linen garment	f	Crops & fruit	CROPS	FLAX	76222	flax-2	Certainly borrowed	Loan	Latin
74360	Albanian (Tosk)	Indo-European	35300	Modern language	Modern	kokërr	berry, grain	f	Crops & fruit	CROPS	GRAIN (GENERIC)	74357	grain-1	Derivation	No loan
74361	Albanian (Tosk)	Indo-European	35300	Modern language	Modern	kokë	head, bulb, berry, grain	f	Crops & fruit	CROPS	GRAIN (GENERIC)	74357	grain-1	Certainly borrowed	Loan	Latin
74745	Albanian (Tosk)	Indo-European	35300	Modern language	Modern	grurë, grunë	wheat	m,n	Crops & fruit	CROPS	GRAIN (GENERIC)	74461	PIE *ǵrh₂-no- 'grain'	Inherited	No loan
74351	Albanian (Tosk)	Indo-European	35300	Modern language	Modern	tërshërë, tërshanë	oats	f	Crops & fruit	CROPS	OATS	73315	PIE *terh₁- v 'to rub'	Certainly borrowed	Loan	Romance (branch)
73924	Albanian (Tosk)	Indo-European	35300	Modern language	Modern	thëkër, thëkën	rye	f	Crops & fruit	CROPS	RYE	73888	rye-2	Certainly borrowed	Loan	Latin
73659	Albanian (Tosk)	Indo-European	35300	Modern language	Modern	bar	grass	m	Crops & fruit	CROPS	BARLEY	73606	barley-2	Inherited	No loan
73753	Albanian (Tosk)	Indo-European	35300	Modern language	Modern	drithë	cereal, grain; wheat	fpl	Crops & fruit	CROPS	BARLEY	73746	barley-3	Inherited	No loan
73880	Albanian (Tosk)	Indo-European	35300	Modern language	Modern	elb	barley	m	Crops & fruit	CROPS	BARLEY	73877	PIE *h₂elbhi- 'barley'	Inherited	No loan
61451	Albanian (Tosk)	Indo-European	35300	Modern language	Modern	mac̷e	cat	f	Farm animals	DOMESTIC ANIMALS	CAT	61450	cat-5	Certainly borrowed	Loan	Serbo-Croatian
61057	Albanian (Tosk)	Indo-European	35300	Modern language	Modern	shakë	dog, bitch	f	Farm animals	DOMESTIC ANIMALS	DOG	60954	PIE *ḱuōn- 'dog'	Certainly borrowed	Loan	Indo-Iranian (branch)
61041	Albanian (Tosk)	Indo-European	35300	Modern language	Modern	qen	dog	m	Farm animals	DOMESTIC ANIMALS	DOG	60954	PIE *ḱuōn- 'dog'	Certainly borrowed	Loan	Romanian
61161	Albanian (Tosk)	Indo-European	35300	Modern language	Modern	kuç	dog	m	Farm animals	DOMESTIC ANIMALS	DOG	60954	PIE *ḱuōn- 'dog'	Certainly borrowed	Loan	Slavic (branch)
61491	Albanian (Tosk)	Indo-European	35300	Modern language	Modern	mjalcë	bee	f	Farm animals	DOMESTIC INSECTS	BEE	61480	PIE *meli- 'honey'	Inherited	No loan
61724	Albanian (Tosk)	Indo-European	35300	Modern language	Modern	bletë	bee; beehive	f	Farm animals	DOMESTIC INSECTS	BEE	61480	PIE *meli- 'honey'	Certainly borrowed	Loan	Vulgar Latin
56988	Albanian (Tosk)	Indo-European	35300	Modern language	Modern	magar, magjar, margaç	donkey	m	Farm animals	DRAFT ANIMALS	DONKEY	56767	donkey-1	Certainly borrowed	Loan	Romanian
57123	Albanian (Tosk)	Indo-European	35300	Modern language	Modern	kërr	donkey, ass; foal; grey	m,adj	Farm animals	DRAFT ANIMALS	DONKEY	57117	donkey-2	Inherited	No loan
56665	Albanian (Tosk)	Indo-European	35300	Modern language	Modern	kalë	horse	m	Farm animals	DRAFT ANIMALS	HORSE	56627	horse-4	Certainly borrowed	Loan	Latin
55067	Albanian (Tosk)	Indo-European	35300	Modern language	Modern	ka	ox	m	Farm animals	DRAFT ANIMALS	OX	55066	PIE *ḱerh₂- 'head, horn'	Unspecified	No loan
55251	Albanian (Tosk)	Indo-European	35300	Modern language	Modern	dem	young bull, bullock	m	Farm animals	DRAFT ANIMALS	OX	55146	PIE *demh₂- v 'to tame'	Inherited	No loan
69413	Albanian (Tosk)	Indo-European	35300	Modern language	Modern	verë	summer	f	Products	DRINK AND DRUGS	WINE	82163	PIE *ues-r-, *ues-n- 'spring'	Certainly borrowed	Loan	Latin
66368	Albanian (Tosk)	Indo-European	35300	Modern language	Modern	drë	deer	m	Wild animals	GAME ANIMALS	DEER	66365	PIE *dhrono- 'speckled, many-coloured, variegated'	Inherited	No loan
66844	Albanian (Tosk)	Indo-European	35300	Modern language	Modern	bishë	beast, animal	n	Wild animals	GAME ANIMALS	DEER	66759	Lat. bēstia f 'beast, animal'	Certainly borrowed	Loan	Latin
33865	Albanian (Tosk)	Indo-European	35300	Modern language	Modern	bri	horn; horn, antlers		Wild animals	GAME ANIMALS	DEER	67250	deer-6	Unspecified	No loan
64495	Albanian (Tosk)	Indo-European	35300	Modern language	Modern	lepur, ljepur	hare	m	Wild animals	GAME ANIMALS	HARE	64457	hare-2	Certainly borrowed	Loan	Latin
64497	Albanian (Tosk)	Indo-European	35300	Modern language	Modern	lepur i gropave	rabbit	m	Wild animals	GAME ANIMALS	HARE	64457	hare-2	Derivation	No loan
86914	Albanian (Tosk)	Indo-European	35300	Modern language	Modern	thyej	to break	v	Weapons etc.	IMPLEMENTS	KNIFE	86898	PIE *ḱēi- v 'to sharpen'	Inherited	No loan
86911	Albanian (Tosk)	Indo-European	35300	Modern language	Modern	thikë	knife	f	Weapons etc.	IMPLEMENTS	KNIFE	86898	PIE *ḱēi- v 'to sharpen'	Inherited	No loan
86924	Albanian (Tosk)	Indo-European	35300	Modern language	Modern	nozikë	knife worn at the belt	f	Weapons etc.	IMPLEMENTS	KNIFE	86922	PIE *h₁noǵh-io-	Certainly borrowed	Loan	Slavic (branch)
78523	Albanian (Tosk)	Indo-European	35300	Modern language	Modern	sharrë	saw	f	Cultural artefacts & tools	IMPLEMENTS	SAW	76818	PIE *ser(p)- 'sickle, cut'	Certainly borrowed	Loan	Latin
76790	Albanian (Tosk)	Indo-European	35300	Modern language	Modern	shat, shatë	hoe, mattock	m,f	Cultural artefacts & tools	IMPLEMENTS	SCYTHE	76721	PIE *sekh₁-ie/o- v 'to cut off'	Inherited	No loan
76802	Albanian (Tosk)	Indo-European	35300	Modern language	Modern	kosë, kostrë	scythe	f	Cultural artefacts & tools	IMPLEMENTS	SCYTHE	76798	scythe-6	Certainly borrowed	Loan	Slavic (branch)
76907	Albanian (Tosk)	Indo-European	35300	Modern language	Modern	drapër	sickle	m	Cultural artefacts & tools	IMPLEMENTS	SICKLE	72810	PIE *drep- v 'to scratch, to tear'	Certainly borrowed	Loan	Classical Greek
77475	Albanian (Tosk)	Indo-European	35300	Modern language	Modern	pallë	pole, club, wahing-stick, sword, mallet	f	Cultural artefacts & tools	IMPLEMENTS	SPADE	77405	PIE *ph₂-n-ǵ- v 'to attach'	Certainly borrowed	Loan	Latin
77488	Albanian (Tosk)	Indo-European	35300	Modern language	Modern	latë	small axe	f	Cultural artefacts & tools	IMPLEMENTS	SPADE	77485	spade-3	Inherited	No loan
77492	Albanian (Tosk)	Indo-European	35300	Modern language	Modern	lopatëz	tadpole		Cultural artefacts & tools	IMPLEMENTS	SPADE	77485	spade-3	Derivation	No loan
77490	Albanian (Tosk)	Indo-European	35300	Modern language	Modern	lopatë	shovel; oar	f	Cultural artefacts & tools	IMPLEMENTS	SPADE	77485	spade-3	Certainly borrowed	Loan	Slavic (branch)
70166	Albanian (Tosk)	Indo-European	35300	Modern language	Modern	mish	meat, flesh	m,n	Products	MATERIALS	MEAT	70147	PIE *mēms- 'meat'	Inherited	No loan
86346	Albanian (Tosk)	Indo-European	35300	Modern language	Modern	lëkurë	skin, hide; leather	f	Metals & materials	MATERIALS	LEATHER	86345	leather-2	Unspecified	No loan
67943	Albanian (Tosk)	Indo-European	35300	Modern language	Modern	gunë	woolen or fur cloak	f	Products	MATERIALS	FUR	67922	fur-1	Certainly borrowed	Loan	Modern Greek
27792	Albanian (Tosk)	Indo-European	35300	Modern language	Modern	dhjamë	fat (organic substance); fat, lard, suet, tallow	f	Products	MATERIALS	GREASE	70977	grease-2	Inherited	No loan
71133	Albanian (Tosk)	Indo-European	35300	Modern language	Modern	yndyrë	grease, fat, oil	f	Products	MATERIALS	GREASE	71038	PIE *ongʷ- v 'to anoint'	Certainly borrowed	Loan	Latin
40192	Albanian (Tosk)	Indo-European	35300	Modern language	Modern	gur	stone; stone, rock	m	Metals & materials	MATERIALS	STONE	85377	PIE *gʷrH-	Inherited	No loan
85540	Albanian (Tosk)	Indo-European	35300	Modern language	Modern	laps	pencil	m	Metals & materials	MATERIALS	STONE	85517	stone-3	Certainly borrowed	Loan	Latin
85594	Albanian (Tosk)	Indo-European	35300	Modern language	Modern	karpë	rock	f	Metals & materials	MATERIALS	STONE	85593	stone-6	Unspecified	No loan
85596	Albanian (Tosk)	Indo-European	35300	Modern language	Modern	shkrep	rock	m	Metals & materials	MATERIALS	STONE	85593	stone-6	Derivation	No loan
85595	Albanian (Tosk)	Indo-European	35300	Modern language	Modern	krep	rock	m	Metals & materials	MATERIALS	STONE	85593	stone-6	Unspecified	No loan
85860	Albanian (Tosk)	Indo-European	35300	Modern language	Modern	lerë	rock slip, boulder		Metals & materials	MATERIALS	STONE	85815	PIE *leh₁- 'stone'	Unspecified	No loan
84922	Albanian (Tosk)	Indo-European	35300	Modern language	Modern	verrë	white poplar	f	Metals & materials	MATERIALS	WOOD	84920	wood-5	Inherited	No loan
84925	Albanian (Tosk)	Indo-European	35300	Modern language	Modern	lëndë	wood (material), timber; material	f	Metals & materials	MATERIALS	WOOD	84924	wood-6	Inherited	No loan
84949	Albanian (Tosk)	Indo-European	35300	Modern language	Modern	mjedhër	mulberry	f	Metals & materials	MATERIALS	WOOD	84930	PIE *medh-ieh₂- 'middle'	Inherited	No loan
40202	Albanian (Tosk)	Indo-European	35300	Modern language	Modern	dru	tree (not log); tree; wood (material)	m,f	Metals & materials	MATERIALS	WOOD	85098	PIE *doru-, *derwo- 'wood, tree'	Inherited	No loan
83567	Albanian (Tosk)	Indo-European	35300	Modern language	Modern	qipër	copper; bronze	f	Metals & materials	METALS	COPPER	83423	copper-3	Certainly borrowed	Loan	Latin
83710	Albanian (Tosk)	Indo-European	35300	Modern language	Modern	rem	copper	m	Metals & materials	METALS	COPPER	83575	PIE *h₂éi-es- 'bronze'	Certainly borrowed	Loan	Italian
84463	Albanian (Tosk)	Indo-European	35300	Modern language	Modern	ar	gold	m	Metals & materials	METALS	GOLD	84398	PIE *h₂é-h₂us-o- n 'glow'	Certainly borrowed	Loan	Latin
83962	Albanian (Tosk)	Indo-European	35300	Modern language	Modern	hekur	iron	m	Metals & materials	METALS	IRON	83961	iron-4	Unspecified	Loan
84138	Albanian (Tosk)	Indo-European	35300	Modern language	Modern	argjënt	silver	m	Metals & materials	METALS	SILVER	83970	PIE *h₂erǵ- 'brilliant white'	Certainly borrowed	Loan	Latin
59743	Albanian (Tosk)	Indo-European	35300	Modern language	Modern	vit	year	m	Farm animals	PIG RAISING	PIG	57920	PIE *wet- 'year'	Unspecified	No loan
59256	Albanian (Tosk)	Indo-European	35300	Modern language	Modern	thi	pig	m	Farm animals	PIG RAISING	PIG	59114	PIE *suH- 'pig'	Inherited	No loan
59758	Albanian (Tosk)	Indo-European	35300	Modern language	Modern	derr	pig, swine (generic)	m	Farm animals	PIG RAISING	PIG	59750	pig-6	Inherited	No loan
59762	Albanian (Tosk)	Indo-European	35300	Modern language	Modern	derk	piglet		Farm animals	PIG RAISING	PIG	59750	pig-6	Inherited	No loan
59767	Albanian (Tosk)	Indo-European	35300	Modern language	Modern	derr i egër, derr te eger	wild boar	m	Farm animals	PIG RAISING	PIG	59750	pig-6	Derivation	No loan
59773	Albanian (Tosk)	Indo-European	35300	Modern language	Modern	dosë	pig, sow	f	Farm animals	PIG RAISING	PIG	59772	pig-7	Unspecified	No loan
59775	Albanian (Tosk)	Indo-European	35300	Modern language	Modern	gak	boar	m	Farm animals	PIG RAISING	PIG	59774	pig-8	Inherited	No loan
59779	Albanian (Tosk)	Indo-European	35300	Modern language	Modern	bimë	young sow		Farm animals	PIG RAISING	PIG	59778	pig-9	Unspecified	Loan
59780	Albanian (Tosk)	Indo-European	35300	Modern language	Modern	bim	piglet		Farm animals	PIG RAISING	PIG	59778	pig-9	Unspecified	Loan
60581	Albanian (Tosk)	Indo-European	35300	Modern language	Modern	pulkë	pullet; turkey	f	Farm animals	POULTRY	CHICKEN	60580	chicken-2	Certainly borrowed	Loan	Bulgarian
60626	Albanian (Tosk)	Indo-European	35300	Modern language	Modern	jariçkë	pullet, chick	f	Farm animals	POULTRY	CHICKEN	88501	PIE *ieh₁-ro- 'year, summer'	Certainly borrowed	Loan	Bulgarian
60921	Albanian (Tosk)	Indo-European	35300	Modern language	Modern	rosë	duck	f	Farm animals	POULTRY	DUCK	60919	duck-4	Unspecified	No loan
60944	Albanian (Tosk)	Indo-European	35300	Modern language	Modern	patë	goose	f	Farm animals	POULTRY	DUCK	60937	duck-7	Unspecified	No loan
60051	Albanian (Tosk)	Indo-European	35300	Modern language	Modern	pulisht, polisht	donkey colt	m	Farm animals	POULTRY	HEN	60000	PIE *put-lo- 'son'	Inherited	No loan
60048	Albanian (Tosk)	Indo-European	35300	Modern language	Modern	pulë	hen; chicken	f	Farm animals	POULTRY	HEN	60000	PIE *put-lo- 'son'	Certainly borrowed	Loan	Romance (branch)
60260	Albanian (Tosk)	Indo-European	35300	Modern language	Modern	glasë	bird droppings	f	Farm animals	POULTRY	ROOSTER	59875	rooster-3	Certainly borrowed	Loan	Proto-Romance
60258	Albanian (Tosk)	Indo-European	35300	Modern language	Modern	gjel	cock, rooster	m	Farm animals	POULTRY	ROOSTER	59875	rooster-3	Certainly borrowed	Loan	Latin
60293	Albanian (Tosk)	Indo-European	35300	Modern language	Modern	kapua, kapue, kapósh	cock, rooster	m	Farm animals	POULTRY	ROOSTER	60289	rooster-4	Certainly borrowed	Loan	Latin
60328	Albanian (Tosk)	Indo-European	35300	Modern language	Modern	kokosh	cock, rooster	m	Farm animals	POULTRY	ROOSTER	60299	rooster-6	Certainly borrowed	Loan	Slavic (branch)
62256	Albanian (Tosk)	Indo-European	35300	Modern language	Modern	meçkë	female bear	f	Wild animals	PREDATOR ANIMALS	BEAR	61738	PIE *médh-u- 'honey, mead'	Certainly borrowed	Loan	Croatian
62223	Albanian (Tosk)	Indo-European	35300	Modern language	Modern	arí	bear	m	Wild animals	PREDATOR ANIMALS	BEAR	62148	PIE *h₂rtḱo- 'bear'	Inherited	No loan
63610	Albanian (Tosk)	Indo-European	35300	Modern language	Modern	ris	lynx	m	Wild animals	PREDATOR ANIMALS	LYNX	63563	lynx-1	Certainly borrowed	Loan	Slavic (branch)
64868	Albanian (Tosk)	Indo-European	35300	Modern language	Modern	gjarpër, gjarpën	snake	m	Wild animals	PREDATOR ANIMALS	SNAKE	64784	PIE *serp-e/o- v 'to creep'	Inherited	No loan
64988	Albanian (Tosk)	Indo-European	35300	Modern language	Modern	ngjalë	eel	f	Wild animals	PREDATOR ANIMALS	SNAKE	64881	PIE *angʷ(h)i- 'snake'	Certainly borrowed	Loan	Latin
61947	Albanian (Tosk)	Indo-European	35300	Modern language	Modern	ujk	wolf	m	Wild animals	PREDATOR ANIMALS	WOLF	61774	PIE *ulkʷo- 'wolf'	Inherited	No loan
64003	Albanian (Tosk)	Indo-European	35300	Modern language	Modern	dhelprë, dhelpën	fox	f	Wild animals	PREDATOR ANIMALS	FOX	63896	fox-1	Inherited	No loan
66239	Albanian (Tosk)	Indo-European	35300	Modern language	Modern	shqiponjë	eagle	f	Wild animals	PREDATOR BIRDS	EAGLE	66238	eagle-3	Derivation	No loan
66240	Albanian (Tosk)	Indo-European	35300	Modern language	Modern	shqipe	eagle	f	Wild animals	PREDATOR BIRDS	EAGLE	66238	eagle-3	Unspecified	No loan
62986	Albanian (Tosk)	Indo-European	35300	Modern language	Modern	sterqokë, stërqoka	jackdaw	f	Wild animals	PREDATOR BIRDS	OWL	62984	owl-15	Derivation	No loan
62985	Albanian (Tosk)	Indo-European	35300	Modern language	Modern	qok, qukë	kind of owl	m	Wild animals	PREDATOR BIRDS	OWL	62984	owl-15	Unspecified	No loan
63007	Albanian (Tosk)	Indo-European	35300	Modern language	Modern	ut	owl	m	Wild animals	PREDATOR BIRDS	OWL	62990	PIE *h₂eus-, *h₂e/ous-n- 'ear'	Certainly borrowed	Loan	Latin
63002	Albanian (Tosk)	Indo-European	35300	Modern language	Modern	hutë, utë	vulture; owl	f	Wild animals	PREDATOR BIRDS	OWL	62990	PIE *h₂eus-, *h₂e/ous-n- 'ear'	Certainly borrowed	Loan	Modern Greek
65743	Albanian (Tosk)	Indo-European	35300	Modern language	Modern	korb	raven	m	Wild animals	PREDATOR BIRDS	RAVEN	65630	PIE *kor- 'raven'	Certainly borrowed	Loan	Latin
68828	Albanian (Tosk)	Indo-European	35300	Modern language	Modern	ëmbël	sweet, mild	adj	Products	PRODUCTS	HONEY	61480	PIE *meli- 'honey'	Inherited	No loan
68825	Albanian (Tosk)	Indo-European	35300	Modern language	Modern	mjal, mjaltë	honey	m	Products	PRODUCTS	HONEY	61480	PIE *meli- 'honey'	Inherited	No loan
69099	Albanian (Tosk)	Indo-European	35300	Modern language	Modern	qumësht	milk, whey	m	Products	PRODUCTS	MILK	69097	milk-1	Certainly borrowed	Loan	Latin
69102	Albanian (Tosk)	Indo-European	35300	Modern language	Modern	hirrë	whey, skimmed milk	f	Products	PRODUCTS	MILK	69101	milk-2	Inherited	No loan
69107	Albanian (Tosk)	Indo-European	35300	Modern language	Modern	djathë	cheese	m	Products	PRODUCTS	MILK	69106	PIE *dhēi- v 'to suck'	Inherited	No loan
69389	Albanian (Tosk)	Indo-European	35300	Modern language	Modern	kripë, krypë	salt	f	Products	PRODUCTS	SALT	69388	salt-1	Inherited	No loan
70144	Albanian (Tosk)	Indo-European	35300	Modern language	Modern	dyllë	wax	m,n	Products	PRODUCTS	WAX (BEES)	70141	PIE *ǵhew- v 'to pour'	Inherited	No loan
67738	Albanian (Tosk)	Indo-European	35300	Modern language	Modern	jarinë	ripe fruit	f	Products	PRODUCTS	WOOL	88501	PIE *ieh₁-ro- 'year, summer'	Certainly borrowed	Loan	Proto-Slavic
83365	Albanian (Tosk)	Indo-European	35300	Modern language	Modern	vjel	to pluck fruit, to vintage	v	Seasons	SEASONS	AUTUMN	83363	autumn-4	Inherited	No loan
83364	Albanian (Tosk)	Indo-European	35300	Modern language	Modern	vjeshtë	autumn	f	Seasons	SEASONS	AUTUMN	83363	autumn-4	Derivation	No loan
82350	Albanian (Tosk)	Indo-European	35300	Modern language	Modern	prëndverë, pranverë	spring	f	Seasons	SEASONS	SPRING	82163	PIE *ues-r-, *ues-n- 'spring'	Certainly borrowed	Loan	Vulgar Latin
69413	Albanian (Tosk)	Indo-European	35300	Modern language	Modern	verë	summer	f	Seasons	SEASONS	SPRING	82163	PIE *ues-r-, *ues-n- 'spring'	Certainly borrowed	Loan	Latin
69413	Albanian (Tosk)	Indo-European	35300	Modern language	Modern	verë	summer	f	Seasons	SEASONS	SUMMER	82163	PIE *ues-r-, *ues-n- 'spring'	Certainly borrowed	Loan	Latin
82854	Albanian (Tosk)	Indo-European	35300	Modern language	Modern	zjarm	fire	m	Seasons	SEASONS	SUMMER	82836	PIE *gʷher-o- 'warmth'	Inherited	No loan
82851	Albanian (Tosk)	Indo-European	35300	Modern language	Modern	zjarr	fire	m	Seasons	SEASONS	SUMMER	82836	PIE *gʷher-o- 'warmth'	Inherited	No loan
82114	Albanian (Tosk)	Indo-European	35300	Modern language	Modern	vërri	winter pasture	f	Seasons	SEASONS	WINTER	81897	PIE *ǵh(e)i-m- 'winter'	Certainly borrowed	Loan	Proto-Romance
81905	Albanian (Tosk)	Indo-European	35300	Modern language	Modern	dimër, dimërë	winter	m	Seasons	SEASONS	WINTER	81897	PIE *ǵh(e)i-m- 'winter'	Inherited	No loan
58529	Albanian (Tosk)	Indo-European	35300	Modern language	Modern	dhi	goat	f	Farm animals	SMALL CATTLE	GOAT	58512	goat-1	Inherited	No loan
58343	Albanian (Tosk)	Indo-European	35300	Modern language	Modern	qengj	lamb	m	Farm animals	SMALL CATTLE	LAMB	58255	PIE *h₂egʷno- 'lamb'	Certainly borrowed	Loan	Vulgar Latin
58064	Albanian (Tosk)	Indo-European	35300	Modern language	Modern	viç	one-year-old calf; calf	m	Farm animals	SMALL CATTLE	RAM	57920	PIE *wet- 'year'	Inherited	No loan
58066	Albanian (Tosk)	Indo-European	35300	Modern language	Modern	ftujë, ftulë, vëtulë	one-year-old she-goat	f	Farm animals	SMALL CATTLE	RAM	57920	PIE *wet- 'year'	Unspecified	No loan
55534	Albanian (Tosk)	Indo-European	35300	Modern language	Modern	berr	sheep, goat; wether, ram; livestock	m	Farm animals	SMALL CATTLE	RAM	58160	ram-6	Inherited	No loan
55531	Albanian (Tosk)	Indo-European	35300	Modern language	Modern	bravë	herd	f	Farm animals	SMALL CATTLE	SHEEP	55486	PIE *bhar- : *bhor- : *bhr̥-	Certainly borrowed	Loan	Proto-Slavic
59079	Albanian (Tosk)	Indo-European	35300	Modern language	Modern	shtjerrë	lamb		Farm animals	SMALL CATTLE	KID	59078	PIE *steruh₁en-	Inherited	No loan
81519	Albanian (Tosk)	Indo-European	35300	Modern language	Modern	arë	field	f	Cultural artefacts & tools	TILLAGE	CULTIVATED FIELD	81514	PIE *h₂eh₁s-eh₁- v 'to be dry'	Inherited	No loan
81599	Albanian (Tosk)	Indo-European	35300	Modern language	Modern	tokë	earth, land soil, ground, plot of land, field	f	Cultural artefacts & tools	TILLAGE	CULTIVATED FIELD	81598	cultivated field-2	Certainly borrowed	Loan	Proto-Slavic
81801	Albanian (Tosk)	Indo-European	35300	Modern language	Modern	brazë, brazdë	furrow	f	Cultural artefacts & tools	TILLAGE	FURROW	81799	furrow-3	Certainly borrowed	Loan	Slavic (branch)
81827	Albanian (Tosk)	Indo-European	35300	Modern language	Modern	hep	furrow, scratch	m	Cultural artefacts & tools	TILLAGE	FURROW	81826	PIE *skep-	Inherited	No loan
81833	Albanian (Tosk)	Indo-European	35300	Modern language	Modern	hollë	thin, fine, slender, slim	adj	Cultural artefacts & tools	TILLAGE	FURROW	81830	PIE *skel- v 'to cut'	Inherited	No loan
81832	Albanian (Tosk)	Indo-European	35300	Modern language	Modern	hulli, holli	furrow	f	Cultural artefacts & tools	TILLAGE	FURROW	81830	PIE *skel- v 'to cut'	Derivation	No loan
77932	Albanian (Tosk)	Indo-European	35300	Modern language	Modern	parmendë, parmenda	plow	f	Cultural artefacts & tools	TILLAGE	PLOW (N)	72491	PIE *h₂erh₃- v 'to plow'	Certainly borrowed	Loan	Romance (branch)
78091	Albanian (Tosk)	Indo-European	35300	Modern language	Modern	plug	plow	m	Cultural artefacts & tools	TILLAGE	PLOW (N)	72644	PGm *plōga- 'plow'	Certainly borrowed	Loan	Slavic (branch)
78094	Albanian (Tosk)	Indo-European	35300	Modern language	Modern	plúar	plow	m	Cultural artefacts & tools	TILLAGE	PLOW (N)	72644	PGm *plōga- 'plow'	Certainly borrowed	Loan	Germanic (branch)
77792	Albanian (Tosk)	Indo-European	35300	Modern language	Modern	helq, heq	to draw, to drag, to pull	v	Cultural artefacts & tools	TILLAGE	PLOW (N)	77754	PIE *solk-o- 'furrow'	Inherited	No loan
77795	Albanian (Tosk)	Indo-European	35300	Modern language	Modern	shluk	blister	m	Cultural artefacts & tools	TILLAGE	PLOW (N)	77754	PIE *solk-o- 'furrow'	Certainly borrowed	Loan	Vulgar Latin
78017	Albanian (Tosk)	Indo-European	35300	Modern language	Modern	umb	plowshare	m	Cultural artefacts & tools	TILLAGE	PLOW (N)	77981	PIE *uogʷhni- 'coulter, plowshare'	Certainly borrowed	Loan	Latin
78015	Albanian (Tosk)	Indo-European	35300	Modern language	Modern	vanga	spade	f	Cultural artefacts & tools	TILLAGE	PLOW (N)	77981	PIE *uogʷhni- 'coulter, plowshare'	Certainly borrowed	Loan	Late Latin
78231	Albanian (Tosk)	Indo-European	35300	Modern language	Modern	thakë	awn, beard, pin, peg, tassel, fringe	m,n	Cultural artefacts & tools	TILLAGE	PLOW (N)	78202	PIE *ḱo(n)kH- 'branch'	Inherited	No loan
43533	Albanian (Tosk)	Indo-European	35300	Modern language	Modern	ah	beech	m	Trees	TREES	ASH	43525		Inherited	No loan
43533	Albanian (Tosk)	Indo-European	35300	Modern language	Modern	ah	beech	m	Trees	TREES	BEECH	43499		Inherited	No loan
43498	Albanian (Tosk)	Indo-European	35300	Modern language	Modern	shparr	a kind of oak	m	Trees	TREES	OAK	87558	PIE *sprH-o- 'spear, beam'	Inherited	No loan
88011	Albanian (Tosk)	Indo-European	35300	Modern language	Modern	shigjetë, shëgjetë	arrow	f	Weapons etc.	WEAPONS	ARROW	87971	arrow-1	Certainly borrowed	Loan	Latin
78937	Albanian (Tosk)	Indo-European	35300	Modern language	Modern	sakë	axe	f	Cultural artefacts & tools	WEAPONS	AXE	78935	axe-8	Derivation	No loan
78936	Albanian (Tosk)	Indo-European	35300	Modern language	Modern	sakicë	small axe		Cultural artefacts & tools	WEAPONS	AXE	78935	axe-8	Derivation	No loan
78938	Albanian (Tosk)	Indo-European	35300	Modern language	Modern	sakavicë	long hook for pulling down branches	f	Cultural artefacts & tools	WEAPONS	AXE	78935	axe-8	Certainly borrowed	Loan	Bulgarian
79070	Albanian (Tosk)	Indo-European	35300	Modern language	Modern	topër	small axe	f	Cultural artefacts & tools	WEAPONS	AXE	79059	axe-9	Certainly borrowed	Loan	Slavic (branch)
79208	Albanian (Tosk)	Indo-European	35300	Modern language	Modern	kep	to hew	v	Cultural artefacts & tools	WEAPONS	AXE	79157	axe-11	Inherited	No loan
86967	Albanian (Tosk)	Indo-European	35300	Modern language	Modern	thadër	double-sided axe	f	Cultural artefacts & tools	WEAPONS	AXE	86966	PIE *ḱs-tro- 'knife'	Inherited	No loan
87926	Albanian (Tosk)	Indo-European	35300	Modern language	Modern	ark	bow; arch	m	Weapons etc.	WEAPONS	BOW	87899	bow-2	Certainly borrowed	Loan	Latin
87508	Albanian (Tosk)	Indo-European	35300	Modern language	Modern	hell, hejë	spear, spit	m	Weapons etc.	WEAPONS	SPEAR	81830	PIE *skel- v 'to cut'	Inherited	No loan
40202	Albanian (Tosk)	Indo-European	35300	Modern language	Modern	dru	tree (not log); tree; wood (material)	m,f	Weapons etc.	WEAPONS	SPEAR	85098	PIE *doru-, *derwo- 'wood, tree'	Inherited	No loan
87317	Albanian (Tosk)	Indo-European	35300	Modern language	Modern	shtizë	spear	f	Weapons etc.	WEAPONS	SPEAR	87506	PIE *kelH- v 'to hew'	Derivation	No loan
87511	Albanian (Tosk)	Indo-European	35300	Modern language	Modern	heshtë	spear	f	Weapons etc.	WEAPONS	SPEAR	87506	PIE *kelH- v 'to hew'	Certainly borrowed	Loan	Latin
87318	Albanian (Tosk)	Indo-European	35300	Modern language	Modern	shtijë	ray, spear	m	Weapons etc.	WEAPONS	SPEAR	87506	PIE *kelH- v 'to hew'	Certainly borrowed	Loan	Latin
87617	Albanian (Tosk)	Indo-European	35300	Modern language	Modern	shpardh, shpardhë	kind of oak	m,f	Weapons etc.	WEAPONS	SPEAR	87558	PIE *sprH-o- 'spear, beam'	Inherited	No loan
87646	Albanian (Tosk)	Indo-European	35300	Modern language	Modern	ber	bow, arrow, spear	m	Weapons etc.	WEAPONS	SPEAR	87645	PIE *bher- v 'to bring, to carry'	Inherited	No loan
88367	Albanian (Tosk)	Indo-European	35300	Modern language	Modern	shpatë	sword	f	Weapons etc.	WEAPONS	SWORD	77155	PIE *sph₂-dh(h₁)- 'blade, spade'	Unspecified	No loan
75518	Albanian (Tosk)	Indo-European	35300	Modern language	Modern	mollë	apple, apple tree	f	Crops & fruit	VEGETABLES & FRUIT	APPLE	75486	apple-1	Certainly borrowed	Loan	Latin
75985	Albanian (Tosk)	Indo-European	35300	Modern language	Modern	dredhë	strawberry		Crops & fruit	VEGETABLES & FRUIT	GRAPE	75933	grape-6	Unspecified	No loan
75980	Albanian (Tosk)	Indo-European	35300	Modern language	Modern	rrush	grape, resin	m	Crops & fruit	VEGETABLES & FRUIT	GRAPE	75933	grape-6	Inherited	No loan
75115	Albanian (Tosk)	Indo-European	35300	Modern language	Modern	repë	turnip	f	Crops & fruit	VEGETABLES & FRUIT	TURNIP	75031	turnip-1	Certainly borrowed	Loan	Slavic (branch)
75112	Albanian (Tosk)	Indo-European	35300	Modern language	Modern	rapë, rrepë	turnip	f	Crops & fruit	VEGETABLES & FRUIT	TURNIP	75031	turnip-1	Certainly borrowed	Loan	Latin
80579	Albanian (Tosk)	Indo-European	35300	Modern language	Modern	ashkë	wood splinter	f	Cultural artefacts & tools	VEHICLES	AXLE	80380	PIE *h₂eḱs-(i-) 'axle, arm-pit'	Inherited	No loan
80765	Albanian (Tosk)	Indo-European	35300	Modern language	Modern	bosht	spindle, axis, axle	m	Cultural artefacts & tools	VEHICLES	AXLE	80764	axle-3	Inherited	No loan
80765	Albanian (Tosk)	Indo-European	35300	Modern language	Modern	bosht	spindle, axis, axle	m	Cultural artefacts & tools	VEHICLES	HUB	80764	axle-3	Inherited	No loan
80974	Albanian (Tosk)	Indo-European	35300	Modern language	Modern	gllavinë	hub, nave	f	Cultural artefacts & tools	VEHICLES	HUB	80973	hub-8	Certainly borrowed	Loan	Slavic (branch)
81072	Albanian (Tosk)	Indo-European	35300	Modern language	Modern	gjeth	foliage, green leaves	m	Cultural artefacts & tools	VEHICLES	HUB	81054	PIE *gʷosdho- 'piece of wood, sprig’	Inherited	No loan
79964	Albanian (Tosk)	Indo-European	35300	Modern language	Modern	qerr	wagon, cart	m	Cultural artefacts & tools	VEHICLES	WAGON	78162	PIE *krso- v 'to run'	Certainly borrowed	Loan	Latin
80312	Albanian (Tosk)	Indo-European	35300	Modern language	Modern	rreth	hoop, wheel rim, circle	m	Cultural artefacts & tools	VEHICLES	WHEEL	80116	PIE *(H)reth₂- v 'to run'	Inherited	No loan
79599	Albanian (Tosk)	Indo-European	35300	Modern language	Modern	jarm	yoke	m	Cultural artefacts & tools	VEHICLES	YOKE	79598	PIE *h₂er- 'join'	Certainly borrowed	Loan	Slavic (branch)
79628	Albanian (Tosk)	Indo-European	35300	Modern language	Modern	zgjedhë	ox yoke	f	Cultural artefacts & tools	VEHICLES	YOKE	79627	yoke-2	Unspecified	No loan
91638	Andi	Nakh-Dagestanian	68469	Modern language	Modern	beq'u	plow		Activities	ACTIVITIES	TO PLOW				No loan
91639	Andi	Nakh-Dagestanian	68469	Modern language	Modern	baxinu	sew		Activities	ACTIVITIES	TO SEW				No loan
91640	Andi	Nakh-Dagestanian	68469	Modern language	Modern	šenšamu	sow		Activities	ACTIVITIES	TO SOW				No loan
91641	Andi	Nakh-Dagestanian	68469	Modern language	Modern	beš:-du	spin (thread)		Activities	ACTIVITIES	TO SPIN (THREAD)				No loan
91642	Andi	Nakh-Dagestanian	68469	Modern language	Modern	beš:-du	weave		Activities	ACTIVITIES	TO WEAVE				No loan
91671	Andi	Nakh-Dagestanian	68469	Modern language	Modern	buɣa	bull		Farm animals	CATTLE	BULL				No loan
91670	Andi	Nakh-Dagestanian	68469	Modern language	Modern	unso	bull		Farm animals	CATTLE	BULL				No loan
91672	Andi	Nakh-Dagestanian	68469	Modern language	Modern	milčʰa	bull		Farm animals	CATTLE	BULL	92096	ox-4	Inherited	No loan
91674	Andi	Nakh-Dagestanian	68469	Modern language	Modern	beč'uxa	cattle		Farm animals	CATTLE	CATTLE				No loan
91676	Andi	Nakh-Dagestanian	68469	Modern language	Modern	ziw	cow		Farm animals	CATTLE	COW	92064	cow-1	Inherited	No loan
91662	Andi	Nakh-Dagestanian	68469	Modern language	Modern	muhu	grain (generic)		Crops & fruit	CROPS	GRAIN (GENERIC)				No loan
91661	Andi	Nakh-Dagestanian	68469	Modern language	Modern	ganga	grain (generic)		Crops & fruit	CROPS	GRAIN (GENERIC)				No loan
91663	Andi	Nakh-Dagestanian	68469	Modern language	Modern	q'ir	grain (generic)		Crops & fruit	CROPS	GRAIN (GENERIC)				No loan
91665	Andi	Nakh-Dagestanian	68469	Modern language	Modern	nixa	oats		Crops & fruit	CROPS	OATS				No loan
91666	Andi	Nakh-Dagestanian	68469	Modern language	Modern	č'or	rye		Crops & fruit	CROPS	RYE	93272	barley-1	Inherited	No loan
91667	Andi	Nakh-Dagestanian	68469	Modern language	Modern	ogob	rye		Crops & fruit	CROPS	RYE	93284	rye-1	Unspecified	No loan
91668	Andi	Nakh-Dagestanian	68469	Modern language	Modern	q'elˇi	wheat		Crops & fruit	CROPS	WHEAT				No loan
91659	Andi	Nakh-Dagestanian	68469	Modern language	Modern	č'or	barley		Crops & fruit	CROPS	BARLEY				No loan
91660	Andi	Nakh-Dagestanian	68469	Modern language	Modern	birč'ina	barley		Crops & fruit	CROPS	BARLEY				No loan
91673	Andi	Nakh-Dagestanian	68469	Modern language	Modern	gedu	cat		Farm animals	DOMESTIC ANIMALS	CAT	92056	cat-3	Inherited	No loan
91677	Andi	Nakh-Dagestanian	68469	Modern language	Modern	xej	dog		Farm animals	DOMESTIC ANIMALS	DOG				No loan
91669	Andi	Nakh-Dagestanian	68469	Modern language	Modern	pʰira	bee		Farm animals	DOMESTIC INSECTS	BEE	92051	bee-4	Inherited	No loan
91678	Andi	Nakh-Dagestanian	68469	Modern language	Modern	amuxi	donkey		Farm animals	DRAFT ANIMALS	DONKEY				No loan
91682	Andi	Nakh-Dagestanian	68469	Modern language	Modern	k'otʰu	horse		Farm animals	DRAFT ANIMALS	HORSE				No loan
91684	Andi	Nakh-Dagestanian	68469	Modern language	Modern	unso	ox		Farm animals	DRAFT ANIMALS	OX				No loan
91704	Andi	Nakh-Dagestanian	68469	Modern language	Modern	hunc':i	mead		Products	DRINK AND DRUGS	MEAD				No loan
91705	Andi	Nakh-Dagestanian	68469	Modern language	Modern	med	mead		Products	DRINK AND DRUGS	MEAD				No loan
91710	Andi	Nakh-Dagestanian	68469	Modern language	Modern	čʰaɣir	wine		Products	DRINK AND DRUGS	WINE				Loan	?
91709	Andi	Nakh-Dagestanian	68469	Modern language	Modern	žono	wine		Products	DRINK AND DRUGS	WINE	92845	wine-2	Inherited	No loan
91733	Andi	Nakh-Dagestanian	68469	Modern language	Modern	x:untʰa	wild pig		Wild animals	GAME ANIMALS	WILD BOAR	93476	wild pig-1	Inherited	No loan
91724	Andi	Nakh-Dagestanian	68469	Modern language	Modern	besun	knife		Weapons etc.	IMPLEMENTS	KNIFE	92525	sickle-1	Inherited	No loan
91652	Andi	Nakh-Dagestanian	68469	Modern language	Modern	quqadir(i)	saw		Cultural artefacts & tools	IMPLEMENTS	SAW				No loan
91653	Andi	Nakh-Dagestanian	68469	Modern language	Modern	qandero	scythe		Cultural artefacts & tools	IMPLEMENTS	SCYTHE				No loan
91654	Andi	Nakh-Dagestanian	68469	Modern language	Modern	ničʰo	sickle		Cultural artefacts & tools	IMPLEMENTS	SICKLE				No loan
91655	Andi	Nakh-Dagestanian	68469	Modern language	Modern	beli	spade		Cultural artefacts & tools	IMPLEMENTS	SPADE				Loan	?
91706	Andi	Nakh-Dagestanian	68469	Modern language	Modern	rilʻˇ:i	meat		Products	MATERIALS	MEAT				No loan
91694	Andi	Nakh-Dagestanian	68469	Modern language	Modern	c':ukʰu	leather		Metals & materials	MATERIALS	LEATHER				No loan
91696	Andi	Nakh-Dagestanian	68469	Modern language	Modern	q'eqi	leather		Metals & materials	MATERIALS	LEATHER				No loan
91695	Andi	Nakh-Dagestanian	68469	Modern language	Modern	surom	leather		Metals & materials	MATERIALS	LEATHER				No loan
91702	Andi	Nakh-Dagestanian	68469	Modern language	Modern	xučʰa	fur		Products	MATERIALS	FUR				No loan
91701	Andi	Nakh-Dagestanian	68469	Modern language	Modern	tʰaxtʰa	fur		Products	MATERIALS	FUR				No loan
91698	Andi	Nakh-Dagestanian	68469	Modern language	Modern	hinc'o	stone		Metals & materials	MATERIALS	STONE				No loan
91699	Andi	Nakh-Dagestanian	68469	Modern language	Modern	lʻudi	wood		Metals & materials	MATERIALS	WOOD				No loan
91691	Andi	Nakh-Dagestanian	68469	Modern language	Modern	jezi	copper		Metals & materials	METALS	COPPER				No loan
91690	Andi	Nakh-Dagestanian	68469	Modern language	Modern	hir	copper		Metals & materials	METALS	COPPER	93080	iron-1	Inherited	No loan
91692	Andi	Nakh-Dagestanian	68469	Modern language	Modern	misidi	gold		Metals & materials	METALS	GOLD	93096	gold-2	Inherited	No loan
91693	Andi	Nakh-Dagestanian	68469	Modern language	Modern	kʰ:ub, kʰ:uwi	iron		Metals & materials	METALS	IRON				No loan
91697	Andi	Nakh-Dagestanian	68469	Modern language	Modern	orsi	silver		Metals & materials	METALS	SILVER	93088	silver-3	Inherited	No loan
91686	Andi	Nakh-Dagestanian	68469	Modern language	Modern	xunt'a	pig		Farm animals	PIG RAISING	PIG				No loan
91685	Andi	Nakh-Dagestanian	68469	Modern language	Modern	bolʻoni	pig		Farm animals	PIG RAISING	PIG				No loan
91675	Andi	Nakh-Dagestanian	68469	Modern language	Modern	boši	chicken		Farm animals	POULTRY	CHICKEN				No loan
91679	Andi	Nakh-Dagestanian	68469	Modern language	Modern	babuši, baduši	duck		Farm animals	POULTRY	DUCK				No loan
91681	Andi	Nakh-Dagestanian	68469	Modern language	Modern	eʼecʰu	hen		Farm animals	POULTRY	HEN				No loan
91728	Andi	Nakh-Dagestanian	68469	Modern language	Modern	sej	bear		Wild animals	PREDATOR ANIMALS	BEAR				No loan
91731	Andi	Nakh-Dagestanian	68469	Modern language	Modern	ɣalbac'i	lion		Wild animals	PREDATOR ANIMALS	LION				No loan
91732	Andi	Nakh-Dagestanian	68469	Modern language	Modern	berkʰa	snake		Wild animals	PREDATOR ANIMALS	SNAKE				No loan
91734	Andi	Nakh-Dagestanian	68469	Modern language	Modern	boc'o	wolf		Wild animals	PREDATOR ANIMALS	WOLF	93480	wolf-3	Inherited	No loan
91730	Andi	Nakh-Dagestanian	68469	Modern language	Modern	sori	fox		Wild animals	PREDATOR ANIMALS	FOX	93485	jackal-1	Inherited	No loan
91729	Andi	Nakh-Dagestanian	68469	Modern language	Modern	c':uji, c':un	eagle		Wild animals	PREDATOR BIRDS	EAGLE				No loan
91703	Andi	Nakh-Dagestanian	68469	Modern language	Modern	hunc':i	honey		Products	PRODUCTS	HONEY	92833	honey-1	Inherited	No loan
91707	Andi	Nakh-Dagestanian	68469	Modern language	Modern	šiw	milk		Products	PRODUCTS	MILK				No loan
91708	Andi	Nakh-Dagestanian	68469	Modern language	Modern	c':on	salt		Products	PRODUCTS	SALT	92843	salt-2	Inherited	No loan
91700	Andi	Nakh-Dagestanian	68469	Modern language	Modern	š:iwi, š:ir	beeswax		Products	PRODUCTS	WAX (BEES)				No loan
91711	Andi	Nakh-Dagestanian	68469	Modern language	Modern	xurši	wool		Products	PRODUCTS	WOOL				No loan
91713	Andi	Nakh-Dagestanian	68469	Modern language	Modern	čʰalˇi	wool		Products	PRODUCTS	WOOL				No loan
91712	Andi	Nakh-Dagestanian	68469	Modern language	Modern	mixi	wool		Products	PRODUCTS	WOOL				No loan
91714	Andi	Nakh-Dagestanian	68469	Modern language	Modern	šal	wool		Products	PRODUCTS	WOOL				Loan	?
91715	Andi	Nakh-Dagestanian	68469	Modern language	Modern	s:ibira	autumn / harvest		Seasons	SEASONS	AUTUMN	93807	winter-2	Inherited	No loan
91715	Andi	Nakh-Dagestanian	68469	Modern language	Modern	s:ibira	autumn / harvest		Seasons	SEASONS	HARVEST	93807	winter-2	Inherited	No loan
91716	Andi	Nakh-Dagestanian	68469	Modern language	Modern	ribu, rebu, riwa	spring		Seasons	SEASONS	SPRING				No loan
91717	Andi	Nakh-Dagestanian	68469	Modern language	Modern	q'inu	summer		Seasons	SEASONS	SUMMER	93809	summer-1	Inherited	No loan
91718	Andi	Nakh-Dagestanian	68469	Modern language	Modern	l'ˇ:inu	winter		Seasons	SEASONS	WINTER	93808	winter-3	Inherited	No loan
91680	Andi	Nakh-Dagestanian	68469	Modern language	Modern	c':ija	goat		Farm animals	SMALL CATTLE	GOAT	92080	goat-6	Inherited	No loan
91683	Andi	Nakh-Dagestanian	68469	Modern language	Modern	bura	lamb		Farm animals	SMALL CATTLE	LAMB				No loan
91687	Andi	Nakh-Dagestanian	68469	Modern language	Modern	kʰun	ram		Farm animals	SMALL CATTLE	RAM				No loan
91689	Andi	Nakh-Dagestanian	68469	Modern language	Modern	hajman	sheep		Farm animals	SMALL CATTLE	SHEEP				Loan	?
91688	Andi	Nakh-Dagestanian	68469	Modern language	Modern	dan	sheep		Farm animals	SMALL CATTLE	SHEEP				Loan	?
92440	Andi	Nakh-Dagestanian	68469	Modern language	Modern	ixo	sheep, ewe		Farm animals	SMALL CATTLE	SHEEP	92107	sheep-2	Inherited	No loan
91646	Andi	Nakh-Dagestanian	68469	Modern language	Modern	alaxi	cultivated field		Cultural artefacts & tools	TILLAGE	CULTIVATED FIELD				No loan
91647	Andi	Nakh-Dagestanian	68469	Modern language	Modern	xur	cultivated field		Cultural artefacts & tools	TILLAGE	CULTIVATED FIELD	92512	field-2	Inherited	No loan
91651	Andi	Nakh-Dagestanian	68469	Modern language	Modern	beq'u	plow		Cultural artefacts & tools	TILLAGE	PLOW (N)				No loan
91719	Andi	Nakh-Dagestanian	68469	Modern language	Modern	askʰar	army		Weapons etc.	WEAPONS	ARMY				Loan	?
91720	Andi	Nakh-Dagestanian	68469	Modern language	Modern	lʻer (c'en)	arrow		Weapons etc.	WEAPONS	ARROW				No loan
91645	Andi	Nakh-Dagestanian	68469	Modern language	Modern	anǯit'i, anǯidi	axe		Cultural artefacts & tools	WEAPONS	AXE				No loan
91723	Andi	Nakh-Dagestanian	68469	Modern language	Modern	dallarɣa	bow		Weapons etc.	WEAPONS	BOW				No loan
91725	Andi	Nakh-Dagestanian	68469	Modern language	Modern	tʰalq'an	shield		Weapons etc.	WEAPONS	SHIELD				Loan	?
91726	Andi	Nakh-Dagestanian	68469	Modern language	Modern	erqwa	spear		Weapons etc.	WEAPONS	SPEAR				No loan
91727	Andi	Nakh-Dagestanian	68469	Modern language	Modern	x:elčʰan	sword		Weapons etc.	WEAPONS	SWORD				No loan
91664	Andi	Nakh-Dagestanian	68469	Modern language	Modern	č'ič'i, č'ič'ili	grape		Crops & fruit	VEGETABLES & FRUIT	GRAPE				No loan
91656	Andi	Nakh-Dagestanian	68469	Modern language	Modern	ɣirɣil	wheel		Cultural artefacts & tools	VEHICLES	WHEEL				No loan
91657	Andi	Nakh-Dagestanian	68469	Modern language	Modern	č'urigi	wheel		Cultural artefacts & tools	VEHICLES	WHEEL				No loan
91658	Andi	Nakh-Dagestanian	68469	Modern language	Modern	rul'ˇ:u	yoke		Cultural artefacts & tools	VEHICLES	YOKE				No loan
91523	Avar	Nakh-Dagestanian	68468	Modern language	Modern	qo-zi	plow; to plow		Activities	ACTIVITIES	TO PLOW				No loan
91522	Avar	Nakh-Dagestanian	68468	Modern language	Modern	beq'-ize	plow		Activities	ACTIVITIES	TO PLOW				No loan
91524	Avar	Nakh-Dagestanian	68468	Modern language	Modern	buq'-ize	sew		Activities	ACTIVITIES	TO SEW				No loan
91525	Avar	Nakh-Dagestanian	68468	Modern language	Modern	š:wa-ze	sow		Activities	ACTIVITIES	TO SOW				No loan
91526	Avar	Nakh-Dagestanian	68468	Modern language	Modern	durɣ-ize	spin (thread)		Activities	ACTIVITIES	TO SPIN (THREAD)				No loan
91527	Avar	Nakh-Dagestanian	68468	Modern language	Modern	bes:-ize	weave		Activities	ACTIVITIES	TO WEAVE				No loan
91561	Avar	Nakh-Dagestanian	68468	Modern language	Modern	ocʰ	bull		Farm animals	CATTLE	BULL				No loan
91563	Avar	Nakh-Dagestanian	68468	Modern language	Modern	buɣa	bull		Farm animals	CATTLE	BULL				Loan	?
91562	Avar	Nakh-Dagestanian	68468	Modern language	Modern	dana	bull		Farm animals	CATTLE	BULL				Loan	?
91586	Avar	Nakh-Dagestanian	68468	Modern language	Modern	boc'i	sheep; cattle		Farm animals	CATTLE	CATTLE	92111	cattle-4	Inherited	No loan
91568	Avar	Nakh-Dagestanian	68468	Modern language	Modern	ωakʰa	cow		Farm animals	CATTLE	COW	92097	ox-5	Inherited	No loan
91550	Avar	Nakh-Dagestanian	68468	Modern language	Modern	t'orš:el	grain (generic)		Crops & fruit	CROPS	GRAIN (GENERIC)				No loan
91551	Avar	Nakh-Dagestanian	68468	Modern language	Modern	muh	grain (generic)		Crops & fruit	CROPS	GRAIN (GENERIC)				No loan
91554	Avar	Nakh-Dagestanian	68468	Modern language	Modern	ox	oats		Crops & fruit	CROPS	OATS				No loan
91553	Avar	Nakh-Dagestanian	68468	Modern language	Modern	nixa	oats		Crops & fruit	CROPS	OATS				No loan
91556	Avar	Nakh-Dagestanian	68468	Modern language	Modern	guωuli	oats		Crops & fruit	CROPS	OATS				No loan
91555	Avar	Nakh-Dagestanian	68468	Modern language	Modern	buωa	oats		Crops & fruit	CROPS	OATS				Loan	?
91557	Avar	Nakh-Dagestanian	68468	Modern language	Modern	ogob, ugub, oɣorolʻ	rye		Crops & fruit	CROPS	RYE	93284	rye-1	Inherited	No loan
91559	Avar	Nakh-Dagestanian	68468	Modern language	Modern	rolʻ	wheat		Crops & fruit	CROPS	WHEAT	93277	oats-1	Inherited	No loan
91548	Avar	Nakh-Dagestanian	68468	Modern language	Modern	pʰurč'ina	barley		Crops & fruit	CROPS	BARLEY				No loan
91549	Avar	Nakh-Dagestanian	68468	Modern language	Modern	buωa	barley		Crops & fruit	CROPS	BARLEY				Loan	?
91564	Avar	Nakh-Dagestanian	68468	Modern language	Modern	kʰetʰu	cat		Farm animals	DOMESTIC ANIMALS	CAT	92056	cat-3	Inherited	No loan
91570	Avar	Nakh-Dagestanian	68468	Modern language	Modern	hwe	dog		Farm animals	DOMESTIC ANIMALS	DOG				No loan
91571	Avar	Nakh-Dagestanian	68468	Modern language	Modern	kʰoωo	dog		Farm animals	DOMESTIC ANIMALS	DOG				No loan
91569	Avar	Nakh-Dagestanian	68468	Modern language	Modern	hoj	dog		Farm animals	DOMESTIC ANIMALS	DOG				No loan
91560	Avar	Nakh-Dagestanian	68468	Modern language	Modern	naj	bee		Farm animals	DOMESTIC INSECTS	BEE				No loan
91572	Avar	Nakh-Dagestanian	68468	Modern language	Modern	ħama	donkey		Farm animals	DRAFT ANIMALS	DONKEY				No loan
91577	Avar	Nakh-Dagestanian	68468	Modern language	Modern	ωala	horse		Farm animals	DRAFT ANIMALS	HORSE				No loan
91578	Avar	Nakh-Dagestanian	68468	Modern language	Modern	čʰu	horse		Farm animals	DRAFT ANIMALS	HORSE	92089	horse-4	Inherited	No loan
91581	Avar	Nakh-Dagestanian	68468	Modern language	Modern	ocʰ	ox		Farm animals	DRAFT ANIMALS	OX				No loan
91607	Avar	Nakh-Dagestanian	68468	Modern language	Modern	med	mead		Products	DRINK AND DRUGS	MEAD				No loan
91606	Avar	Nakh-Dagestanian	68468	Modern language	Modern	ɣaga	mead		Products	DRINK AND DRUGS	MEAD				No loan
91612	Avar	Nakh-Dagestanian	68468	Modern language	Modern	čʰaɣir	wine		Products	DRINK AND DRUGS	WINE				Loan	?
91611	Avar	Nakh-Dagestanian	68468	Modern language	Modern	ža	wine		Products	DRINK AND DRUGS	WINE	92845	wine-2	Inherited	No loan
91636	Avar	Nakh-Dagestanian	68468	Modern language	Modern	qaban	wild pig		Wild animals	GAME ANIMALS	WILD BOAR				Loan	?
91626	Avar	Nakh-Dagestanian	68468	Modern language	Modern	ωuč'	knife		Weapons etc.	IMPLEMENTS	KNIFE				No loan
91627	Avar	Nakh-Dagestanian	68468	Modern language	Modern	nus	knife		Weapons etc.	IMPLEMENTS	KNIFE	92525	sickle-1	Inherited	No loan
91538	Avar	Nakh-Dagestanian	68468	Modern language	Modern	quqadiro	saw		Cultural artefacts & tools	IMPLEMENTS	SAW				No loan
91539	Avar	Nakh-Dagestanian	68468	Modern language	Modern	xaricʰel	scythe		Cultural artefacts & tools	IMPLEMENTS	SCYTHE	92522	scythe-1	Derivation	No loan
91540	Avar	Nakh-Dagestanian	68468	Modern language	Modern	nilʻ	sickle		Cultural artefacts & tools	IMPLEMENTS	SICKLE				No loan
91542	Avar	Nakh-Dagestanian	68468	Modern language	Modern	buhun	spade		Cultural artefacts & tools	IMPLEMENTS	SPADE				No loan
91541	Avar	Nakh-Dagestanian	68468	Modern language	Modern	bel	spade		Cultural artefacts & tools	IMPLEMENTS	SPADE				Loan	?
91608	Avar	Nakh-Dagestanian	68468	Modern language	Modern	han	meat		Products	MATERIALS	MEAT				No loan
91594	Avar	Nakh-Dagestanian	68468	Modern language	Modern	qwac'a	leather		Metals & materials	MATERIALS	LEATHER				No loan
91595	Avar	Nakh-Dagestanian	68468	Modern language	Modern	lakʰaj	leather		Metals & materials	MATERIALS	LEATHER				No loan
91592	Avar	Nakh-Dagestanian	68468	Modern language	Modern	tʰom	leather		Metals & materials	MATERIALS	LEATHER				No loan
91593	Avar	Nakh-Dagestanian	68468	Modern language	Modern	qal	leather		Metals & materials	MATERIALS	LEATHER				No loan
91601	Avar	Nakh-Dagestanian	68468	Modern language	Modern	q'eq	fur		Products	MATERIALS	FUR				No loan
91602	Avar	Nakh-Dagestanian	68468	Modern language	Modern	c'okʰo	fur		Products	MATERIALS	FUR				No loan
91604	Avar	Nakh-Dagestanian	68468	Modern language	Modern	moxmox	grease		Products	MATERIALS	GREASE				No loan
91603	Avar	Nakh-Dagestanian	68468	Modern language	Modern	t'at'i	grease		Products	MATERIALS	GREASE				No loan
91597	Avar	Nakh-Dagestanian	68468	Modern language	Modern	gamač'	stone		Metals & materials	MATERIALS	STONE				No loan
91598	Avar	Nakh-Dagestanian	68468	Modern language	Modern	ωuc':	stone		Metals & materials	MATERIALS	STONE				No loan
91599	Avar	Nakh-Dagestanian	68468	Modern language	Modern	c'ul	wood		Metals & materials	MATERIALS	WOOD				No loan
91589	Avar	Nakh-Dagestanian	68468	Modern language	Modern	mazgar	copper		Metals & materials	METALS	COPPER				No loan
91588	Avar	Nakh-Dagestanian	68468	Modern language	Modern	pʰaχ	copper		Metals & materials	METALS	COPPER	93074	copper-4	Inherited	No loan
91590	Avar	Nakh-Dagestanian	68468	Modern language	Modern	mesed	gold		Metals & materials	METALS	GOLD	93096	gold-2	Inherited	No loan
91591	Avar	Nakh-Dagestanian	68468	Modern language	Modern	max:	iron		Metals & materials	METALS	IRON	93097	iron-5	Inherited	No loan
91596	Avar	Nakh-Dagestanian	68468	Modern language	Modern	ωaracʰ	silver		Metals & materials	METALS	SILVER	93088	silver-3	Inherited	No loan
91582	Avar	Nakh-Dagestanian	68468	Modern language	Modern	bolʻ-on	pig		Farm animals	PIG RAISING	PIG	92098		Inherited	No loan
91583	Avar	Nakh-Dagestanian	68468	Modern language	Modern	bolʻonit'inč'	piglet		Farm animals	PIG RAISING	PIGLET				No loan
91566	Avar	Nakh-Dagestanian	68468	Modern language	Modern	ωank'udul	chicken		Farm animals	POULTRY	CHICKEN				No loan
91567	Avar	Nakh-Dagestanian	68468	Modern language	Modern	ǯuǯa	chicken		Farm animals	POULTRY	CHICKEN	92062	chicken-2	Inherited	No loan
91573	Avar	Nakh-Dagestanian	68468	Modern language	Modern	ordekʰ	duck		Farm animals	POULTRY	DUCK				Loan	?
91576	Avar	Nakh-Dagestanian	68468	Modern language	Modern	ωank'u	hen		Farm animals	POULTRY	HEN				No loan
91631	Avar	Nakh-Dagestanian	68468	Modern language	Modern	cʰi	bear		Wild animals	PREDATOR ANIMALS	BEAR	93473	bear-1	Inherited	No loan
91634	Avar	Nakh-Dagestanian	68468	Modern language	Modern	ɣalbac'	lion		Wild animals	PREDATOR ANIMALS	LION				No loan
91635	Avar	Nakh-Dagestanian	68468	Modern language	Modern	boroq	snake		Wild animals	PREDATOR ANIMALS	SNAKE				No loan
91637	Avar	Nakh-Dagestanian	68468	Modern language	Modern	bac'	wolf		Wild animals	PREDATOR ANIMALS	WOLF	93480	wolf-3	Inherited	No loan
91633	Avar	Nakh-Dagestanian	68468	Modern language	Modern	cʰer	fox		Wild animals	PREDATOR ANIMALS	FOX	93485	jackal-1	Inherited	No loan
91632	Avar	Nakh-Dagestanian	68468	Modern language	Modern	c':um, c':un	eagle		Wild animals	PREDATOR BIRDS	EAGLE				No loan
91605	Avar	Nakh-Dagestanian	68468	Modern language	Modern	hoc'o, hoc':o	honey		Products	PRODUCTS	HONEY	92833	honey-1	Inherited	No loan
91609	Avar	Nakh-Dagestanian	68468	Modern language	Modern	raq	milk		Products	PRODUCTS	MILK				No loan
91610	Avar	Nakh-Dagestanian	68468	Modern language	Modern	c':am, c':an	salt		Products	PRODUCTS	SALT	92843	salt-2	Inherited	No loan
91600	Avar	Nakh-Dagestanian	68468	Modern language	Modern	ħe, ħoj	beeswax		Products	PRODUCTS	WAX (BEES)				No loan
91613	Avar	Nakh-Dagestanian	68468	Modern language	Modern	kʰwas	wool		Products	PRODUCTS	WOOL				No loan
91614	Avar	Nakh-Dagestanian	68468	Modern language	Modern	c'ira	wool		Products	PRODUCTS	WOOL				No loan
91615	Avar	Nakh-Dagestanian	68468	Modern language	Modern	xasel, xesel	autumn / harvest		Seasons	SEASONS	AUTUMN				Loan	?
91615	Avar	Nakh-Dagestanian	68468	Modern language	Modern	xasel, xesel	autumn / harvest		Seasons	SEASONS	HARVEST				Loan	?
91616	Avar	Nakh-Dagestanian	68468	Modern language	Modern	ix, ix:	spring		Seasons	SEASONS	SPRING				No loan
91617	Avar	Nakh-Dagestanian	68468	Modern language	Modern	rihi	summer		Seasons	SEASONS	SUMMER				No loan
91619	Avar	Nakh-Dagestanian	68468	Modern language	Modern	xasel	winter		Seasons	SEASONS	WINTER				No loan
91618	Avar	Nakh-Dagestanian	68468	Modern language	Modern	l'ˇ:in	winter		Seasons	SEASONS	WINTER	93808	winter-3	Inherited	No loan
91574	Avar	Nakh-Dagestanian	68468	Modern language	Modern	deωen	goat		Farm animals	SMALL CATTLE	GOAT	92079	goat-4	Inherited	No loan
91575	Avar	Nakh-Dagestanian	68468	Modern language	Modern	c':e	goat		Farm animals	SMALL CATTLE	GOAT	92080	goat-6	Inherited	No loan
91580	Avar	Nakh-Dagestanian	68468	Modern language	Modern	xux	lamb		Farm animals	SMALL CATTLE	LAMB				No loan
91579	Avar	Nakh-Dagestanian	68468	Modern language	Modern	q'eωer	lamb		Farm animals	SMALL CATTLE	LAMB				No loan
91584	Avar	Nakh-Dagestanian	68468	Modern language	Modern	kʰuj, kʰwi, kʰu	ram		Farm animals	SMALL CATTLE	RAM				No loan
91585	Avar	Nakh-Dagestanian	68468	Modern language	Modern	lemag	sheep		Farm animals	SMALL CATTLE	SHEEP				No loan
91587	Avar	Nakh-Dagestanian	68468	Modern language	Modern	nebgal	sheep		Farm animals	SMALL CATTLE	SHEEP	92106	sheep-1	Inherited	No loan
91586	Avar	Nakh-Dagestanian	68468	Modern language	Modern	boc'i	sheep; cattle		Farm animals	SMALL CATTLE	SHEEP	92111	cattle-4	Inherited	No loan
91531	Avar	Nakh-Dagestanian	68468	Modern language	Modern	meh	cultivated field		Cultural artefacts & tools	TILLAGE	CULTIVATED FIELD				No loan
91532	Avar	Nakh-Dagestanian	68468	Modern language	Modern	xur	cultivated field		Cultural artefacts & tools	TILLAGE	CULTIVATED FIELD	92512	field-2	Inherited	No loan
91536	Avar	Nakh-Dagestanian	68468	Modern language	Modern	beq'-ize	plow		Cultural artefacts & tools	TILLAGE	PLOW (N)				No loan
91523	Avar	Nakh-Dagestanian	68468	Modern language	Modern	qo-zi	plow; to plow		Cultural artefacts & tools	TILLAGE	PLOW (N)				No loan
91621	Avar	Nakh-Dagestanian	68468	Modern language	Modern	q'ošun	army		Weapons etc.	WEAPONS	ARMY				Loan	?
91622	Avar	Nakh-Dagestanian	68468	Modern language	Modern	askʰar	army		Weapons etc.	WEAPONS	ARMY				Loan	?
91620	Avar	Nakh-Dagestanian	68468	Modern language	Modern	bo	army		Weapons etc.	WEAPONS	ARMY	93884	army-2	Inherited	No loan
91623	Avar	Nakh-Dagestanian	68468	Modern language	Modern	č'or	arrow		Weapons etc.	WEAPONS	ARROW				No loan
91530	Avar	Nakh-Dagestanian	68468	Modern language	Modern	ωaš:t'i	axe		Cultural artefacts & tools	WEAPONS	AXE				No loan
91625	Avar	Nakh-Dagestanian	68468	Modern language	Modern	č'orbut'	bow		Weapons etc.	WEAPONS	BOW				No loan
91628	Avar	Nakh-Dagestanian	68468	Modern language	Modern	tʰalq'an	shield		Weapons etc.	WEAPONS	SHIELD				Loan	?
91629	Avar	Nakh-Dagestanian	68468	Modern language	Modern	xečʰ	spear		Weapons etc.	WEAPONS	SPEAR				No loan
91630	Avar	Nakh-Dagestanian	68468	Modern language	Modern	xwalčʰen	sword		Weapons etc.	WEAPONS	SWORD				No loan
91547	Avar	Nakh-Dagestanian	68468	Modern language	Modern	ωečʰ	apple		Crops & fruit	VEGETABLES & FRUIT	APPLE				No loan
91552	Avar	Nakh-Dagestanian	68468	Modern language	Modern	c':ibil	grape		Crops & fruit	VEGETABLES & FRUIT	GRAPE				No loan
91558	Avar	Nakh-Dagestanian	68468	Modern language	Modern	tʰalgar	turnip		Crops & fruit	VEGETABLES & FRUIT	TURNIP				No loan
91543	Avar	Nakh-Dagestanian	68468	Modern language	Modern	hakʰiber	wheel		Cultural artefacts & tools	VEHICLES	WHEEL				No loan
91545	Avar	Nakh-Dagestanian	68468	Modern language	Modern	čʰarx	wheel		Cultural artefacts & tools	VEHICLES	WHEEL				Loan	?
91544	Avar	Nakh-Dagestanian	68468	Modern language	Modern	ber	wheel		Cultural artefacts & tools	VEHICLES	WHEEL	92532	wheel-2	Inherited	No loan
91546	Avar	Nakh-Dagestanian	68468	Modern language	Modern	ruḷˇ:	yoke		Cultural artefacts & tools	VEHICLES	YOKE				No loan
73071	Avestan	Indo-European	50700	Dead (well documented)	Ancient	vīvāpa-	laid waste, destruction	m	Activities	ACTIVITIES	TO SOW	73070	sow-2	Unspecified	No loan
73081	Avestan	Indo-European	50700	Dead (well documented)	Ancient	kar-	to strew; to sow, to cultivate	v	Activities	ACTIVITIES	TO SOW	73080	sow-3	Unspecified	No loan
71928	Avestan	Indo-European	50700	Dead (well documented)	Ancient	pairi-tan-	to extend, stretch	v	Activities	ACTIVITIES	TO SPIN (THREAD)	71919	PIE *ten- v 'to draw, stretch'	Inherited	No loan
71530	Avestan	Indo-European	50700	Dead (well documented)	Ancient	vaf-	to praise, sing to ('weave in words')	v	Activities	ACTIVITIES	TO WEAVE	71432	PIE *(h₁)uebh- v 'to weave'	Inherited	No loan
71532	Avestan	Indo-European	50700	Dead (well documented)	Ancient	ubdaēna-	made from woven material		Activities	ACTIVITIES	TO WEAVE	71432	PIE *(h₁)uebh- v 'to weave'	Unspecified	No loan
71610	Avestan	Indo-European	50700	Dead (well documented)	Ancient	tāšt	to fashion	v	Activities	ACTIVITIES	TO WEAVE	71546	PIE *teḱ-s- v 'to hew, to fabricate'	Inherited	No loan
71716	Avestan	Indo-European	50700	Dead (well documented)	Ancient	naδa-	headgear		Activities	ACTIVITIES	TO WEAVE	71710	PIE *nōdo- 'knot'	Inherited	No loan
71715	Avestan	Indo-European	50700	Dead (well documented)	Ancient	naska-	collection of texts		Activities	ACTIVITIES	TO WEAVE	71710	PIE *nōdo- 'knot'	Unspecified	No loan
71802	Avestan	Indo-European	50700	Dead (well documented)	Ancient	ərəzatō-frašna-	having a silver helmet	adj	Activities	ACTIVITIES	TO WEAVE	71719	PIE *pleḱ- 'twine'	Inherited	No loan
43491	Avestan	Indo-European	50700	Dead (well documented)	Ancient	staora-	big cattle; camel, horse, bovine and donkey	m	Farm animals	CATTLE	BULL	54367	bull-2	Unspecified	No loan
55269	Avestan	Indo-European	50700	Dead (well documented)	Ancient	garəβa-	womb	m	Farm animals	CATTLE	CALF	55264	calf-1	Inherited	No loan
55267	Avestan	Indo-European	50700	Dead (well documented)	Ancient	gərəbuš-	young animal		Farm animals	CATTLE	CALF	55264	calf-1	Inherited	No loan
55417	Avestan	Indo-European	50700	Dead (well documented)	Ancient	maγava-	unmarried		Farm animals	CATTLE	CALF	55401	PIE *mogh-u- 'young person'	Inherited	No loan
55563	Avestan	Indo-European	50700	Dead (well documented)	Ancient	dam-	house		Farm animals	CATTLE	CATTLE	55554	PIE *dṓm- 'house'	Inherited	No loan
55780	Avestan	Indo-European	50700	Dead (well documented)	Ancient	pasu-	cattle; domestic animal, sheep	m	Farm animals	CATTLE	CATTLE	55696	PIE *peḱ-u- 'cattle'	Inherited	No loan
54787	Avestan	Indo-European	50700	Dead (well documented)	Ancient	gav-	cow; bull; cattle	f,m	Farm animals	CATTLE	COW	54635	PIE *gʷeh₃-u- 'cow'	Unspecified	No loan
54786	Avestan	Indo-European	50700	Dead (well documented)	Ancient	gav-	cattle; bull; cow	m,f	Farm animals	CATTLE	COW	54635	PIE *gʷeh₃-u- 'cow'	Unspecified	No loan
54914	Avestan	Indo-European	50700	Dead (well documented)	Ancient	azī-	with young (of cows or mares); milking (of cows and mares)		Farm animals	CATTLE	COW	54890	PIE *h₂eǵHo- 'cow'	Inherited	No loan
74749	Avestan	Indo-European	50700	Dead (well documented)	Ancient	zar-	old		Crops & fruit	CROPS	GRAIN (GENERIC)	74461	PIE *ǵrh₂-no- 'grain'	Unspecified	No loan
74775	Avestan	Indo-European	50700	Dead (well documented)	Ancient	pitu-	food		Crops & fruit	CROPS	GRAIN (GENERIC)	74753	PIE *peytu-, *pitu- 'food'	Unspecified	No loan
74893	Avestan	Indo-European	50700	Dead (well documented)	Ancient	āδū-frāδana-	abounding in grain		Crops & fruit	CROPS	GRAIN (GENERIC)	74872	PIE *h₂edos- n 'sort of cereal, grain'	Unspecified	No loan
74892	Avestan	Indo-European	50700	Dead (well documented)	Ancient	*āδū-	grain		Crops & fruit	CROPS	GRAIN (GENERIC)	74872	PIE *h₂edos- n 'sort of cereal, grain'	Unspecified	No loan
75022	Avestan	Indo-European	50700	Dead (well documented)	Ancient	dāna-	(generic) grain		Crops & fruit	CROPS	GRAIN (GENERIC)	75021	grain-8	Unspecified	No loan
42794	Avestan	Indo-European	50700	Dead (well documented)	Ancient	spaēta-	white (color); white		Crops & fruit	CROPS	WHEAT	73135	PIE *kuei-t- 'shining, white'	Inherited	No loan
73597	Avestan	Indo-European	50700	Dead (well documented)	Ancient	gantuma-	wheat	m	Crops & fruit	CROPS	WHEAT	73596	wheat-3	Unspecified	No loan
73808	Avestan	Indo-European	50700	Dead (well documented)	Ancient	yava-	barley, corn, grain	m	Crops & fruit	CROPS	BARLEY	73806	PIE *yewo-	Unspecified	No loan
61073	Avestan	Indo-European	50700	Dead (well documented)	Ancient	spaka-	dog-like		Farm animals	DOMESTIC ANIMALS	DOG	60954	PIE *ḱuōn- 'dog'	Inherited	No loan
30040	Avestan	Indo-European	50700	Dead (well documented)	Ancient	span-	dog	m	Farm animals	DOMESTIC ANIMALS	DOG	60954	PIE *ḱuōn- 'dog'	Inherited	No loan
57119	Avestan	Indo-European	50700	Dead (well documented)	Ancient	xara-, xarā-	donkey	m,f	Farm animals	DRAFT ANIMALS	DONKEY	57117	donkey-2	Unspecified	No loan
56198	Avestan	Indo-European	50700	Dead (well documented)	Ancient	aspa-	horse	m	Farm animals	DRAFT ANIMALS	HORSE	56092	PIE *h₁eḱwo- 'horse'	Inherited	No loan
55056	Avestan	Indo-European	50700	Dead (well documented)	Ancient	uxšan-	bull, young bull	m	Farm animals	DRAFT ANIMALS	OX	54932	PIE *Huks-en- 'ox'	Inherited	No loan
55133	Avestan	Indo-European	50700	Dead (well documented)	Ancient	aršan-	man, male	m	Farm animals	DRAFT ANIMALS	OX	55089	PIE *h₂wŕ̥s-en- 'male'	Inherited	No loan
55137	Avestan	Indo-European	50700	Dead (well documented)	Ancient	varšnay-	ram	m	Farm animals	DRAFT ANIMALS	OX	55089	PIE *h₂wŕ̥s-en- 'male'	Unspecified	No loan
55136	Avestan	Indo-European	50700	Dead (well documented)	Ancient	varəšna-	manly	adj	Farm animals	DRAFT ANIMALS	OX	55089	PIE *h₂wŕ̥s-en- 'male'	Unspecified	No loan
69861	Avestan	Indo-European	50700	Dead (well documented)	Ancient	maδu-	wine made of berries	n	Products	DRINK AND DRUGS	MEAD	61738	PIE *médh-u- 'honey, mead'	Unspecified	No loan
66521	Avestan	Indo-European	50700	Dead (well documented)	Ancient	sruuā-	horn, nail	f	Wild animals	GAME ANIMALS	DEER	55066	PIE *ḱerh₂- 'head, horn'	Inherited	No loan
62529	Avestan	Indo-European	50700	Dead (well documented)	Ancient	varāza	boar, wild pig	m	Wild animals	GAME ANIMALS	WILD BOAR	55089	PIE *h₂wŕ̥s-en- 'male'	Inherited	No loan
59593	Avestan	Indo-European	50700	Dead (well documented)	Ancient	varāsa-, parəsa-, ϑβərəsa-	boar, wild pig; piglet	m	Wild animals	GAME ANIMALS	WILD BOAR	59431	PIE *porḱo- 'young pig, piglet'	Unspecified	No loan
86981	Avestan	Indo-European	50700	Dead (well documented)	Ancient	kərət-	to cut	v	Weapons etc.	IMPLEMENTS	KNIFE	76964	PIE *(s)kerH- v 'to cut'	Inherited	No loan
86980	Avestan	Indo-European	50700	Dead (well documented)	Ancient	karəta-, karəti-	knife	m	Weapons etc.	IMPLEMENTS	KNIFE	76964	PIE *(s)kerH- v 'to cut'	Derivation	No loan
77748	Avestan	Indo-European	50700	Dead (well documented)	Ancient	kan-	to dig	v	Cultural artefacts & tools	IMPLEMENTS	SPADE	77746	spade-10	Unspecified	No loan
77747	Avestan	Indo-European	50700	Dead (well documented)	Ancient	kąstra-	spade	n	Cultural artefacts & tools	IMPLEMENTS	SPADE	77746	spade-10	Derivation	No loan
70210	Avestan	Indo-European	50700	Dead (well documented)	Ancient	mā̊ŋhəm-	board		Products	MATERIALS	MEAT	70147	PIE *mēms- 'meat'	Unspecified	No loan
70630	Avestan	Indo-European	50700	Dead (well documented)	Ancient	xrūra-	bloody, cruel	adj	Products	MATERIALS	MEAT	70508	PIE *kreu-, *kreuH-, *krū-, *kreus-, *krus- 'blood, raw flesh'	Inherited	No loan
86216	Avestan	Indo-European	50700	Dead (well documented)	Ancient	čerəman-	leather; animal skin, hide	n	Metals & materials	MATERIALS	LEATHER	86157	PIE *kr-io-, *k(o)r-io- v 'torn off'	Inherited	No loan
70807	Avestan	Indo-European	50700	Dead (well documented)	Ancient	pōiϑβa-	fat		Products	MATERIALS	GREASE	70803	PIE *peiH-	Inherited	No loan
71140	Avestan	Indo-European	50700	Dead (well documented)	Ancient	viiāxti-	adornment, make-up	f	Products	MATERIALS	GREASE	71038	PIE *ongʷ- v 'to anoint'	Unspecified	No loan
71413	Avestan	Indo-European	50700	Dead (well documented)	Ancient	ūϑa-, uϑa-	grease	n	Products	MATERIALS	GREASE	71412	grease-8	Unspecified	No loan
36275	Avestan	Indo-European	50700	Dead (well documented)	Ancient	gairi-	mountain (not hill); mountain		Metals & materials	MATERIALS	STONE	85377	PIE *gʷrH-	Unspecified	No loan
85483	Avestan	Indo-European	50700	Dead (well documented)	Ancient	asman-	stone, rock; sky	m	Metals & materials	MATERIALS	STONE	85442	PIE *h₂eḱ-men- 'stone, rock'	Unspecified	No loan
85186	Avestan	Indo-European	50700	Dead (well documented)	Ancient	dāuru-	wood; tree-trunk; piece of wood, club	n	Metals & materials	MATERIALS	WOOD	85098	PIE *doru-, *derwo- 'wood, tree'	Inherited	No loan
83640	Avestan	Indo-European	50700	Dead (well documented)	Ancient	aiiah-	metal, copper	n	Metals & materials	METALS	COPPER	83575	PIE *h₂éi-es- 'bronze'	Inherited	No loan
84346	Avestan	Indo-European	50700	Dead (well documented)	Ancient	zaranya-	gold	n	Metals & materials	METALS	GOLD	84264	PIE *ǵhlh₃- 'green, yellow'	Inherited	No loan
83969	Avestan	Indo-European	50700	Dead (well documented)	Ancient	ayanghaēna-	made of iron or metal, iron-; iron object	adj,s	Metals & materials	METALS	IRON	83968	iron-5	Unspecified	No loan
83990	Avestan	Indo-European	50700	Dead (well documented)	Ancient	ərəzata-	silver	n	Metals & materials	METALS	SILVER	83970	PIE *h₂erǵ- 'brilliant white'	Inherited	No loan
59259	Avestan	Indo-European	50700	Dead (well documented)	Ancient	hū-	pig; sow		Farm animals	PIG RAISING	PIG	59114	PIE *suH- 'pig'	Inherited	No loan
59593	Avestan	Indo-European	50700	Dead (well documented)	Ancient	varāsa-, parəsa-, ϑβərəsa-	boar, wild pig; piglet	m	Farm animals	PIG RAISING	PIG	59431	PIE *porḱo- 'young pig, piglet'	Unspecified	No loan
60727	Avestan	Indo-European	50700	Dead (well documented)	Ancient	yār-	year	n	Farm animals	POULTRY	CHICKEN	83276	autumn-1	Inherited	No loan
30023	Avestan	Indo-European	50700	Dead (well documented)	Ancient	vi-, vi, vīš	bird		Farm animals	POULTRY	HEN	60054	PIE *h₂eu-i- 'bird'	Inherited	No loan
62233	Avestan	Indo-European	50700	Dead (well documented)	Ancient	arša-	bear		Wild animals	PREDATOR ANIMALS	BEAR	62148	PIE *h₂rtḱo- 'bear'	Inherited	No loan
43763	Avestan	Indo-European	50700	Dead (well documented)	Ancient	raopay-	a Canis species, fox or jackal		Wild animals	PREDATOR ANIMALS	JACKAL	63896	fox-1	Inherited	No loan
64958	Avestan	Indo-European	50700	Dead (well documented)	Ancient	aži-	snake, dragon	m	Wild animals	PREDATOR ANIMALS	SNAKE	64881	PIE *angʷ(h)i- 'snake'	Inherited	No loan
61991	Avestan	Indo-European	50700	Dead (well documented)	Ancient	vəhrka-, vəhrkā-	wolf	m,f	Wild animals	PREDATOR ANIMALS	WOLF	61774	PIE *ulkʷo- 'wolf'	Unspecified	No loan
63890	Avestan	Indo-European	50700	Dead (well documented)	Ancient	pusā-	tuft of hair		Wild animals	PREDATOR ANIMALS	FOX	63795	PIE *puk-so- 'thick-haired'	Inherited	No loan
63909	Avestan	Indo-European	50700	Dead (well documented)	Ancient	urupi-	a Canis species; fox; dog; marten	m	Wild animals	PREDATOR ANIMALS	FOX	63896	fox-1	Inherited	No loan
43763	Avestan	Indo-European	50700	Dead (well documented)	Ancient	raopay-	a Canis species, fox or jackal		Wild animals	PREDATOR ANIMALS	FOX	63896	fox-1	Inherited	No loan
66250	Avestan	Indo-European	50700	Dead (well documented)	Ancient	vaii-	bird	m	Wild animals	PREDATOR BIRDS	EAGLE	60054	PIE *h₂eu-i- 'bird'	Inherited	No loan
66179	Avestan	Indo-European	50700	Dead (well documented)	Ancient	ərəzifiia-	eagle	m	Wild animals	PREDATOR BIRDS	EAGLE	66173	PIE *h₂rǵipió- 'eagle'	Unspecified	No loan
69091	Avestan	Indo-European	50700	Dead (well documented)	Ancient	paiiah-	milk		Products	PRODUCTS	MILK	69078	PIE *piH-	Inherited	No loan
55780	Avestan	Indo-European	50700	Dead (well documented)	Ancient	pasu-	cattle; domestic animal, sheep	m	Products	PRODUCTS	WOOL	55696	PIE *peḱ-u- 'cattle'	Inherited	No loan
43838	Avestan	Indo-European	50700	Dead (well documented)	Ancient	varənā-	wool (of an animal); clothing of wool	f	Products	PRODUCTS	WOOL	67489	PIE *h₂ulh₁- 'wool'	Inherited	No loan
67896	Avestan	Indo-European	50700	Dead (well documented)	Ancient	pašna-	eyelash	n	Products	PRODUCTS	WOOL	67867	wool-2	Unspecified	No loan
83395	Avestan	Indo-European	50700	Dead (well documented)	Ancient	sarəd-	year	f	Seasons	SEASONS	AUTUMN	83391	autumn-7	Unspecified	No loan
82170	Avestan	Indo-European	50700	Dead (well documented)	Ancient	vaŋhar-	spring	n	Seasons	SEASONS	SPRING	82163	PIE *ues-r-, *ues-n- 'spring'	Unspecified	No loan
82495	Avestan	Indo-European	50700	Dead (well documented)	Ancient	aspərəzatā	to strive after	v	Seasons	SEASONS	SPRING	82409	PIE *spré-n-gh-e-	Inherited	No loan
60727	Avestan	Indo-European	50700	Dead (well documented)	Ancient	yār-	year	n	Seasons	SEASONS	SPRING	83276	autumn-1	Inherited	No loan
59060	Avestan	Indo-European	50700	Dead (well documented)	Ancient	ham-	summer	m	Seasons	SEASONS	SUMMER	59054	PIE *s(e)m-eh₂-, *sm̥-h₂-ó- 'year'	Inherited	No loan
42788	Avestan	Indo-European	50700	Dead (well documented)	Ancient	garəma-	warm (of weather); heat		Seasons	SEASONS	SUMMER	82836	PIE *gʷher-o- 'warmth'	Inherited	No loan
82016	Avestan	Indo-European	50700	Dead (well documented)	Ancient	ziiā̊-	winter (young Avestan)		Seasons	SEASONS	WINTER	81897	PIE *ǵh(e)i-m- 'winter'	Inherited	No loan
82019	Avestan	Indo-European	50700	Dead (well documented)	Ancient	zimō-	winter (Old Avestan)	f	Seasons	SEASONS	WINTER	81897	PIE *ǵh(e)i-m- 'winter'	Inherited	No loan
58552	Avestan	Indo-European	50700	Dead (well documented)	Ancient	aza-	goat, he-goat	m	Farm animals	SMALL CATTLE	GOAT	58531	goat-2	Unspecified	No loan
58657	Avestan	Indo-European	50700	Dead (well documented)	Ancient	būza-	he-goat	m	Farm animals	SMALL CATTLE	GOAT	58558	PIE *bhuǵo- 'goat, buck'	Inherited	No loan
55133	Avestan	Indo-European	50700	Dead (well documented)	Ancient	aršan-	man, male	m	Farm animals	SMALL CATTLE	RAM	55089	PIE *h₂wŕ̥s-en- 'male'	Inherited	No loan
55136	Avestan	Indo-European	50700	Dead (well documented)	Ancient	varəšna-	manly	adj	Farm animals	SMALL CATTLE	RAM	55089	PIE *h₂wŕ̥s-en- 'male'	Unspecified	No loan
55137	Avestan	Indo-European	50700	Dead (well documented)	Ancient	varšnay-	ram	m	Farm animals	SMALL CATTLE	RAM	55089	PIE *h₂wŕ̥s-en- 'male'	Unspecified	No loan
59060	Avestan	Indo-European	50700	Dead (well documented)	Ancient	ham-	summer	m	Farm animals	SMALL CATTLE	KID	59054	PIE *s(e)m-eh₂-, *sm̥-h₂-ó- 'year'	Inherited	No loan
81546	Avestan	Indo-European	50700	Dead (well documented)	Ancient	uruuarā-	plant, flora	f	Cultural artefacts & tools	TILLAGE	CULTIVATED FIELD	72491	PIE *h₂erh₃- v 'to plow'	Inherited	No loan
81244	Avestan	Indo-European	50700	Dead (well documented)	Ancient	ząm pərəϑβīm	broad earth		Cultural artefacts & tools	TILLAGE	CULTIVATED FIELD	81169	PIE *pelth₂- 'flat'	Inherited	No loan
81451	Avestan	Indo-European	50700	Dead (well documented)	Ancient	rauuah-	space, room		Cultural artefacts & tools	TILLAGE	CULTIVATED FIELD	81437	PIE *(H)rewHos- 'open space'	Unspecified	No loan
88260	Avestan	Indo-European	50700	Dead (well documented)	Ancient	išav-	arrow		Weapons etc.	WEAPONS	ARROW	88257	PIE *(H)isu- 'arrow'	Inherited	No loan
88274	Avestan	Indo-European	50700	Dead (well documented)	Ancient	aštay-	arrow	m	Weapons etc.	WEAPONS	ARROW	88273	arrow-6	Unspecified	No loan
78895	Avestan	Indo-European	50700	Dead (well documented)	Ancient	taša-	adze	m	Cultural artefacts & tools	WEAPONS	AXE	71546	PIE *teḱ-s- v 'to hew, to fabricate'	Unspecified	No loan
87847	Avestan	Indo-European	50700	Dead (well documented)	Ancient	jiiā-	bowstring		Weapons etc.	WEAPONS	BOW	87844	PIE *gʷieh₂- 'string'	Inherited	No loan
87860	Avestan	Indo-European	50700	Dead (well documented)	Ancient	ϑanuuarə-, ϑanuuan-	bow		Weapons etc.	WEAPONS	BOW	87859	bow-4	Unspecified	No loan
85186	Avestan	Indo-European	50700	Dead (well documented)	Ancient	dāuru-	wood; tree-trunk; piece of wood, club	n	Weapons etc.	WEAPONS	SPEAR	85098	PIE *doru-, *derwo- 'wood, tree'	Inherited	No loan
87484	Avestan	Indo-European	50700	Dead (well documented)	Ancient	aršti-	spear		Weapons etc.	WEAPONS	SPEAR	87483	spear-3	Unspecified	No loan
75677	Avestan	Indo-European	50700	Dead (well documented)	Ancient	razura-	forest, thicket		Crops & fruit	VEGETABLES & FRUIT	GRAPE	75676	grape-2	Unspecified	No loan
80582	Avestan	Indo-European	50700	Dead (well documented)	Ancient	aša-	armpit; shoulder		Cultural artefacts & tools	VEHICLES	AXLE	80380	PIE *h₂eḱs-(i-) 'axle, arm-pit'	Inherited	No loan
80336	Avestan	Indo-European	50700	Dead (well documented)	Ancient	nāfa-	navel, origin, blood relationship	m	Cultural artefacts & tools	VEHICLES	HUB	80325	wheel-1	Inherited	No loan
79790	Avestan	Indo-European	50700	Dead (well documented)	Ancient	vāza-	pulling (noun); draught animal	m	Cultural artefacts & tools	VEHICLES	WAGON	79631	PIE *uoǵh- v 'to carry, convey, drive'	Inherited	No loan
79788	Avestan	Indo-European	50700	Dead (well documented)	Ancient	vāša-	carriage, vehicle, wagon, chariot	m	Cultural artefacts & tools	VEHICLES	WAGON	79631	PIE *uoǵh- v 'to carry, convey, drive'	Inherited	No loan
80106	Avestan	Indo-European	50700	Dead (well documented)	Ancient	čaxra-	wheel	m,n	Cultural artefacts & tools	VEHICLES	WHEEL	79981	PIE *kʷel(H)- v 'to turn, to go around'	Inherited	No loan
80321	Avestan	Indo-European	50700	Dead (well documented)	Ancient	raϑa-	chariot	m	Cultural artefacts & tools	VEHICLES	WHEEL	80116	PIE *(H)reth₂- v 'to run'	Inherited	No loan
80336	Avestan	Indo-European	50700	Dead (well documented)	Ancient	nāfa-	navel, origin, blood relationship	m	Cultural artefacts & tools	VEHICLES	WHEEL	80325	wheel-1	Inherited	No loan
79488	Avestan	Indo-European	50700	Dead (well documented)	Ancient	yuǰ-	to join	v	Cultural artefacts & tools	VEHICLES	YOKE	79367	PIE *yug-o- 'yoke'	Unspecified	No loan
89017	Azerbaijani	Turkic	68483	Modern language	Modern	alma	apple		Crops & fruit	VEGETABLES & FRUIT	APPLE	94040	apple-1	Unspecified	No loan
89411	Crimean Tatar	Turkic	68477	Modern language	Modern	alma	apple		Crops & fruit	VEGETABLES & FRUIT	APPLE	94040	apple-1	Unspecified	No loan
89313	Gagauz	Turkic	68476	Modern language	Modern	alma	apple		Crops & fruit	VEGETABLES & FRUIT	APPLE	94040	apple-1	Unspecified	No loan
89518	Kazakh	Turkic	67780	Modern language	Modern	alma	apple		Crops & fruit	VEGETABLES & FRUIT	APPLE	94040	apple-1	Unspecified	No loan
89824	Kumyk	Turkic	68478	Modern language	Modern	alma	apple		Crops & fruit	VEGETABLES & FRUIT	APPLE	94040	apple-1	Unspecified	No loan
89712	Southern Altai	Turkic	68489	Modern language	Modern	alama	apple		Crops & fruit	VEGETABLES & FRUIT	APPLE	94040	apple-1	Unspecified	No loan
89120	Turkish	Turkic	67760	Modern language	Modern	elma	apple		Crops & fruit	VEGETABLES & FRUIT	APPLE	94040	apple-1	Unspecified	No loan
89221	Turkmen	Turkic	67750	Modern language	Modern	alma	apple		Crops & fruit	VEGETABLES & FRUIT	APPLE	94040	apple-1	Unspecified	No loan
89618	Tuvan	Turkic	68484	Modern language	Modern	jabloko	apple		Crops & fruit	VEGETABLES & FRUIT	APPLE	75287	PIE *h₂eb-ōl- 'apple'	Probably borrowed	Loan	Russian
89368	Gagauz	Turkic	68476	Modern language	Modern	asker	army		Weapons etc.	WEAPONS	ARMY	94259	army-1		No loan
89573	Kazakh	Turkic	67780	Modern language	Modern	a'sker	army		Weapons etc.	WEAPONS	ARMY	94259	army-1		No loan
89890	Kumyk	Turkic	68478	Modern language	Modern	asger	army		Weapons etc.	WEAPONS	ARMY	94259	army-1		No loan
89773	Southern Altai	Turkic	68489	Modern language	Modern	čerü	army		Weapons etc.	WEAPONS	ARMY				No loan
89271	Turkmen	Turkic	67750	Modern language	Modern	goşun	army		Weapons etc.	WEAPONS	ARMY				No loan
89674	Tuvan	Turkic	68484	Modern language	Modern	šerig	army		Weapons etc.	WEAPONS	ARMY				No loan
89077	Azerbaijani	Turkic	68483	Modern language	Modern	ordu	army		Weapons etc.	WEAPONS	ARMY	94263	PT *or- 'place; palace; lair, den; middle; place of staying (of the army, ruler, etc.); army'	Inherited	No loan
89475	Crimean Tatar	Turkic	68477	Modern language	Modern	ordu	army		Weapons etc.	WEAPONS	ARMY	94263	PT *or- 'place; palace; lair, den; middle; place of staying (of the army, ruler, etc.); army'	Inherited	No loan
89180	Turkish	Turkic	67760	Modern language	Modern	ordu	army		Weapons etc.	WEAPONS	ARMY	94263	PT *or- 'place; palace; lair, den; middle; place of staying (of the army, ruler, etc.); army'	Inherited	No loan
89574	Kazakh	Turkic	67780	Modern language	Modern	jebe	arrow		Weapons etc.	WEAPONS	ARROW				No loan
89078	Azerbaijani	Turkic	68483	Modern language	Modern	ox	arrow		Weapons etc.	WEAPONS	ARROW	94264	PT *ok 'arrow'		No loan
89476	Crimean Tatar	Turkic	68477	Modern language	Modern	oq	arrow		Weapons etc.	WEAPONS	ARROW	94264	PT *ok 'arrow'		No loan
89369	Gagauz	Turkic	68476	Modern language	Modern	ok	arrow		Weapons etc.	WEAPONS	ARROW	94264	PT *ok 'arrow'		No loan
89891	Kumyk	Turkic	68478	Modern language	Modern	oq	arrow		Weapons etc.	WEAPONS	ARROW	94264	PT *ok 'arrow'		No loan
89775	Southern Altai	Turkic	68489	Modern language	Modern	ok	arrow		Weapons etc.	WEAPONS	ARROW	94264	PT *ok 'arrow'		No loan
89181	Turkish	Turkic	67760	Modern language	Modern	ok	arrow		Weapons etc.	WEAPONS	ARROW	94264	PT *ok 'arrow'		No loan
89272	Turkmen	Turkic	67750	Modern language	Modern	ok	arrow		Weapons etc.	WEAPONS	ARROW	94264	PT *ok 'arrow'		No loan
89774	Southern Altai	Turkic	68489	Modern language	Modern	sogon	arrow		Weapons etc.	WEAPONS	ARROW	94265	PT *sAg(u)n 'arrow, arrowhead'		No loan
89675	Tuvan	Turkic	68484	Modern language	Modern	sogun	arrow		Weapons etc.	WEAPONS	ARROW	94265	PT *sAg(u)n 'arrow, arrowhead'		No loan
89072	Azerbaijani	Turkic	68483	Modern language	Modern	payız	autumn / harvest		Seasons	SEASONS	AUTUMN				No loan
89174	Turkish	Turkic	67760	Modern language	Modern	sonbahar	autumn / harvest		Seasons	SEASONS	AUTUMN	82163	PIE. *ues-r-, *ues-n- 'spring'		Loan	Persian
89471	Crimean Tatar	Turkic	68477	Modern language	Modern	küz	autumn / harvest		Seasons	SEASONS	AUTUMN	94267	PT *gǖŕ 'autumn'		No loan
89364	Gagauz	Turkic	68476	Modern language	Modern	güz	autumn / harvest		Seasons	SEASONS	AUTUMN	94267	PT *gǖŕ 'autumn'		No loan
89569	Kazakh	Turkic	67780	Modern language	Modern	ku'z	autumn / harvest		Seasons	SEASONS	AUTUMN	94267	PT *gǖŕ 'autumn'		No loan
89886	Kumyk	Turkic	68478	Modern language	Modern	gjuz	autumn / harvest		Seasons	SEASONS	AUTUMN	94267	PT *gǖŕ 'autumn'		No loan
89769	Southern Altai	Turkic	68489	Modern language	Modern	küs	autumn / harvest		Seasons	SEASONS	AUTUMN	94267	PT *gǖŕ 'autumn'		No loan
89175	Turkish	Turkic	67760	Modern language	Modern	güz	autumn / harvest		Seasons	SEASONS	AUTUMN	94267	PT *gǖŕ 'autumn'		No loan
89267	Turkmen	Turkic	67750	Modern language	Modern	güýz	autumn / harvest		Seasons	SEASONS	AUTUMN	94267	PT *gǖŕ 'autumn'		No loan
89670	Tuvan	Turkic	68484	Modern language	Modern	küs	autumn / harvest		Seasons	SEASONS	AUTUMN	94267	PT *gǖŕ 'autumn'		No loan
89298	Gagauz	Turkic	68476	Modern language	Modern	nacak	axe		Cultural artefacts & tools	WEAPONS	AXE				No loan
89606	Tuvan	Turkic	68484	Modern language	Modern	daldə	axe		Cultural artefacts & tools	WEAPONS	AXE			Unspecified	No loan
89000	Azerbaijani	Turkic	68483	Modern language	Modern	balta	axe		Cultural artefacts & tools	WEAPONS	AXE	94026	PT *baltu 'axe'	Unspecified	No loan
89396	Crimean Tatar	Turkic	68477	Modern language	Modern	balta	axe		Cultural artefacts & tools	WEAPONS	AXE	94026	PT *baltu 'axe'	Unspecified	No loan
89299	Gagauz	Turkic	68476	Modern language	Modern	balta	axe		Cultural artefacts & tools	WEAPONS	AXE	94026	PT *baltu 'axe'	Unspecified	No loan
89507	Kazakh	Turkic	67780	Modern language	Modern	balta	axe		Cultural artefacts & tools	WEAPONS	AXE	94026	PT *baltu 'axe'	Unspecified	No loan
89806	Kumyk	Turkic	68478	Modern language	Modern	balta	axe		Cultural artefacts & tools	WEAPONS	AXE	94026	PT *baltu 'axe'	Unspecified	No loan
89106	Turkish	Turkic	67760	Modern language	Modern	balta	axe		Cultural artefacts & tools	WEAPONS	AXE	94026	PT *baltu 'axe'	Unspecified	No loan
89208	Turkmen	Turkic	67750	Modern language	Modern	palta	axe		Cultural artefacts & tools	WEAPONS	AXE	94026	PT *baltu 'axe'	Unspecified	No loan
89776	Southern Altai	Turkic	68489	Modern language	Modern	malta	axe; battle axe		Cultural artefacts & tools	WEAPONS	AXE	94026	PT *baltu 'axe'	Unspecified	No loan
89018	Azerbaijani	Turkic	68483	Modern language	Modern	arpa	barley		Crops & fruit	CROPS	BARLEY	94043	PT *arpa 'barley	Unspecified	No loan
89412	Crimean Tatar	Turkic	68477	Modern language	Modern	arpa	barley		Crops & fruit	CROPS	BARLEY	94043	PT *arpa 'barley	Unspecified	No loan
89314	Gagauz	Turkic	68476	Modern language	Modern	arpa	barley		Crops & fruit	CROPS	BARLEY	94043	PT *arpa 'barley	Unspecified	No loan
89519	Kazakh	Turkic	67780	Modern language	Modern	arpa	barley		Crops & fruit	CROPS	BARLEY	94043	PT *arpa 'barley	Unspecified	No loan
89825	Kumyk	Turkic	68478	Modern language	Modern	arpa	barley		Crops & fruit	CROPS	BARLEY	94043	PT *arpa 'barley	Unspecified	No loan
89713	Southern Altai	Turkic	68489	Modern language	Modern	arba	barley		Crops & fruit	CROPS	BARLEY	94043	PT *arpa 'barley	Unspecified	No loan
89121	Turkish	Turkic	67760	Modern language	Modern	arpa	barley		Crops & fruit	CROPS	BARLEY	94043	PT *arpa 'barley	Unspecified	No loan
89222	Turkmen	Turkic	67750	Modern language	Modern	arpa	barley		Crops & fruit	CROPS	BARLEY	94043	PT *arpa 'barley	Unspecified	No loan
89619	Tuvan	Turkic	68484	Modern language	Modern	arbaj	barley		Crops & fruit	CROPS	BARLEY	94043	PT *arpa 'barley	Unspecified	No loan
89085	Azerbaijani	Turkic	68483	Modern language	Modern	ayı	bear		Wild animals	PREDATOR ANIMALS	BEAR	94268	bear-1		No loan
89484	Crimean Tatar	Turkic	68477	Modern language	Modern	ayuv	bear		Wild animals	PREDATOR ANIMALS	BEAR	94268	bear-1		No loan
89376	Gagauz	Turkic	68476	Modern language	Modern	ayı	bear		Wild animals	PREDATOR ANIMALS	BEAR	94268	bear-1		No loan
89581	Kazakh	Turkic	67780	Modern language	Modern	ai'u'?	bear		Wild animals	PREDATOR ANIMALS	BEAR	94268	bear-1		No loan
89899	Kumyk	Turkic	68478	Modern language	Modern	ajuv	bear		Wild animals	PREDATOR ANIMALS	BEAR	94268	bear-1		No loan
89784	Southern Altai	Turkic	68489	Modern language	Modern	aju	bear		Wild animals	PREDATOR ANIMALS	BEAR	94268	bear-1		No loan
89188	Turkish	Turkic	67760	Modern language	Modern	ayı	bear		Wild animals	PREDATOR ANIMALS	BEAR	94268	bear-1		No loan
89279	Turkmen	Turkic	67750	Modern language	Modern	aýy	bear		Wild animals	PREDATOR ANIMALS	BEAR	94268	bear-1		No loan
89682	Tuvan	Turkic	68484	Modern language	Modern	adəg	bear		Wild animals	PREDATOR ANIMALS	BEAR	94268	bear-1		No loan
89323	Gagauz	Turkic	68476	Modern language	Modern	kuvan	bee		Farm animals	DOMESTIC INSECTS	BEE				No loan
89721	Southern Altai	Turkic	68489	Modern language	Modern	adaru	bee		Farm animals	DOMESTIC INSECTS	BEE	94269	PT *ārɨ 'wasp, bee'		No loan
89028	Azerbaijani	Turkic	68483	Modern language	Modern	bal arısı	bee		Farm animals	DOMESTIC INSECTS	BEE	94269	PT *ārɨ 'wasp, bee'		No loan
89424	Crimean Tatar	Turkic	68477	Modern language	Modern	balqurt	bee		Farm animals	DOMESTIC INSECTS	BEE	94270	PT *bạl 'honey'		No loan
89834	Kumyk	Turkic	68478	Modern language	Modern	balžibin	bee		Farm animals	DOMESTIC INSECTS	BEE	94270	PT *bạl 'honey'		No loan
89130	Turkish	Turkic	67760	Modern language	Modern	bal arısı	bee		Farm animals	DOMESTIC INSECTS	BEE	94269	PT *ārɨ 'wasp, bee'		No loan
89230	Turkmen	Turkic	67750	Modern language	Modern	bal arysy	bee		Farm animals	DOMESTIC INSECTS	BEE	94269	PT *ārɨ 'wasp, bee'		No loan
89324	Gagauz	Turkic	68476	Modern language	Modern	arı	bee		Farm animals	DOMESTIC INSECTS	BEE	94269	PT *ārɨ 'wasp, bee'		No loan
89527	Kazakh	Turkic	67780	Modern language	Modern	ara	bee		Farm animals	DOMESTIC INSECTS	BEE	94269	PT *ārɨ 'wasp, bee'		No loan
89627	Tuvan	Turkic	68484	Modern language	Modern	arə	bee		Farm animals	DOMESTIC INSECTS	BEE	94269	PT *ārɨ 'wasp, bee'		No loan
89485	Crimean Tatar	Turkic	68477	Modern language	Modern	kiyik ögüz	bison		Wild animals	GAME ANIMALS	BISON	94117	PT *öküŕ 'ox'		No loan
89377	Gagauz	Turkic	68476	Modern language	Modern	yaban öküzü	bison		Wild animals	GAME ANIMALS	BISON	94117	PT *öküŕ 'ox'		No loan
89189	Turkish	Turkic	67760	Modern language	Modern	yaban öküzü	bison		Wild animals	GAME ANIMALS	BISON	94117	PT *öküŕ 'ox'		No loan
89086	Azerbaijani	Turkic	68483	Modern language	Modern	bizon	bison		Wild animals	GAME ANIMALS	BISON	64199	bison-4		Loan	?
89280	Turkmen	Turkic	67750	Modern language	Modern	bizon	bison		Wild animals	GAME ANIMALS	BISON	64199	bison-4		Loan	?
89683	Tuvan	Turkic	68484	Modern language	Modern	bizon	bison		Wild animals	GAME ANIMALS	BISON	64199	bison-4		Loan	?
89785	Southern Altai	Turkic	68489	Modern language	Modern	bizon	bison		Wild animals	GAME ANIMALS	BISON	64199	bison-4		Loan	?
89582	Kazakh	Turkic	67780	Modern language	Modern	o'g'yz	bison		Wild animals	GAME ANIMALS	BISON	94117	PT *öküŕ 'ox'		No loan
89893	Kumyk	Turkic	68478	Modern language	Modern	qazarhu	bow		Weapons etc.	WEAPONS	BOW				No loan
89778	Southern Altai	Turkic	68489	Modern language	Modern	ok-jaa	bow		Weapons etc.	WEAPONS	BOW	94266	PT *jā(j) 'bow'		No loan
89576	Kazakh	Turkic	67780	Modern language	Modern	sadaq	bow		Weapons etc.	WEAPONS	BOW				Loan	Mongolian
89777	Southern Altai	Turkic	68489	Modern language	Modern	saadak	bow		Weapons etc.	WEAPONS	BOW				Loan	Mongolian
89080	Azerbaijani	Turkic	68483	Modern language	Modern	yay	bow		Weapons etc.	WEAPONS	BOW	94266	PT *jā(j) 'bow'		No loan
89479	Crimean Tatar	Turkic	68477	Modern language	Modern	yay	bow		Weapons etc.	WEAPONS	BOW	94266	PT *jā(j) 'bow'		No loan
89371	Gagauz	Turkic	68476	Modern language	Modern	yay	bow		Weapons etc.	WEAPONS	BOW	94266	PT *jā(j) 'bow'		No loan
89894	Kumyk	Turkic	68478	Modern language	Modern	žaja	bow		Weapons etc.	WEAPONS	BOW	94266	PT *jā(j) 'bow'		No loan
89183	Turkish	Turkic	67760	Modern language	Modern	yay	bow		Weapons etc.	WEAPONS	BOW	94266	PT *jā(j) 'bow'		No loan
89274	Turkmen	Turkic	67750	Modern language	Modern	ýaý	bow		Weapons etc.	WEAPONS	BOW	94266	PT *jā(j) 'bow'		No loan
89677	Tuvan	Turkic	68484	Modern language	Modern	soguna	bow		Weapons etc.	WEAPONS	BOW	94265	PT *sAg(u)n 'arrow, arrowhead'		No loan
89426	Crimean Tatar	Turkic	68477	Modern language	Modern	tana	bull		Farm animals	CATTLE	BULL	94271	cattle-1		No loan
89835	Kumyk	Turkic	68478	Modern language	Modern	tana	bull		Farm animals	CATTLE	BULL	94271	cattle-1		No loan
89029	Azerbaijani	Turkic	68483	Modern language	Modern	buğa	bull		Farm animals	CATTLE	BULL	94086	PT *būka 'bull'	Unspecified	No loan
89425	Crimean Tatar	Turkic	68477	Modern language	Modern	buğa	bull		Farm animals	CATTLE	BULL	94086	PT *būka 'bull'	Unspecified	No loan
89325	Gagauz	Turkic	68476	Modern language	Modern	bua, buga	bull		Farm animals	CATTLE	BULL	94086	PT *būka 'bull'	Unspecified	No loan
89528	Kazakh	Turkic	67780	Modern language	Modern	buqa	bull		Farm animals	CATTLE	BULL	94086	PT *būka 'bull'	Unspecified	No loan
89836	Kumyk	Turkic	68478	Modern language	Modern	buɣa	bull		Farm animals	CATTLE	BULL	94086	PT *būka 'bull'	Unspecified	No loan
89722	Southern Altai	Turkic	68489	Modern language	Modern	buka	bull		Farm animals	CATTLE	BULL	94086	PT *būka 'bull'	Unspecified	No loan
89131	Turkish	Turkic	67760	Modern language	Modern	boğa	bull		Farm animals	CATTLE	BULL	94086	PT *būka 'bull'	Unspecified	No loan
49	Basque (West)	Basque	33500	Modern language	Modern	goldatu	plow		Activities	ACTIVITIES	TO PLOW				No loan
48	Basque (West)	Basque	33500	Modern language	Modern	josi	sew		Activities	ACTIVITIES	TO SEW				No loan
50	Basque (West)	Basque	33500	Modern language	Modern	erein	sow		Activities	ACTIVITIES	TO SOW				No loan
47	Basque (West)	Basque	33500	Modern language	Modern	irun; ardazkatu	spin (thread)		Activities	ACTIVITIES	TO SPIN (THREAD)				No loan
46	Basque (West)	Basque	33500	Modern language	Modern	bilbatu	weave		Activities	ACTIVITIES	TO WEAVE				No loan
1	Basque (West)	Basque	33500	Modern language	Modern	zezen	bull		Farm animals	CATTLE	BULL				No loan
4	Basque (West)	Basque	33500	Modern language	Modern	abere	cattle (collective term)		Farm animals	CATTLE	CATTLE				Loan	Latin
2	Basque (West)	Basque	33500	Modern language	Modern	behi	cow		Farm animals	CATTLE	COW				No loan
61	Basque (West)	Basque	33500	Modern language	Modern	liho	flax		Crops & fruit	CROPS	FLAX	76222			Loan	Latin
56	Basque (West)	Basque	33500	Modern language	Modern	ale	grain (generic)		Crops & fruit	CROPS	GRAIN (GENERIC)				No loan
54	Basque (West)	Basque	33500	Modern language	Modern	olo	oats		Crops & fruit	CROPS	OATS				No loan
53	Basque (West)	Basque	33500	Modern language	Modern	zekale	rye		Crops & fruit	CROPS	RYE				Loan	Latin
51	Basque (West)	Basque	33500	Modern language	Modern	gari	wheat		Crops & fruit	CROPS	WHEAT				No loan
52	Basque (West)	Basque	33500	Modern language	Modern	garagar	barley		Crops & fruit	CROPS	BARLEY				No loan
18	Basque (West)	Basque	33500	Modern language	Modern	katu	cat		Farm animals	DOMESTIC ANIMALS	CAT				No loan
17	Basque (West)	Basque	33500	Modern language	Modern	zakur	dog		Farm animals	DOMESTIC ANIMALS	DOG				No loan
19	Basque (West)	Basque	33500	Modern language	Modern	erle	bee		Farm animals	DOMESTIC INSECTS	BEE				No loan
6	Basque (West)	Basque	33500	Modern language	Modern	asto	donkey		Farm animals	DRAFT ANIMALS	DONKEY				No loan
5	Basque (West)	Basque	33500	Modern language	Modern	zaldi	horse		Farm animals	DRAFT ANIMALS	HORSE				No loan
3	Basque (West)	Basque	33500	Modern language	Modern	idi	ox		Farm animals	DRAFT ANIMALS	OX				No loan
41	Basque (West)	Basque	33500	Modern language	Modern	ezti-ur	mead		Products	DRINK AND DRUGS	MEAD				No loan
40	Basque (West)	Basque	33500	Modern language	Modern	ardo	wine		Products	DRINK AND DRUGS	WINE				No loan
28	Basque (West)	Basque	33500	Modern language	Modern	bisonte	bison		Wild animals	GAME ANIMALS	BISON				Loan	Spanish
34	Basque (West)	Basque	33500	Modern language	Modern	orein	deer		Wild animals	GAME ANIMALS	DEER				No loan
29	Basque (West)	Basque	33500	Modern language	Modern	erbi	hare		Wild animals	GAME ANIMALS	HARE				No loan
30	Basque (West)	Basque	33500	Modern language	Modern	untxi	rabbit		Wild animals	GAME ANIMALS	RABBIT				No loan
23	Basque (West)	Basque	33500	Modern language	Modern	basurde	wild pig		Wild animals	GAME ANIMALS	WILD BOAR				No loan
94	Basque (West)	Basque	33500	Modern language	Modern	labana; aizto	knife		Weapons etc.	IMPLEMENTS	KNIFE				No loan
66	Basque (West)	Basque	33500	Modern language	Modern	zerra	saw		Cultural artefacts & tools	IMPLEMENTS	SAW				Loan	Spanish
62	Basque (West)	Basque	33500	Modern language	Modern	sega	scythe		Cultural artefacts & tools	IMPLEMENTS	SCYTHE				No loan
63	Basque (West)	Basque	33500	Modern language	Modern	igitai	sickle		Cultural artefacts & tools	IMPLEMENTS	SICKLE				No loan
64	Basque (West)	Basque	33500	Modern language	Modern	pala	spade		Cultural artefacts & tools	IMPLEMENTS	SPADE				Loan	Spanish
44	Basque (West)	Basque	33500	Modern language	Modern	haragi	meat		Products	MATERIALS	MEAT				No loan
89	Basque (West)	Basque	33500	Modern language	Modern	larru	leather		Metals & materials	MATERIALS	LEATHER				No loan
36	Basque (West)	Basque	33500	Modern language	Modern	larru	fur		Products	MATERIALS	FUR				No loan
45	Basque (West)	Basque	33500	Modern language	Modern	koipe	grease		Products	MATERIALS	GREASE				No loan
88	Basque (West)	Basque	33500	Modern language	Modern	harri	stone		Metals & materials	MATERIALS	STONE				No loan
87	Basque (West)	Basque	33500	Modern language	Modern	egur, zur	wood		Metals & materials	MATERIALS	WOOD				No loan
83	Basque (West)	Basque	33500	Modern language	Modern	kobre, burdingorri	copper		Metals & materials	METALS	COPPER				No loan
86	Basque (West)	Basque	33500	Modern language	Modern	urre	gold		Metals & materials	METALS	GOLD				Loan	Latin
84	Basque (West)	Basque	33500	Modern language	Modern	burdina	iron		Metals & materials	METALS	IRON				No loan
85	Basque (West)	Basque	33500	Modern language	Modern	zilar	silver		Metals & materials	METALS	SILVER				No loan
11	Basque (West)	Basque	33500	Modern language	Modern	zerri	pig		Farm animals	PIG RAISING	PIG				No loan
12	Basque (West)	Basque	33500	Modern language	Modern	txerrikume	piglet		Farm animals	PIG RAISING	PIGLET				No loan
15	Basque (West)	Basque	33500	Modern language	Modern	oilasko	chicken		Farm animals	POULTRY	CHICKEN				No loan
16	Basque (West)	Basque	33500	Modern language	Modern	ahate	duck		Farm animals	POULTRY	DUCK				No loan
13	Basque (West)	Basque	33500	Modern language	Modern	oilo	hen		Farm animals	POULTRY	HEN				No loan
14	Basque (West)	Basque	33500	Modern language	Modern	oilar	rooster		Farm animals	POULTRY	ROOSTER				No loan
22	Basque (West)	Basque	33500	Modern language	Modern	hartz	bear		Wild animals	PREDATOR ANIMALS	BEAR				No loan
27	Basque (West)	Basque	33500	Modern language	Modern	txakal	jackal		Wild animals	PREDATOR ANIMALS	JACKAL				Loan	Spanish
24	Basque (West)	Basque	33500	Modern language	Modern	lehoinabar	leopard		Wild animals	PREDATOR ANIMALS	LEOPARD				No loan
25	Basque (West)	Basque	33500	Modern language	Modern	lehoi	lion		Wild animals	PREDATOR ANIMALS	LION				Loan	Latin
31	Basque (West)	Basque	33500	Modern language	Modern	suge	snake		Wild animals	PREDATOR ANIMALS	SNAKE				No loan
21	Basque (West)	Basque	33500	Modern language	Modern	otso	wolf		Wild animals	PREDATOR ANIMALS	WOLF				No loan
26	Basque (West)	Basque	33500	Modern language	Modern	azeri	fox		Wild animals	PREDATOR ANIMALS	FOX				No loan
64059	Basque (West)	Basque	33500	Modern language	Modern	azaria	fox		Wild animals	PREDATOR ANIMALS	FOX	64057		Unspecified	No loan
33	Basque (West)	Basque	33500	Modern language	Modern	arrano	eagle		Wild animals	PREDATOR BIRDS	EAGLE				No loan
32	Basque (West)	Basque	33500	Modern language	Modern	erroi	raven		Wild animals	PREDATOR BIRDS	RAVEN				No loan
37	Basque (West)	Basque	33500	Modern language	Modern	ezti	honey		Products	PRODUCTS	HONEY				No loan
42	Basque (West)	Basque	33500	Modern language	Modern	lupulu	hops		Products	PRODUCTS	HOPS				Loan	Spanish
38	Basque (West)	Basque	33500	Modern language	Modern	esne	milk		Products	PRODUCTS	MILK				No loan
39	Basque (West)	Basque	33500	Modern language	Modern	gatz	salt		Products	PRODUCTS	SALT				No loan
43	Basque (West)	Basque	33500	Modern language	Modern	ezko	beeswax		Products	PRODUCTS	WAX (BEES)				No loan
35	Basque (West)	Basque	33500	Modern language	Modern	artile	wool		Products	PRODUCTS	WOOL				No loan
79	Basque (West)	Basque	33500	Modern language	Modern	udazken	autumn		Seasons	SEASONS	AUTUMN				No loan
80	Basque (West)	Basque	33500	Modern language	Modern	uzta	harvest		Seasons	SEASONS	HARVEST				No loan
82	Basque (West)	Basque	33500	Modern language	Modern	udaberri	spring		Seasons	SEASONS	SPRING				No loan
78	Basque (West)	Basque	33500	Modern language	Modern	uda	summer		Seasons	SEASONS	SUMMER				No loan
81	Basque (West)	Basque	33500	Modern language	Modern	negu	winter		Seasons	SEASONS	WINTER				No loan
10	Basque (West)	Basque	33500	Modern language	Modern	ahuntz	goat		Farm animals	SMALL CATTLE	GOAT				No loan
9	Basque (West)	Basque	33500	Modern language	Modern	bildots	lamb		Farm animals	SMALL CATTLE	LAMB				No loan
8	Basque (West)	Basque	33500	Modern language	Modern	ahari	ram		Farm animals	SMALL CATTLE	RAM				No loan
7	Basque (West)	Basque	33500	Modern language	Modern	ardi	sheep (collective term)		Farm animals	SMALL CATTLE	SHEEP				No loan
73	Basque (West)	Basque	33500	Modern language	Modern	soro	cultivated field		Cultural artefacts & tools	TILLAGE	CULTIVATED FIELD				Loan	Latin
75	Basque (West)	Basque	33500	Modern language	Modern	ildo	furrow		Cultural artefacts & tools	TILLAGE	FURROW				No loan
65	Basque (West)	Basque	33500	Modern language	Modern	golde	plow (n)		Cultural artefacts & tools	TILLAGE	PLOW (N)				Loan	Latin
96	Basque (West)	Basque	33500	Modern language	Modern	armada; gudaroste	army		Weapons etc.	WEAPONS	ARMY				No loan
92	Basque (West)	Basque	33500	Modern language	Modern	gezi	arrow		Weapons etc.	WEAPONS	ARROW				Loan	Latin
67	Basque (West)	Basque	33500	Modern language	Modern	(h)aizkora	axe		Cultural artefacts & tools	WEAPONS	AXE				No loan
91	Basque (West)	Basque	33500	Modern language	Modern	arku	bow		Weapons etc.	WEAPONS	BOW				Loan	Latin
95	Basque (West)	Basque	33500	Modern language	Modern	ezkutu	shield		Weapons etc.	WEAPONS	SHIELD				Loan	Spanish
90	Basque (West)	Basque	33500	Modern language	Modern	lantza	spear		Weapons etc.	WEAPONS	SPEAR				Loan	Spanish
93	Basque (West)	Basque	33500	Modern language	Modern	ezpata	sword		Weapons etc.	WEAPONS	SWORD				Loan	Spanish
58	Basque (West)	Basque	33500	Modern language	Modern	sagar	apple		Crops & fruit	VEGETABLES & FRUIT	APPLE				No loan
60	Basque (West)	Basque	33500	Modern language	Modern	mahats	grape		Crops & fruit	VEGETABLES & FRUIT	GRAPE				No loan
57	Basque (West)	Basque	33500	Modern language	Modern	arbi	turnip		Crops & fruit	VEGETABLES & FRUIT	TURNIP				No loan
72	Basque (West)	Basque	33500	Modern language	Modern	ardatz	axle		Cultural artefacts & tools	VEHICLES	AXLE				No loan
71	Basque (West)	Basque	33500	Modern language	Modern	gurpegi	hub		Cultural artefacts & tools	VEHICLES	HUB				No loan
69	Basque (West)	Basque	33500	Modern language	Modern	gurdi; orga	wagon		Cultural artefacts & tools	VEHICLES	WAGON				Loan	Latin
70	Basque (West)	Basque	33500	Modern language	Modern	gurpil	wheel		Cultural artefacts & tools	VEHICLES	WHEEL				No loan
68	Basque (West)	Basque	33500	Modern language	Modern	uztarri	yoke		Cultural artefacts & tools	VEHICLES	YOKE				No loan
167	Batsbi	Nakh-Dagestanian	57800	Modern language	Modern	ax-ar	plow		Activities	ACTIVITIES	TO PLOW				No loan
5862	Batsbi	Nakh-Dagestanian	57800	Modern language	Modern	thek’-ar	sew		Activities	ACTIVITIES	TO SEW				No loan
166	Batsbi	Nakh-Dagestanian	57800	Modern language	Modern	ab-ar	sew		Activities	ACTIVITIES	TO SEW	93629		Inherited	No loan
168	Batsbi	Nakh-Dagestanian	57800	Modern language	Modern	d-iv-ar	sow		Activities	ACTIVITIES	TO SOW				No loan
165	Batsbi	Nakh-Dagestanian	57800	Modern language	Modern	ħerc'-ar	spin (thread)		Activities	ACTIVITIES	TO SPIN (THREAD)				No loan
164	Batsbi	Nakh-Dagestanian	57800	Modern language	Modern	d-epʰch-ar	weave		Activities	ACTIVITIES	TO WEAVE				No loan
125	Batsbi	Nakh-Dagestanian	57800	Modern language	Modern	pʰst’u	bull		Farm animals	CATTLE	BULL				No loan
54101	Batsbi	Nakh-Dagestanian	57800	Modern language	Modern	daxnĕ, daxnŏ	cattle		Farm animals	CATTLE	CATTLE				No loan
128	Batsbi	Nakh-Dagestanian	57800	Modern language	Modern	bžaⁿ	cattle		Farm animals	CATTLE	CATTLE				No loan
126	Batsbi	Nakh-Dagestanian	57800	Modern language	Modern	jetː	cow		Farm animals	CATTLE	COW				No loan
177	Batsbi	Nakh-Dagestanian	57800	Modern language	Modern	sel	flax		Crops & fruit	CROPS	FLAX				Loan	Georgian
173	Batsbi	Nakh-Dagestanian	57800	Modern language	Modern	maqoⁿ o'	grain (generic)		Crops & fruit	CROPS	GRAIN (GENERIC)				No loan
172	Batsbi	Nakh-Dagestanian	57800	Modern language	Modern	chu	oats		Crops & fruit	CROPS	OATS				Loan	Georgian
54141	Batsbi	Nakh-Dagestanian	57800	Modern language	Modern	švriv	oats		Crops & fruit	CROPS	OATS				Loan	Georgian
171	Batsbi	Nakh-Dagestanian	57800	Modern language	Modern	svil	rye		Crops & fruit	CROPS	RYE				Loan	Georgian
169	Batsbi	Nakh-Dagestanian	57800	Modern language	Modern	k’av	wheat		Crops & fruit	CROPS	WHEAT	93278		Inherited	No loan
170	Batsbi	Nakh-Dagestanian	57800	Modern language	Modern	pʰsa	barley		Crops & fruit	CROPS	BARLEY	93281		Inherited	No loan
142	Batsbi	Nakh-Dagestanian	57800	Modern language	Modern	k’ujt’ĭ	cat		Farm animals	DOMESTIC ANIMALS	CAT	92056		Inherited	No loan
5763	Batsbi	Nakh-Dagestanian	57800	Modern language	Modern	pʰħu	dog		Farm animals	DOMESTIC ANIMALS	DOG				No loan
143	Batsbi	Nakh-Dagestanian	57800	Modern language	Modern	pʰut’k’ar	bee		Farm animals	DOMESTIC INSECTS	BEE				Loan	Georgian
130	Batsbi	Nakh-Dagestanian	57800	Modern language	Modern	bωarc’oⁿ	donkey		Farm animals	DRAFT ANIMALS	DONKEY				No loan
54116	Batsbi	Nakh-Dagestanian	57800	Modern language	Modern	vir	donkey		Farm animals	DRAFT ANIMALS	DONKEY				Loan	Georgian
129	Batsbi	Nakh-Dagestanian	57800	Modern language	Modern	doⁿ	horse		Farm animals	DRAFT ANIMALS	HORSE	92089		Inherited	No loan
127	Batsbi	Nakh-Dagestanian	57800	Modern language	Modern	phst'un	ox		Farm animals	DRAFT ANIMALS	OX	92093		Inherited	No loan
160	Batsbi	Nakh-Dagestanian	57800	Modern language	Modern	veⁿ	wine		Products	DRINK AND DRUGS	WINE				No loan
151	Batsbi	Nakh-Dagestanian	57800	Modern language	Modern	pʰxak’al	hare / rabbit		Wild animals	GAME ANIMALS	HARE	93475		Inherited	No loan
151	Batsbi	Nakh-Dagestanian	57800	Modern language	Modern	pʰxak’al	hare / rabbit		Wild animals	GAME ANIMALS	RABBIT	93475		Inherited	No loan
146	Batsbi	Nakh-Dagestanian	57800	Modern language	Modern	t’ax	wild pig		Wild animals	GAME ANIMALS	WILD BOAR	93476		Certainly borrowed	Loan	Georgian
205	Batsbi	Nakh-Dagestanian	57800	Modern language	Modern	nek’	knife		Weapons etc.	IMPLEMENTS	KNIFE				No loan
182	Batsbi	Nakh-Dagestanian	57800	Modern language	Modern	xerx	saw		Cultural artefacts & tools	IMPLEMENTS	SAW				Loan	Georgian
178	Batsbi	Nakh-Dagestanian	57800	Modern language	Modern	dik’	scythe		Cultural artefacts & tools	IMPLEMENTS	SCYTHE				No loan
54155	Batsbi	Nakh-Dagestanian	57800	Modern language	Modern	mangal	sickle		Cultural artefacts & tools	IMPLEMENTS	SICKLE				Loan	Georgian
179	Batsbi	Nakh-Dagestanian	57800	Modern language	Modern	namgal	sickle		Cultural artefacts & tools	IMPLEMENTS	SICKLE				Loan	Georgian
180	Batsbi	Nakh-Dagestanian	57800	Modern language	Modern	qet’	spade		Cultural artefacts & tools	IMPLEMENTS	SPADE				No loan
5826	Batsbi	Nakh-Dagestanian	57800	Modern language	Modern	ditʰx	meat/flesh		Products	MATERIALS	MEAT				No loan
200	Batsbi	Nakh-Dagestanian	57800	Modern language	Modern	qaqaⁿ	leather		Metals & materials	MATERIALS	LEATHER				No loan
156	Batsbi	Nakh-Dagestanian	57800	Modern language	Modern	čho	fur		Products	MATERIALS	FUR				No loan
163	Batsbi	Nakh-Dagestanian	57800	Modern language	Modern	dat:eⁿ	grease		Products	MATERIALS	GREASE				No loan
5884	Batsbi	Nakh-Dagestanian	57800	Modern language	Modern	qer	stone		Metals & materials	MATERIALS	STONE	93091		Inherited	No loan
198	Batsbi	Nakh-Dagestanian	57800	Modern language	Modern	xeⁿ	wood		Metals & materials	MATERIALS	WOOD			Derivation	No loan
194	Batsbi	Nakh-Dagestanian	57800	Modern language	Modern	c’ast’	copper		Metals & materials	METALS	COPPER				No loan
197	Batsbi	Nakh-Dagestanian	57800	Modern language	Modern	okʰrŏ	gold		Metals & materials	METALS	GOLD				Loan	Georgian
195	Batsbi	Nakh-Dagestanian	57800	Modern language	Modern	ˁajhk’ĭ	iron		Metals & materials	METALS	IRON				No loan
196	Batsbi	Nakh-Dagestanian	57800	Modern language	Modern	t’atheb	silver		Metals & materials	METALS	SILVER	93086		Inherited	No loan
135	Batsbi	Nakh-Dagestanian	57800	Modern language	Modern	qa	pig		Farm animals	PIG RAISING	PIG	92100		Inherited	No loan
136	Batsbi	Nakh-Dagestanian	57800	Modern language	Modern	goč’	piglet		Farm animals	PIG RAISING	PIGLET				Loan	Georgian
139	Batsbi	Nakh-Dagestanian	57800	Modern language	Modern	c’ic’il	chicken		Farm animals	POULTRY	CHICKEN				Loan	Georgian
140	Batsbi	Nakh-Dagestanian	57800	Modern language	Modern	ixv	duck		Farm animals	POULTRY	DUCK				Loan	Georgian
137	Batsbi	Nakh-Dagestanian	57800	Modern language	Modern	kʰotam	hen		Farm animals	POULTRY	HEN	92087		Inherited	No loan
138	Batsbi	Nakh-Dagestanian	57800	Modern language	Modern	mamal	rooster		Farm animals	POULTRY	ROOSTER				Loan	Georgian
145	Batsbi	Nakh-Dagestanian	57800	Modern language	Modern	čha	bear		Wild animals	PREDATOR ANIMALS	BEAR	93473		Inherited	No loan
150	Batsbi	Nakh-Dagestanian	57800	Modern language	Modern	t’ur	jackal		Wild animals	PREDATOR ANIMALS	JACKAL				Loan	Georgian
147	Batsbi	Nakh-Dagestanian	57800	Modern language	Modern	vepʰx	leopard		Wild animals	PREDATOR ANIMALS	LEOPARD				No loan
148	Batsbi	Nakh-Dagestanian	57800	Modern language	Modern	lom	lion		Wild animals	PREDATOR ANIMALS	LION				Loan	Georgian
152	Batsbi	Nakh-Dagestanian	57800	Modern language	Modern	laħ	snake		Wild animals	PREDATOR ANIMALS	SNAKE				No loan
144	Batsbi	Nakh-Dagestanian	57800	Modern language	Modern	borc', bωorc'	wolf		Wild animals	PREDATOR ANIMALS	WOLF	93480		Inherited	No loan
149	Batsbi	Nakh-Dagestanian	57800	Modern language	Modern	chok'al	fox		Wild animals	PREDATOR ANIMALS	FOX	93484		Inherited	No loan
154	Batsbi	Nakh-Dagestanian	57800	Modern language	Modern	arc’iv	eagle		Wild animals	PREDATOR BIRDS	EAGLE	93490		Certainly borrowed	Loan	Georgian
153	Batsbi	Nakh-Dagestanian	57800	Modern language	Modern	q’o'	raven		Wild animals	PREDATOR BIRDS	RAVEN				No loan
157	Batsbi	Nakh-Dagestanian	57800	Modern language	Modern	moc’	honey		Products	PRODUCTS	HONEY	92833		Inherited	No loan
161	Batsbi	Nakh-Dagestanian	57800	Modern language	Modern	sve	hops		Products	PRODUCTS	HOPS				No loan
158	Batsbi	Nakh-Dagestanian	57800	Modern language	Modern	šur	milk		Products	PRODUCTS	MILK	92840		Inherited	No loan
159	Batsbi	Nakh-Dagestanian	57800	Modern language	Modern	tʰujx	salt		Products	PRODUCTS	SALT				No loan
155	Batsbi	Nakh-Dagestanian	57800	Modern language	Modern	tʰxe	wool		Products	PRODUCTS	WOOL				No loan
54159	Batsbi	Nakh-Dagestanian	57800	Modern language	Modern	k’eč’	wool		Products	PRODUCTS	WOOL				No loan
191	Batsbi	Nakh-Dagestanian	57800	Modern language	Modern	st’abŏ	autumn / harvest		Seasons	SEASONS	AUTUMN	93802		Inherited	No loan
191	Batsbi	Nakh-Dagestanian	57800	Modern language	Modern	st’abŏ	autumn / harvest		Seasons	SEASONS	HARVEST	93802		Inherited	No loan
193	Batsbi	Nakh-Dagestanian	57800	Modern language	Modern	doħa	spring		Seasons	SEASONS	SPRING				No loan
190	Batsbi	Nakh-Dagestanian	57800	Modern language	Modern	xk’o	summer		Seasons	SEASONS	SUMMER				No loan
192	Batsbi	Nakh-Dagestanian	57800	Modern language	Modern	ˁa	winter		Seasons	SEASONS	WINTER	93808		Inherited	No loan
134	Batsbi	Nakh-Dagestanian	57800	Modern language	Modern	gazaⁿ	goat		Farm animals	SMALL CATTLE	GOAT				No loan
133	Batsbi	Nakh-Dagestanian	57800	Modern language	Modern	čhujxĭ	lamb		Farm animals	SMALL CATTLE	LAMB	92108		Inherited	No loan
54117	Batsbi	Nakh-Dagestanian	57800	Modern language	Modern	daubu	ram		Farm animals	SMALL CATTLE	RAM				No loan
132	Batsbi	Nakh-Dagestanian	57800	Modern language	Modern	bωok’	ram		Farm animals	SMALL CATTLE	RAM				No loan
131	Batsbi	Nakh-Dagestanian	57800	Modern language	Modern	že	sheep		Farm animals	SMALL CATTLE	SHEEP	92110		Inherited	No loan
54149	Batsbi	Nakh-Dagestanian	57800	Modern language	Modern	axujnĭ kʰazdar	cultivated field		Cultural artefacts & tools	TILLAGE	CULTIVATED FIELD				No loan
187	Batsbi	Nakh-Dagestanian	57800	Modern language	Modern	jop’st’	cultivated field		Cultural artefacts & tools	TILLAGE	CULTIVATED FIELD				No loan
181	Batsbi	Nakh-Dagestanian	57800	Modern language	Modern	gutʰaⁿ	plow		Cultural artefacts & tools	TILLAGE	PLOW (N)				Loan	Georgian
203	Batsbi	Nakh-Dagestanian	57800	Modern language	Modern	c’akʰ	arrow		Weapons etc.	WEAPONS	ARROW				No loan
183	Batsbi	Nakh-Dagestanian	57800	Modern language	Modern	dik’	axe		Cultural artefacts & tools	WEAPONS	AXE	92510		Inherited	No loan
202	Batsbi	Nakh-Dagestanian	57800	Modern language	Modern	at’q’	bow		Weapons etc.	WEAPONS	BOW				No loan
206	Batsbi	Nakh-Dagestanian	57800	Modern language	Modern	pʰar	shield		Weapons etc.	WEAPONS	SHIELD				Loan	Georgian
201	Batsbi	Nakh-Dagestanian	57800	Modern language	Modern	tʰabc’	spear		Weapons etc.	WEAPONS	SPEAR				No loan
204	Batsbi	Nakh-Dagestanian	57800	Modern language	Modern	tʰur	sword		Weapons etc.	WEAPONS	SWORD				No loan
175	Batsbi	Nakh-Dagestanian	57800	Modern language	Modern	qor	apple		Crops & fruit	VEGETABLES & FRUIT	APPLE				No loan
176	Batsbi	Nakh-Dagestanian	57800	Modern language	Modern	kʰaniz	grape		Crops & fruit	VEGETABLES & FRUIT	GRAPE				No loan
174	Batsbi	Nakh-Dagestanian	57800	Modern language	Modern	tʰalgam	turnip		Crops & fruit	VEGETABLES & FRUIT	TURNIP				Loan	Georgian
185	Batsbi	Nakh-Dagestanian	57800	Modern language	Modern	urum, urem	wagon		Cultural artefacts & tools	VEHICLES	WAGON				Loan	Georgian
186	Batsbi	Nakh-Dagestanian	57800	Modern language	Modern	borbol, burbul	wheel		Cultural artefacts & tools	VEHICLES	WHEEL	92532		Probably borrowed	Loan	Georgian
184	Batsbi	Nakh-Dagestanian	57800	Modern language	Modern	duq’	yoke		Cultural artefacts & tools	VEHICLES	YOKE				No loan
54623	Bengali	Indo-European	48400	Modern language	Modern	ṣaṇḍa	bull		Farm animals	CATTLE	BULL	54618		Unspecified	No loan
54631	Bengali	Indo-European	48400	Modern language	Modern	ã̄ṛuā	bull-calf		Farm animals	CATTLE	BULL	54626		Inherited	No loan
55425	Bengali	Indo-European	48400	Modern language	Modern	bāchā	calf, young of animal, dear child		Farm animals	CATTLE	CALF	55422		Unspecified	No loan
55435	Bengali	Indo-European	48400	Modern language	Modern	goru, garu	any animal of the bovine species, cattle; stupid person		Farm animals	CATTLE	CATTLE	54635		Inherited	No loan
61470	Bengali	Indo-European	48400	Modern language	Modern	birāl, bilāl, bilāi	cat		Farm animals	DOMESTIC ANIMALS	CAT	61467		Unspecified	No loan
29549	Bengali	Indo-European	48400	Modern language	Modern	kuttā	dog		Farm animals	DOMESTIC ANIMALS	DOG	88504		Unspecified	No loan
61736	Bengali	Indo-European	48400	Modern language	Modern	bhramara, bhomar, bhomrā	bee, bumble-bee		Farm animals	DOMESTIC INSECTS	BEE	61733		Unspecified	No loan
57130	Bengali	Indo-European	48400	Modern language	Modern	gādhā	donkey		Farm animals	DRAFT ANIMALS	DONKEY	57126		Inherited	No loan
56263	Bengali	Indo-European	48400	Modern language	Modern	ghõṛā	horse	m	Farm animals	DRAFT ANIMALS	HORSE	56259		Unspecified	Loan
56264	Bengali	Indo-European	48400	Modern language	Modern	ghũṛi	horse	f	Farm animals	DRAFT ANIMALS	HORSE	56259		Unspecified	Loan
55258	Bengali	Indo-European	48400	Modern language	Modern	dāmṛā	castrated bullock		Farm animals	DRAFT ANIMALS	OX	55146		Inherited	No loan
69868	Bengali	Indo-European	48400	Modern language	Modern	madhu	honey		Products	DRINK AND DRUGS	MEAD	61738		Inherited	No loan
66374	Bengali	Indo-European	48400	Modern language	Modern	harin	deer		Wild animals	GAME ANIMALS	DEER	66371		Unspecified	No loan
64453	Bengali	Indo-European	48400	Modern language	Modern	khôrgoś, kharagośa	hare		Wild animals	GAME ANIMALS	HARE	64447		Certainly borrowed	Loan	Middle Persian
62538	Bengali	Indo-European	48400	Modern language	Modern	barā	boar		Wild animals	GAME ANIMALS	WILD BOAR	55089		Inherited	No loan
	Bengali	Indo-European	48400		Modern	sonā	gold		Metals & materials	METALS	GOLD	94245			No loan
59746	Bengali	Indo-European	48400	Modern language	Modern	bāchā	calf, young of animal, dear child		Farm animals	PIG RAISING	PIG	55422		Inherited	No loan
59267	Bengali	Indo-European	48400	Modern language	Modern	suor	pig, boar	m	Farm animals	PIG RAISING	PIG	59114		Inherited	No loan
60871	Bengali	Indo-European	48400	Modern language	Modern	āṛi	aquatic bird, Turdus ginginianus		Farm animals	POULTRY	DUCK	60737		Unspecified	No loan
60875	Bengali	Indo-European	48400	Modern language	Modern	hã̄s	duck, goose		Farm animals	POULTRY	DUCK	60872		Unspecified	No loan
59873	Bengali	Indo-European	48400	Modern language	Modern	kukkuṭi	hen	f	Farm animals	POULTRY	HEN	59870		Unspecified	No loan
60321	Bengali	Indo-European	48400	Modern language	Modern	kukuṛā	cock, rooster	m	Farm animals	POULTRY	ROOSTER	60299		Inherited	No loan
62421	Bengali	Indo-European	48400	Modern language	Modern	bhāluk	bear		Wild animals	PREDATOR ANIMALS	BEAR	62291		Unspecified	No loan
64106	Bengali	Indo-European	48400	Modern language	Modern	pheu	fox, jackal		Wild animals	PREDATOR ANIMALS	JACKAL	64104		Unspecified	No loan
64151	Bengali	Indo-European	48400	Modern language	Modern	śiyāla, siyāl, seyāl	fox, jackal		Wild animals	PREDATOR ANIMALS	JACKAL	64108		Inherited	No loan
64155	Bengali	Indo-European	48400	Modern language	Modern	gidhī, gidhaṛ	jackal		Wild animals	PREDATOR ANIMALS	JACKAL	64152		Unspecified	No loan
63311	Bengali	Indo-European	48400	Modern language	Modern	citā	leopard		Wild animals	PREDATOR ANIMALS	LEOPARD	63283		Unspecified	No loan
63323	Bengali	Indo-European	48400	Modern language	Modern	sinha	lion		Wild animals	PREDATOR ANIMALS	LION	63313		Certainly borrowed	Loan	Sanskrit
64877	Bengali	Indo-European	48400	Modern language	Modern	sāp, sāpa	snake		Wild animals	PREDATOR ANIMALS	SNAKE	64784		Unspecified	No loan
62007	Bengali	Indo-European	48400	Modern language	Modern	śeyāla	wolf		Wild animals	PREDATOR ANIMALS	WOLF	62006		Unspecified	No loan
62907	Bengali	Indo-European	48400	Modern language	Modern	pen̄cā, pẽcā	owl		Wild animals	PREDATOR BIRDS	OWL	62905		Unspecified	Loan
	Bengali	Indo-European	48400		Modern	lon, lun	salt		Products	PRODUCTS	SALT	69403			No loan
67715	Bengali	Indo-European	48400	Modern language	Modern	un, ūrṇā	wool		Products	PRODUCTS	WOOL	67489		Unspecified	No loan
	Bengali	Indo-European	48400		Modern	basantakāla	spring		Seasons	SEASONS	SPRING	82163			No loan
	Bengali	Indo-European	48400		Modern	grīṣma	summer		Seasons	SEASONS	SUMMER	82931			No loan
58669	Bengali	Indo-European	48400	Modern language	Modern	chāgala	goat		Farm animals	SMALL CATTLE	GOAT	58665		Unspecified	No loan
58670	Bengali	Indo-European	48400	Modern language	Modern	cheli	goat		Farm animals	SMALL CATTLE	GOAT	58665		Unspecified	No loan
57528	Bengali	Indo-European	48400	Modern language	Modern	meṣ	sheep		Farm animals	SMALL CATTLE	SHEEP	57441		Inherited	No loan
57533	Bengali	Indo-European	48400	Modern language	Modern	bher̖ā	sheep		Farm animals	SMALL CATTLE	SHEEP	57530		Unspecified	No loan
57534	Bengali	Indo-European	48400	Modern language	Modern	bheṛ	ram		Farm animals	SMALL CATTLE	SHEEP	57530		Unspecified	No loan
	Bengali	Indo-European	48400		Modern	hala-	plow (n)		Cultural artefacts & tools	TILLAGE	PLOW (N)	77138			No loan
	Bengali	Indo-European	48400		Modern	cāk	wheel	m	Cultural artefacts & tools	VEHICLES	WHEEL	79981			No loan
	Bengali	Indo-European	48400		Modern	jū	yoke		Cultural artefacts & tools	VEHICLES	YOKE	79367			No loan
90466	Beshta	Nakh-Dagestanian	68448	Modern language	Modern	b-oƛal, oƛalal	plow		Activities	ACTIVITIES	TO PLOW				No loan
90467	Beshta	Nakh-Dagestanian	68448	Modern language	Modern	n-aqʷa, -aqal	sew		Activities	ACTIVITIES	TO SEW				No loan
90469	Beshta	Nakh-Dagestanian	68448	Modern language	Modern	čʰæƛæl	sow		Activities	ACTIVITIES	TO SOW				No loan
90468	Beshta	Nakh-Dagestanian	68448	Modern language	Modern	jĩzal	sow		Activities	ACTIVITIES	TO SOW				No loan
90504	Beshta	Nakh-Dagestanian	68448	Modern language	Modern	õs	bull		Farm animals	CATTLE	BULL				No loan
90505	Beshta	Nakh-Dagestanian	68448	Modern language	Modern	gæmüš	bull		Farm animals	CATTLE	BULL				No loan
90502	Beshta	Nakh-Dagestanian	68448	Modern language	Modern	buʁa, bura	bull		Farm animals	CATTLE	BULL				No loan
90503	Beshta	Nakh-Dagestanian	68448	Modern language	Modern	gane	bull		Farm animals	CATTLE	BULL	92053		Inherited	No loan
90511	Beshta	Nakh-Dagestanian	68448	Modern language	Modern	boc'i	cattle		Farm animals	CATTLE	CATTLE				No loan
90510	Beshta	Nakh-Dagestanian	68448	Modern language	Modern	bæjmæn, hæjmæn, hæjmal	cattle		Farm animals	CATTLE	CATTLE				Loan	?
90512	Beshta	Nakh-Dagestanian	68448	Modern language	Modern	sakʰoneli	cattle		Farm animals	CATTLE	CATTLE				Loan	?
90517	Beshta	Nakh-Dagestanian	68448	Modern language	Modern	vara, vaja, wara	cow		Farm animals	CATTLE	COW				No loan
90492	Beshta	Nakh-Dagestanian	68448	Modern language	Modern	muh	grain (generic)		Crops & fruit	CROPS	GRAIN (GENERIC)				No loan
90496	Beshta	Nakh-Dagestanian	68448	Modern language	Modern	hiz	oats		Crops & fruit	CROPS	OATS				No loan
90494	Beshta	Nakh-Dagestanian	68448	Modern language	Modern	suz	oats		Crops & fruit	CROPS	OATS				No loan
90495	Beshta	Nakh-Dagestanian	68448	Modern language	Modern	č'e	oats		Crops & fruit	CROPS	OATS	93272		Inherited	No loan
90497	Beshta	Nakh-Dagestanian	68448	Modern language	Modern	č'oq'in	rye		Crops & fruit	CROPS	RYE				No loan
90500	Beshta	Nakh-Dagestanian	68448	Modern language	Modern	dik'a	wheat		Crops & fruit	CROPS	WHEAT				No loan
90498	Beshta	Nakh-Dagestanian	68448	Modern language	Modern	müq'e	wheat		Crops & fruit	CROPS	WHEAT				No loan
90499	Beshta	Nakh-Dagestanian	68448	Modern language	Modern	qibo	wheat		Crops & fruit	CROPS	WHEAT	93280		Inherited	No loan
90491	Beshta	Nakh-Dagestanian	68448	Modern language	Modern	müq'e	barley		Crops & fruit	CROPS	BARLEY				No loan
90490	Beshta	Nakh-Dagestanian	68448	Modern language	Modern	ox	barley		Crops & fruit	CROPS	BARLEY				No loan
90509	Beshta	Nakh-Dagestanian	68448	Modern language	Modern	p'avle	cat		Farm animals	DOMESTIC ANIMALS	CAT				No loan
90507	Beshta	Nakh-Dagestanian	68448	Modern language	Modern	k'at'a	cat		Farm animals	DOMESTIC ANIMALS	CAT				No loan
90506	Beshta	Nakh-Dagestanian	68448	Modern language	Modern	gedo	cat		Farm animals	DOMESTIC ANIMALS	CAT				No loan
90508	Beshta	Nakh-Dagestanian	68448	Modern language	Modern	zardaw	cat		Farm animals	DOMESTIC ANIMALS	CAT				No loan
90520	Beshta	Nakh-Dagestanian	68448	Modern language	Modern	k'uc'o	dog		Farm animals	DOMESTIC ANIMALS	DOG				No loan
90519	Beshta	Nakh-Dagestanian	68448	Modern language	Modern	kʰaškʰan	dog		Farm animals	DOMESTIC ANIMALS	DOG				No loan
90518	Beshta	Nakh-Dagestanian	68448	Modern language	Modern	vo	dog		Farm animals	DOMESTIC ANIMALS	DOG				No loan
90521	Beshta	Nakh-Dagestanian	68448	Modern language	Modern	ba'o	dog		Farm animals	DOMESTIC ANIMALS	DOG				No loan
90501	Beshta	Nakh-Dagestanian	68448	Modern language	Modern	t'ot'	bee		Farm animals	DOMESTIC INSECTS	BEE				No loan
90525	Beshta	Nakh-Dagestanian	68448	Modern language	Modern	k'elat'i	donkey		Farm animals	DRAFT ANIMALS	DONKEY				No loan
90523	Beshta	Nakh-Dagestanian	68448	Modern language	Modern	urc'en	donkey		Farm animals	DRAFT ANIMALS	DONKEY				No loan
90522	Beshta	Nakh-Dagestanian	68448	Modern language	Modern	irmat'o	donkey		Farm animals	DRAFT ANIMALS	DONKEY				No loan
90524	Beshta	Nakh-Dagestanian	68448	Modern language	Modern	ãˀũ, ãũ	donkey		Farm animals	DRAFT ANIMALS	DONKEY				No loan
90532	Beshta	Nakh-Dagestanian	68448	Modern language	Modern	sojr-a, sojj-a	horse		Farm animals	DRAFT ANIMALS	HORSE				No loan
90534	Beshta	Nakh-Dagestanian	68448	Modern language	Modern	ič'ej	horse		Farm animals	DRAFT ANIMALS	HORSE				No loan
90533	Beshta	Nakh-Dagestanian	68448	Modern language	Modern	bartʰi	horse		Farm animals	DRAFT ANIMALS	HORSE				No loan
90531	Beshta	Nakh-Dagestanian	68448	Modern language	Modern	šügo-sojra, šugošova	horse		Farm animals	DRAFT ANIMALS	HORSE	92074		Derivation	No loan
90537	Beshta	Nakh-Dagestanian	68448	Modern language	Modern	zakʰi	ox		Farm animals	DRAFT ANIMALS	OX				No loan
90536	Beshta	Nakh-Dagestanian	68448	Modern language	Modern	õs	ox		Farm animals	DRAFT ANIMALS	OX				No loan
90567	Beshta	Nakh-Dagestanian	68448	Modern language	Modern	ža	wine		Products	DRINK AND DRUGS	WINE				No loan
90566	Beshta	Nakh-Dagestanian	68448	Modern language	Modern	ʁino	wine		Products	DRINK AND DRUGS	WINE				Loan	?
90586	Beshta	Nakh-Dagestanian	68448	Modern language	Modern	geh	bison		Wild animals	GAME ANIMALS	BISON				No loan
90591	Beshta	Nakh-Dagestanian	68448	Modern language	Modern	qijalat'o	hare / rabbit		Wild animals	GAME ANIMALS	HARE				No loan
90591	Beshta	Nakh-Dagestanian	68448	Modern language	Modern	qijalat'o	hare / rabbit		Wild animals	GAME ANIMALS	RABBIT				No loan
90597	Beshta	Nakh-Dagestanian	68448	Modern language	Modern	t'æxi	wild pig		Wild animals	GAME ANIMALS	WILD BOAR				No loan
90596	Beshta	Nakh-Dagestanian	68448	Modern language	Modern	buƛo	wild pig		Wild animals	GAME ANIMALS	WILD BOAR				No loan
90580	Beshta	Nakh-Dagestanian	68448	Modern language	Modern	č'it', cʰit', c'it'	knife		Weapons etc.	IMPLEMENTS	KNIFE				No loan
90480	Beshta	Nakh-Dagestanian	68448	Modern language	Modern	xorʁo, xorxo, xojʁo	saw		Cultural artefacts & tools	IMPLEMENTS	SAW				No loan
90481	Beshta	Nakh-Dagestanian	68448	Modern language	Modern	č'inik'	scythe		Cultural artefacts & tools	IMPLEMENTS	SCYTHE				No loan
90482	Beshta	Nakh-Dagestanian	68448	Modern language	Modern	röxrič', joxič', joxic'	sickle		Cultural artefacts & tools	IMPLEMENTS	SICKLE				No loan
90483	Beshta	Nakh-Dagestanian	68448	Modern language	Modern	ækʰö	spade		Cultural artefacts & tools	IMPLEMENTS	SPADE				No loan
90563	Beshta	Nakh-Dagestanian	68448	Modern language	Modern	xo	meat		Products	MATERIALS	MEAT	92837		Derivation	No loan
90552	Beshta	Nakh-Dagestanian	68448	Modern language	Modern	læše	leather		Metals & materials	MATERIALS	LEATHER				No loan
90551	Beshta	Nakh-Dagestanian	68448	Modern language	Modern	ẽλ	leather		Metals & materials	MATERIALS	LEATHER				No loan
90560	Beshta	Nakh-Dagestanian	68448	Modern language	Modern	ʁæše	fur		Products	MATERIALS	FUR				No loan
90561	Beshta	Nakh-Dagestanian	68448	Modern language	Modern	jẽl'	grease		Products	MATERIALS	GREASE				No loan
90555	Beshta	Nakh-Dagestanian	68448	Modern language	Modern	šed	stone		Metals & materials	MATERIALS	STONE				No loan
90554	Beshta	Nakh-Dagestanian	68448	Modern language	Modern	ƛalo	stone		Metals & materials	MATERIALS	STONE				No loan
90556	Beshta	Nakh-Dagestanian	68448	Modern language	Modern	hudo	wood		Metals & materials	MATERIALS	WOOD				No loan
90557	Beshta	Nakh-Dagestanian	68448	Modern language	Modern	hæžæ	wood		Metals & materials	MATERIALS	WOOD				No loan
90558	Beshta	Nakh-Dagestanian	68448	Modern language	Modern	ažbar	wood		Metals & materials	MATERIALS	WOOD				No loan
90548	Beshta	Nakh-Dagestanian	68448	Modern language	Modern	mix	copper		Metals & materials	METALS	COPPER				No loan
90547	Beshta	Nakh-Dagestanian	68448	Modern language	Modern	jez	copper		Metals & materials	METALS	COPPER				No loan
90546	Beshta	Nakh-Dagestanian	68448	Modern language	Modern	bakʰ	copper		Metals & materials	METALS	COPPER	93073		Unspecified	No loan
90549	Beshta	Nakh-Dagestanian	68448	Modern language	Modern	mesed	gold		Metals & materials	METALS	GOLD	93096		Unspecified	No loan
90550	Beshta	Nakh-Dagestanian	68448	Modern language	Modern	kʰil	iron		Metals & materials	METALS	IRON				No loan
90553	Beshta	Nakh-Dagestanian	68448	Modern language	Modern	okʰro, okʰkʰo	silver		Metals & materials	METALS	SILVER				No loan
90538	Beshta	Nakh-Dagestanian	68448	Modern language	Modern	buƛo	pig		Farm animals	PIG RAISING	PIG	92098		Inherited	No loan
90539	Beshta	Nakh-Dagestanian	68448	Modern language	Modern	gočʰi	piglet		Farm animals	PIG RAISING	PIGLET				No loan
90516	Beshta	Nakh-Dagestanian	68448	Modern language	Modern	naj	chicken		Farm animals	POULTRY	CHICKEN				No loan
90514	Beshta	Nakh-Dagestanian	68448	Modern language	Modern	č'uč'uli	chicken		Farm animals	POULTRY	CHICKEN				No loan
90513	Beshta	Nakh-Dagestanian	68448	Modern language	Modern	t'et'ali	chicken		Farm animals	POULTRY	CHICKEN				No loan
90515	Beshta	Nakh-Dagestanian	68448	Modern language	Modern	mina	chicken		Farm animals	POULTRY	CHICKEN				No loan
90526	Beshta	Nakh-Dagestanian	68448	Modern language	Modern	ixu, exula	duck		Farm animals	POULTRY	DUCK				No loan
90527	Beshta	Nakh-Dagestanian	68448	Modern language	Modern	bat'i	duck		Farm animals	POULTRY	DUCK				No loan
90530	Beshta	Nakh-Dagestanian	68448	Modern language	Modern	güdæ	hen		Farm animals	POULTRY	HEN	92087		Inherited	No loan
90542	Beshta	Nakh-Dagestanian	68448	Modern language	Modern	mamali	rooster		Farm animals	POULTRY	ROOSTER				Loan	?
90585	Beshta	Nakh-Dagestanian	68448	Modern language	Modern	si, sĩ, sij	bear		Wild animals	PREDATOR ANIMALS	BEAR				No loan
90592	Beshta	Nakh-Dagestanian	68448	Modern language	Modern	čʰaq'al	jackal		Wild animals	PREDATOR ANIMALS	JACKAL				No loan
90593	Beshta	Nakh-Dagestanian	68448	Modern language	Modern	ɣalbac'	lion		Wild animals	PREDATOR ANIMALS	LION				No loan
90595	Beshta	Nakh-Dagestanian	68448	Modern language	Modern	bekʰela	snake		Wild animals	PREDATOR ANIMALS	SNAKE				No loan
90598	Beshta	Nakh-Dagestanian	68448	Modern language	Modern	bac'o	wolf		Wild animals	PREDATOR ANIMALS	WOLF				No loan
90590	Beshta	Nakh-Dagestanian	68448	Modern language	Modern	sara, sora	fox		Wild animals	PREDATOR ANIMALS	FOX	93485		Inherited	No loan
90588	Beshta	Nakh-Dagestanian	68448	Modern language	Modern	zera	eagle		Wild animals	PREDATOR BIRDS	EAGLE				No loan
90587	Beshta	Nakh-Dagestanian	68448	Modern language	Modern	cʰũba	eagle		Wild animals	PREDATOR BIRDS	EAGLE				No loan
90589	Beshta	Nakh-Dagestanian	68448	Modern language	Modern	kʰojdak'o	eagle		Wild animals	PREDATOR BIRDS	EAGLE				No loan
90594	Beshta	Nakh-Dagestanian	68448	Modern language	Modern	ʁæde	raven		Wild animals	PREDATOR BIRDS	RAVEN				No loan
90562	Beshta	Nakh-Dagestanian	68448	Modern language	Modern	nucʰo	honey		Products	PRODUCTS	HONEY	92833		Inherited	No loan
90564	Beshta	Nakh-Dagestanian	68448	Modern language	Modern	hi:, hĩ, hĩli	milk		Products	PRODUCTS	MILK				No loan
90565	Beshta	Nakh-Dagestanian	68448	Modern language	Modern	cʰã, cʰi:jo	salt		Products	PRODUCTS	SALT	92843		Inherited	No loan
90559	Beshta	Nakh-Dagestanian	68448	Modern language	Modern	čʰeni	beeswax		Products	PRODUCTS	WAX (BEES)				No loan
90570	Beshta	Nakh-Dagestanian	68448	Modern language	Modern	λũ	wool		Products	PRODUCTS	WOOL				No loan
90569	Beshta	Nakh-Dagestanian	68448	Modern language	Modern	ræčʰ	wool		Products	PRODUCTS	WOOL				No loan
90568	Beshta	Nakh-Dagestanian	68448	Modern language	Modern	roʁin	wool		Products	PRODUCTS	WOOL				No loan
90571	Beshta	Nakh-Dagestanian	68448	Modern language	Modern	səbo, seba	autumn / harvest		Seasons	SEASONS	AUTUMN	93807		Inherited	No loan
90571	Beshta	Nakh-Dagestanian	68448	Modern language	Modern	səbo, seba	autumn / harvest		Seasons	SEASONS	HARVEST	93807		Inherited	No loan
90572	Beshta	Nakh-Dagestanian	68448	Modern language	Modern	emeda:	spring		Seasons	SEASONS	SPRING	93804		Inherited	No loan
90573	Beshta	Nakh-Dagestanian	68448	Modern language	Modern	azo(do)	summer		Seasons	SEASONS	SUMMER				No loan
90574	Beshta	Nakh-Dagestanian	68448	Modern language	Modern	ƛine	winter		Seasons	SEASONS	WINTER				No loan
90528	Beshta	Nakh-Dagestanian	68448	Modern language	Modern	t'iga	goat		Farm animals	SMALL CATTLE	GOAT				No loan
90529	Beshta	Nakh-Dagestanian	68448	Modern language	Modern	cʰan, cʰani	goat		Farm animals	SMALL CATTLE	GOAT	92080		Inherited	No loan
90535	Beshta	Nakh-Dagestanian	68448	Modern language	Modern	ƛili, ƛile	lamb		Farm animals	SMALL CATTLE	LAMB				No loan
90541	Beshta	Nakh-Dagestanian	68448	Modern language	Modern	xoj	ram		Farm animals	SMALL CATTLE	RAM				No loan
90540	Beshta	Nakh-Dagestanian	68448	Modern language	Modern	biƛ	ram		Farm animals	SMALL CATTLE	RAM				No loan
90544	Beshta	Nakh-Dagestanian	68448	Modern language	Modern	aqona	sheep		Farm animals	SMALL CATTLE	SHEEP				No loan
90545	Beshta	Nakh-Dagestanian	68448	Modern language	Modern	horžo	sheep		Farm animals	SMALL CATTLE	SHEEP				No loan
90543	Beshta	Nakh-Dagestanian	68448	Modern language	Modern	boc'i	sheep		Farm animals	SMALL CATTLE	SHEEP	92111		Inherited	No loan
90474	Beshta	Nakh-Dagestanian	68448	Modern language	Modern	agarod	cultivated field		Cultural artefacts & tools	TILLAGE	CULTIVATED FIELD				No loan
90478	Beshta	Nakh-Dagestanian	68448	Modern language	Modern	boƛo-	plow		Cultural artefacts & tools	TILLAGE	PLOW (N)				Loan	?
90479	Beshta	Nakh-Dagestanian	68448	Modern language	Modern	gutʰani	plow		Cultural artefacts & tools	TILLAGE	PLOW (N)				Loan	?
90577	Beshta	Nakh-Dagestanian	68448	Modern language	Modern	armija	army		Weapons etc.	WEAPONS	ARMY				Loan	?
90576	Beshta	Nakh-Dagestanian	68448	Modern language	Modern	askʰar	army		Weapons etc.	WEAPONS	ARMY				Loan	Turkic (family)
90575	Beshta	Nakh-Dagestanian	68448	Modern language	Modern	haz	army		Weapons etc.	WEAPONS	ARMY	93885		Inherited	No loan
90578	Beshta	Nakh-Dagestanian	68448	Modern language	Modern	c'ulu	arrow		Weapons etc.	WEAPONS	ARROW				No loan
90471	Beshta	Nakh-Dagestanian	68448	Modern language	Modern	õg	axe		Cultural artefacts & tools	WEAPONS	AXE				No loan
90473	Beshta	Nakh-Dagestanian	68448	Modern language	Modern	c'al	axe		Cultural artefacts & tools	WEAPONS	AXE				No loan
90472	Beshta	Nakh-Dagestanian	68448	Modern language	Modern	q'aža	axe		Cultural artefacts & tools	WEAPONS	AXE				No loan
90579	Beshta	Nakh-Dagestanian	68448	Modern language	Modern	c'uluc'ˀa, c'ãˀã	bow		Weapons etc.	WEAPONS	BOW				No loan
90581	Beshta	Nakh-Dagestanian	68448	Modern language	Modern	xečʰ	spear		Weapons etc.	WEAPONS	SPEAR				No loan
90584	Beshta	Nakh-Dagestanian	68448	Modern language	Modern	bałaj	sword		Weapons etc.	WEAPONS	SWORD				No loan
90583	Beshta	Nakh-Dagestanian	68448	Modern language	Modern	xanžar	sword		Weapons etc.	WEAPONS	SWORD				No loan
90582	Beshta	Nakh-Dagestanian	68448	Modern language	Modern	mæc'æ	sword		Weapons etc.	WEAPONS	SWORD				No loan
90489	Beshta	Nakh-Dagestanian	68448	Modern language	Modern	ẽš	apple		Crops & fruit	VEGETABLES & FRUIT	APPLE				No loan
90493	Beshta	Nakh-Dagestanian	68448	Modern language	Modern	k'odo	grape		Crops & fruit	VEGETABLES & FRUIT	GRAPE				No loan
90484	Beshta	Nakh-Dagestanian	68448	Modern language	Modern	urumi	wagon		Cultural artefacts & tools	VEHICLES	WAGON				No loan
90487	Beshta	Nakh-Dagestanian	68448	Modern language	Modern	čʰarx	wheel		Cultural artefacts & tools	VEHICLES	WHEEL				No loan
90485	Beshta	Nakh-Dagestanian	68448	Modern language	Modern	habor	wheel		Cultural artefacts & tools	VEHICLES	WHEEL				No loan
90486	Beshta	Nakh-Dagestanian	68448	Modern language	Modern	örræ	wheel		Cultural artefacts & tools	VEHICLES	WHEEL	92532		Inherited	No loan
90488	Beshta	Nakh-Dagestanian	68448	Modern language	Modern	ruλo, juλo, gijo	yoke		Cultural artefacts & tools	VEHICLES	YOKE				No loan
72230	Breton	Indo-European	38200	Modern language	Modern	gwriat	to sew	v	Activities	ACTIVITIES	TO SEW	72222		Unspecified	No loan
39011	Breton	Indo-European	38200	Modern language	Modern	had	seed		Activities	ACTIVITIES	TO SOW	73047		Unspecified	No loan
73055	Breton	Indo-European	38200	Modern language	Modern	hada	sow	v	Activities	ACTIVITIES	TO SOW	73047		Inherited	No loan
71863	Breton	Indo-European	38200	Modern language	Modern	nezañ	to spin, to weave	v	Activities	ACTIVITIES	TO SPIN (THREAD)	71823		Inherited	No loan
71698	Breton	Indo-European	38200	Modern language	Modern	gweañ	to twist, to weave	v	Activities	ACTIVITIES	TO WEAVE	71682		Inherited	No loan
43621	Breton	Indo-European	38200	Modern language	Modern	tarw	bull		Farm animals	CATTLE	BULL	54195		Inherited	No loan
55368	Breton	Indo-European	38200	Modern language	Modern	leue	calf	m	Farm animals	CATTLE	CALF	55341		Inherited	No loan
54856	Breton	Indo-European	38200	Modern language	Modern	buoc'h	cow		Farm animals	CATTLE	COW	54635		Inherited	No loan
54860	Breton	Indo-European	38200	Modern language	Modern	biou	cattle	pl	Farm animals	CATTLE	COW	54635		Inherited	No loan
76243	Breton	Indo-European	38200	Modern language	Modern	lin	flax; linen		Crops & fruit	CROPS	FLAX	76222		Inherited	No loan
74404	Breton	Indo-European	38200	Modern language	Modern	boued	food	m	Crops & fruit	CROPS	GRAIN (GENERIC)	74389		Inherited	No loan
74567	Breton	Indo-European	38200	Modern language	Modern	greun	(generic) grain, cereal	m	Crops & fruit	CROPS	GRAIN (GENERIC)	74461		Inherited	No loan
74765	Breton	Indo-European	38200	Modern language	Modern	ed	(generic) grain, cereal; nourishment, food		Crops & fruit	CROPS	GRAIN (GENERIC)	74753		Inherited	No loan
74110	Breton	Indo-European	38200	Modern language	Modern	kerc'h	oats (collective)		Crops & fruit	CROPS	OATS	74065		Inherited	No loan
73897	Breton	Indo-European	38200	Modern language	Modern	segal	rye		Crops & fruit	CROPS	RYE	73888		Inherited	No loan
73277	Breton	Indo-European	38200	Modern language	Modern	niz	to winnow	v	Crops & fruit	CROPS	WHEAT	73257		Inherited	No loan
73276	Breton	Indo-European	38200	Modern language	Modern	gwiniz	wheat		Crops & fruit	CROPS	WHEAT	73257		Derivation	No loan
73526	Breton	Indo-European	38200	Modern language	Modern	bleuñv	flowers		Crops & fruit	CROPS	WHEAT	73459		Inherited	No loan
73647	Breton	Indo-European	38200	Modern language	Modern	bara	bread	m	Crops & fruit	CROPS	BARLEY	73606		Inherited	No loan
73833	Breton	Indo-European	38200	Modern language	Modern	heiz	barley (collective)		Crops & fruit	CROPS	BARLEY	73829		Inherited	No loan
61435	Breton	Indo-European	38200	Modern language	Modern	kazh	cat	m	Farm animals	DOMESTIC ANIMALS	CAT	61291		Inherited	No loan
26664	Breton	Indo-European	38200	Modern language	Modern	ki	dog	m	Farm animals	DOMESTIC ANIMALS	DOG	60954		Inherited	No loan
61654	Breton	Indo-European	38200	Modern language	Modern	gwenanenn	bee		Farm animals	DOMESTIC INSECTS	BEE	61648		Inherited	No loan
56120	Breton	Indo-European	38200	Modern language	Modern	ebeul	foal	m	Farm animals	DRAFT ANIMALS	HORSE	56092		Inherited	No loan
56287	Breton	Indo-European	38200	Modern language	Modern	marc'h	horse		Farm animals	DRAFT ANIMALS	HORSE	56266		Inherited	No loan
56638	Breton	Indo-European	38200	Modern language	Modern	caval	horse		Farm animals	DRAFT ANIMALS	HORSE	56627		Certainly borrowed	Loan	Latin
54927	Breton	Indo-European	38200	Modern language	Modern	ejenn	ox		Farm animals	DRAFT ANIMALS	OX	54925		Unspecified	No loan
55041	Breton	Indo-European	38200	Modern language	Modern	oc'hen	oxen	pl	Farm animals	DRAFT ANIMALS	OX	54932		Inherited	No loan
55191	Breton	Indo-European	38200	Modern language	Modern	dañvadez	ewe	f	Farm animals	DRAFT ANIMALS	OX	55146		Derivation	No loan
55186	Breton	Indo-European	38200	Modern language	Modern	dañvad	sheep (generic)	m	Farm animals	DRAFT ANIMALS	OX	55146		Inherited	No loan
69777	Breton	Indo-European	38200	Modern language	Modern	mez	mead	m	Products	DRINK AND DRUGS	MEAD	61738		Inherited	No loan
69608	Breton	Indo-European	38200	Modern language	Modern	gwin	wine		Products	DRINK AND DRUGS	WINE	69405		Inherited	No loan
66401	Breton	Indo-European	38200	Modern language	Modern	karw	deer	m	Wild animals	GAME ANIMALS	DEER	55066		Inherited	No loan
67414	Breton	Indo-European	38200	Modern language	Modern	yourc'h	roe deer	m	Wild animals	GAME ANIMALS	DEER	67396		Inherited	No loan
64579	Breton	Indo-European	38200	Modern language	Modern	skouarneg	hare	f	Wild animals	GAME ANIMALS	HARE	64569		Inherited	No loan
64590	Breton	Indo-European	38200	Modern language	Modern	gad	hare	f	Wild animals	GAME ANIMALS	HARE	64589		Inherited	No loan
64682	Breton	Indo-European	38200	Modern language	Modern	konikl	(wild) rabbit	m	Wild animals	GAME ANIMALS	RABBIT	64603		Inherited	No loan
64746	Breton	Indo-European	38200	Modern language	Modern	lapin	rabbit		Wild animals	GAME ANIMALS	RABBIT	64745		Certainly borrowed	Loan	French
62660	Breton	Indo-European	38200	Modern language	Modern	tourc'h-gouez	wild boar	m	Wild animals	GAME ANIMALS	WILD BOAR	62634		Unspecified	No loan
62655	Breton	Indo-European	38200	Modern language	Modern	tourc'h	boar	m	Wild animals	GAME ANIMALS	WILD BOAR	62634		Inherited	No loan
86808	Breton	Indo-European	38200	Modern language	Modern	skejañ	cut		Weapons etc.	IMPLEMENTS	KNIFE	86787		Inherited	No loan
86825	Breton	Indo-European	38200	Modern language	Modern	kontell	knife		Weapons etc.	IMPLEMENTS	KNIFE	86815		Inherited	No loan
78622	Breton	Indo-European	38200	Modern language	Modern	heskenn	saw		Cultural artefacts & tools	IMPLEMENTS	SAW	78620		Inherited	No loan
76536	Breton	Indo-European	38200	Modern language	Modern	falc'h	scythe		Cultural artefacts & tools	IMPLEMENTS	SCYTHE	91971		Inherited	No loan
77101	Breton	Indo-European	38200	Modern language	Modern	gwif	two-pronged fork		Cultural artefacts & tools	IMPLEMENTS	SICKLE	64563		Inherited	No loan
77096	Breton	Indo-European	38200	Modern language	Modern	gwez	trees (collective)		Cultural artefacts & tools	IMPLEMENTS	SICKLE	64563		Inherited	No loan
77422	Breton	Indo-European	38200	Modern language	Modern	pal	spade, shovel		Cultural artefacts & tools	IMPLEMENTS	SPADE	77405		Certainly borrowed	Loan	Latin
32780	Breton	Indo-European	38200	Modern language	Modern	kig	flesh, meat		Products	MATERIALS	MEAT	70434		Inherited	No loan
86150	Breton	Indo-European	38200	Modern language	Modern	pez	piece		Metals & materials	MATERIALS	LEATHER	86148		Unspecified	Loan
86335	Breton	Indo-European	38200	Modern language	Modern	ler	leather		Metals & materials	MATERIALS	LEATHER	86220		Inherited	No loan
68418	Breton	Indo-European	38200	Modern language	Modern	feur	fur; sheath		Products	MATERIALS	FUR	68354		Certainly borrowed	Loan	French
71059	Breton	Indo-European	38200	Modern language	Modern	amann, amannen	butter	m	Products	MATERIALS	GREASE	71038		Inherited	No loan
39020	Breton	Indo-European	38200	Modern language	Modern	maen	stone	m	Metals & materials	MATERIALS	STONE	81394		Inherited	No loan
85880	Breton	Indo-European	38200	Modern language	Modern	maen-hir	standing stone	m	Metals & materials	MATERIALS	STONE	81394		Derivation	No loan
85628	Breton	Indo-European	38200	Modern language	Modern	roc'h	rock	f	Metals & materials	MATERIALS	STONE	85606		Inherited	No loan
85811	Breton	Indo-European	38200	Modern language	Modern	kleger	heap of stones	m	Metals & materials	MATERIALS	STONE	85791		Inherited	No loan
85823	Breton	Indo-European	38200	Modern language	Modern	liac'h	stone		Metals & materials	MATERIALS	STONE	85815		Certainly borrowed	Loan	Old Irish
39021	Breton	Indo-European	38200	Modern language	Modern	karreg	rock, reef		Metals & materials	MATERIALS	STONE	85892		Inherited	No loan
77096	Breton	Indo-European	38200	Modern language	Modern	gwez	trees (collective)		Metals & materials	MATERIALS	WOOD	64563		Inherited	No loan
77101	Breton	Indo-European	38200	Modern language	Modern	gwif	two-pronged fork		Metals & materials	MATERIALS	WOOD	64563		Inherited	No loan
84860	Breton	Indo-European	38200	Modern language	Modern	koad	wood (forest); wood (material)	m	Metals & materials	MATERIALS	WOOD	84851		Inherited	No loan
39031	Breton	Indo-European	38200	Modern language	Modern	prenn	tree (not log); wood	m	Metals & materials	MATERIALS	WOOD	84882		Inherited	No loan
83513	Breton	Indo-European	38200	Modern language	Modern	kouevr	copper	m	Metals & materials	METALS	COPPER	83423		Certainly borrowed	Loan	French
83647	Breton	Indo-European	38200	Modern language	Modern	aram	bronze		Metals & materials	METALS	COPPER	83575		Certainly borrowed	Loan	Late Latin
84411	Breton	Indo-European	38200	Modern language	Modern	aour	gold	m	Metals & materials	METALS	GOLD	84398		Inherited	No loan
83881	Breton	Indo-European	38200	Modern language	Modern	houarn	iron	m	Metals & materials	METALS	IRON	83805		Inherited	No loan
84024	Breton	Indo-European	38200	Modern language	Modern	arc'hant	silver	m	Metals & materials	METALS	SILVER	83970		Inherited	No loan
58008	Breton	Indo-European	38200	Modern language	Modern	gwis	sow	f	Farm animals	PIG RAISING	PIG	57920		Inherited	No loan
59097	Breton	Indo-European	38200	Modern language	Modern	moc'h	pig		Farm animals	PIG RAISING	PIG	59083		Inherited	No loan
59132	Breton	Indo-European	38200	Modern language	Modern	houc'h	pig		Farm animals	PIG RAISING	PIG	59114		Inherited	No loan
59136	Breton	Indo-European	38200	Modern language	Modern	hoc'h-gouez	wild boar		Farm animals	PIG RAISING	PIG	59114		Unspecified	No loan
59830	Breton	Indo-European	38200	Modern language	Modern	banò, banw	piglet		Farm animals	PIG RAISING	PIGLET	59819		Inherited	No loan
60568	Breton	Indo-European	38200	Modern language	Modern	yar	hen; chicken (generic)	f	Farm animals	POULTRY	CHICKEN	60550		Inherited	No loan
60914	Breton	Indo-European	38200	Modern language	Modern	houad	duck		Farm animals	POULTRY	DUCK	60054		Inherited	No loan
60095	Breton	Indo-European	38200	Modern language	Modern	kilhog	rooster		Farm animals	POULTRY	ROOSTER	60076		Inherited	No loan
60307	Breton	Indo-European	38200	Modern language	Modern	kog	rooster		Farm animals	POULTRY	ROOSTER	60299		Certainly borrowed	Loan	French
62159	Breton	Indo-European	38200	Modern language	Modern	arzh	bear	m	Wild animals	PREDATOR ANIMALS	BEAR	62148		Inherited	No loan
63441	Breton	Indo-European	38200	Modern language	Modern	leon	lion		Wild animals	PREDATOR ANIMALS	LION	63330		Inherited	No loan
63569	Breton	Indo-European	38200	Modern language	Modern	lińs	lynx		Wild animals	PREDATOR ANIMALS	LYNX	63563		Inherited	No loan
65445	Breton	Indo-European	38200	Modern language	Modern	naer	snake	f	Wild animals	PREDATOR ANIMALS	SNAKE	65404		Inherited	No loan
62134	Breton	Indo-European	38200	Modern language	Modern	bleiz	wolf	m	Wild animals	PREDATOR ANIMALS	WOLF	62116		Inherited	No loan
64025	Breton	Indo-European	38200	Modern language	Modern	louarn, lowern	fox	m	Wild animals	PREDATOR ANIMALS	FOX	63896		Inherited	No loan
66113	Breton	Indo-European	38200	Modern language	Modern	erer	eagle	m	Wild animals	PREDATOR BIRDS	EAGLE	66001		Inherited	No loan
62800	Breton	Indo-European	38200	Modern language	Modern	kaouenn, kaouann	owl		Wild animals	PREDATOR BIRDS	OWL	62797		Inherited	No loan
62965	Breton	Indo-European	38200	Modern language	Modern	bonn	crane	m	Wild animals	PREDATOR BIRDS	OWL	62960		Inherited	No loan
65875	Breton	Indo-European	38200	Modern language	Modern	marc'hvran	raven		Wild animals	PREDATOR BIRDS	RAVEN	65777		Derivation	No loan
65870	Breton	Indo-European	38200	Modern language	Modern	bran vras	raven	f	Wild animals	PREDATOR BIRDS	RAVEN	65777		Derivation	No loan
65866	Breton	Indo-European	38200	Modern language	Modern	bran	crow	f	Wild animals	PREDATOR BIRDS	RAVEN	65777		Inherited	No loan
68733	Breton	Indo-European	38200	Modern language	Modern	mel	honey	m	Products	PRODUCTS	HONEY	61480		Inherited	No loan
69011	Breton	Indo-European	38200	Modern language	Modern	laezh	milk		Products	PRODUCTS	MILK	59858		Inherited	No loan
69255	Breton	Indo-European	38200	Modern language	Modern	holen	salt		Products	PRODUCTS	SALT	69138		Inherited	No loan
69259	Breton	Indo-European	38200	Modern language	Modern	hal	salty water, saline		Products	PRODUCTS	SALT	69138		Unspecified	No loan
70120	Breton	Indo-European	38200	Modern language	Modern	koar	wax		Products	PRODUCTS	WAX (BEES)	70059		Inherited	No loan
43884	Breton	Indo-European	38200	Modern language	Modern	gwlan	wool	m	Products	PRODUCTS	WOOL	67489		Inherited	No loan
83384	Breton	Indo-European	38200	Modern language	Modern	here	October (formerly autumn)		Seasons	SEASONS	AUTUMN	83382		Unspecified	No loan
83390	Breton	Indo-European	38200	Modern language	Modern	diskar-amzer	autumn (lit. fall-season, fall-time)		Seasons	SEASONS	AUTUMN	83389		Unspecified	No loan
82593	Breton	Indo-European	38200	Modern language	Modern	nevez-amzer	spring (lit. new time, new weather)		Seasons	SEASONS	SPRING	82592		Unspecified	No loan
82631	Breton	Indo-European	38200	Modern language	Modern	hañv	summer	m	Seasons	SEASONS	SUMMER	82665		Inherited	No loan
82636	Breton	Indo-European	38200	Modern language	Modern	Mezeven	June		Seasons	SEASONS	SUMMER	82665		Inherited	No loan
81942	Breton	Indo-European	38200	Modern language	Modern	goañv, gouañv	winter	m	Seasons	SEASONS	WINTER	81897		Inherited	No loan
58572	Breton	Indo-European	38200	Modern language	Modern	bouc'h	male goat		Farm animals	SMALL CATTLE	GOAT	58558		Inherited	No loan
58862	Breton	Indo-European	38200	Modern language	Modern	gaor, gavr	goat		Farm animals	SMALL CATTLE	GOAT	58789		Inherited	No loan
58281	Breton	Indo-European	38200	Modern language	Modern	oan	lamb	m	Farm animals	SMALL CATTLE	LAMB	58255		Inherited	No loan
58008	Breton	Indo-European	38200	Modern language	Modern	gwis	sow	f	Farm animals	SMALL CATTLE	RAM	57920		Inherited	No loan
58224	Breton	Indo-European	38200	Modern language	Modern	maout	ram	m	Farm animals	SMALL CATTLE	RAM	58211		Inherited	No loan
81416	Breton	Indo-European	38200	Modern language	Modern	ma	place		Cultural artefacts & tools	TILLAGE	CULTIVATED FIELD	81394		Inherited	No loan
81418	Breton	Indo-European	38200	Modern language	Modern	maes	plain; field for cultivation	m	Cultural artefacts & tools	TILLAGE	CULTIVATED FIELD	81394		Inherited	No loan
81732	Breton	Indo-European	38200	Modern language	Modern	ero, erv	furrow; ridge between furrows	m,f	Cultural artefacts & tools	TILLAGE	FURROW	72491		Inherited	No loan
81710	Breton	Indo-European	38200	Modern language	Modern	re	furrow (collective)		Cultural artefacts & tools	TILLAGE	FURROW	81609		Inherited	No loan
77876	Breton	Indo-European	38200	Modern language	Modern	arar	plow		Cultural artefacts & tools	TILLAGE	PLOW (N)	72491		Inherited	No loan
87982	Breton	Indo-European	38200	Modern language	Modern	saezh	arrow	f	Weapons etc.	WEAPONS	ARROW	87971		Inherited	No loan
79325	Breton	Indo-European	38200	Modern language	Modern	bouc'hal	axe		Cultural artefacts & tools	WEAPONS	AXE	79218		Inherited	No loan
87658	Breton	Indo-European	38200	Modern language	Modern	boug	tender	adj	Weapons etc.	WEAPONS	BOW	87653		Inherited	No loan
87830	Breton	Indo-European	38200	Modern language	Modern	gwar	bent, curved	adj	Weapons etc.	WEAPONS	BOW	87813		Inherited	No loan
87829	Breton	Indo-European	38200	Modern language	Modern	gwareg	bow	f	Weapons etc.	WEAPONS	BOW	87813		Derivation	No loan
87144	Breton	Indo-European	38200	Modern language	Modern	goa, goaf	spear		Weapons etc.	WEAPONS	SPEAR	87120		Inherited	No loan
88294	Breton	Indo-European	38200	Modern language	Modern	kleze	sword	m	Weapons etc.	WEAPONS	SWORD	88283		Inherited	No loan
75386	Breton	Indo-European	38200	Modern language	Modern	aval	apple		Crops & fruit	VEGETABLES & FRUIT	APPLE	75287		Inherited	No loan
76096	Breton	Indo-European	38200	Modern language	Modern	gwinienn	vine		Crops & fruit	VEGETABLES & FRUIT	GRAPE	69405		Inherited	No loan
75943	Breton	Indo-European	38200	Modern language	Modern	rezinenn	grape (singulative)		Crops & fruit	VEGETABLES & FRUIT	GRAPE	75933		Certainly borrowed	Loan	French
75948	Breton	Indo-European	38200	Modern language	Modern	rezin	bunch of grapes (coll.)		Crops & fruit	VEGETABLES & FRUIT	GRAPE	75933		Certainly borrowed	Loan	French
75146	Breton	Indo-European	38200	Modern language	Modern	irvin	turnip (collective)		Crops & fruit	VEGETABLES & FRUIT	TURNIP	75031		Inherited	No loan
75141	Breton	Indo-European	38200	Modern language	Modern	irvinenn	turnip (singulative)	m	Crops & fruit	VEGETABLES & FRUIT	TURNIP	75031		Inherited	No loan
80559	Breton	Indo-European	38200	Modern language	Modern	ahel	axle; axis		Cultural artefacts & tools	VEHICLES	AXLE	80380		Inherited	No loan
80731	Breton	Indo-European	38200	Modern language	Modern	gwerzid	spindle		Cultural artefacts & tools	VEHICLES	AXLE	80719		Inherited	No loan
79843	Breton	Indo-European	38200	Modern language	Modern	karr	wagon	m	Cultural artefacts & tools	VEHICLES	WAGON	78162		Inherited	No loan
80180	Breton	Indo-European	38200	Modern language	Modern	rod	wheel		Cultural artefacts & tools	VEHICLES	WHEEL	80116		Inherited	No loan
79521	Breton	Indo-European	38200	Modern language	Modern	yew	yoke	f	Cultural artefacts & tools	VEHICLES	YOKE	79367		Inherited	No loan
89914	Budukh	Nakh-Dagestanian	68450	Modern language	Modern	suzu	plow		Activities	ACTIVITIES	TO PLOW				No loan
89913	Budukh	Nakh-Dagestanian	68450	Modern language	Modern	šumlemi si'i	plow		Activities	ACTIVITIES	TO PLOW				Loan	Turkic (family)
89915	Budukh	Nakh-Dagestanian	68450	Modern language	Modern	servi	sew		Activities	ACTIVITIES	TO SEW				No loan
89916	Budukh	Nakh-Dagestanian	68450	Modern language	Modern	qerωi	sow		Activities	ACTIVITIES	TO SOW				No loan
89917	Budukh	Nakh-Dagestanian	68450	Modern language	Modern	čʰuxuc'u	spin (thread)		Activities	ACTIVITIES	TO SPIN (THREAD)				No loan
89918	Budukh	Nakh-Dagestanian	68450	Modern language	Modern	soxuru	weave		Activities	ACTIVITIES	TO WEAVE				No loan
89945	Budukh	Nakh-Dagestanian	68450	Modern language	Modern	ħani	bull		Farm animals	CATTLE	BULL	92024		Inherited	No loan
89947	Budukh	Nakh-Dagestanian	68450	Modern language	Modern	mal-qarɤ	cattle		Farm animals	CATTLE	CATTLE				Loan	Azerbaijani
89950	Budukh	Nakh-Dagestanian	68450	Modern language	Modern	zɤr	cow		Farm animals	CATTLE	COW				No loan
89935	Budukh	Nakh-Dagestanian	68450	Modern language	Modern	kʰɤnɤf	flax		Crops & fruit	CROPS	FLAX				No loan
89936	Budukh	Nakh-Dagestanian	68450	Modern language	Modern	tʰaxəl	grain (generic)		Crops & fruit	CROPS	GRAIN (GENERIC)				Loan	Azerbaijani
89937	Budukh	Nakh-Dagestanian	68450	Modern language	Modern	dan	grain (generic)		Crops & fruit	CROPS	GRAIN (GENERIC)				Loan	Azerbaijani
89939	Budukh	Nakh-Dagestanian	68450	Modern language	Modern	julaf	oats		Crops & fruit	CROPS	OATS				Loan	Azerbaijani
89940	Budukh	Nakh-Dagestanian	68450	Modern language	Modern	velemir	oats		Crops & fruit	CROPS	OATS				Loan	Azerbaijani
89941	Budukh	Nakh-Dagestanian	68450	Modern language	Modern	čʰovdar	rye		Crops & fruit	CROPS	RYE				Loan	Azerbaijani
89943	Budukh	Nakh-Dagestanian	68450	Modern language	Modern	qul	wheat		Crops & fruit	CROPS	WHEAT				No loan
89934	Budukh	Nakh-Dagestanian	68450	Modern language	Modern	mux	barley		Crops & fruit	CROPS	BARLEY	93273		Inherited	No loan
89946	Budukh	Nakh-Dagestanian	68450	Modern language	Modern	gɤčʰ	cat		Farm animals	DOMESTIC ANIMALS	CAT				Loan	Armenian
89951	Budukh	Nakh-Dagestanian	68450	Modern language	Modern	xor	dog		Farm animals	DOMESTIC ANIMALS	DOG				Loan	Persian
89944	Budukh	Nakh-Dagestanian	68450	Modern language	Modern	t'ut'	bee		Farm animals	DOMESTIC INSECTS	BEE				No loan
89952	Budukh	Nakh-Dagestanian	68450	Modern language	Modern	lem	donkey		Farm animals	DRAFT ANIMALS	DONKEY				No loan
89957	Budukh	Nakh-Dagestanian	68450	Modern language	Modern	xila	horse		Farm animals	DRAFT ANIMALS	HORSE				No loan
89959	Budukh	Nakh-Dagestanian	68450	Modern language	Modern	danɤ	ox		Farm animals	DRAFT ANIMALS	OX				Loan	Azerbaijani
89960	Budukh	Nakh-Dagestanian	68450	Modern language	Modern	k'orɤ	ox		Farm animals	DRAFT ANIMALS	OX	92094		Inherited	No loan
89985	Budukh	Nakh-Dagestanian	68450	Modern language	Modern	čʰaxər	wine		Products	DRINK AND DRUGS	WINE				Loan	Azerbaijani
90005	Budukh	Nakh-Dagestanian	68450	Modern language	Modern	qur	hare / rabbit		Wild animals	GAME ANIMALS	HARE	93475		Inherited	No loan
90005	Budukh	Nakh-Dagestanian	68450	Modern language	Modern	qur	hare / rabbit		Wild animals	GAME ANIMALS	RABBIT	93475		Inherited	No loan
90013	Budukh	Nakh-Dagestanian	68450	Modern language	Modern	vɤkʰ	wild pig		Wild animals	GAME ANIMALS	WILD BOAR				No loan
90014	Budukh	Nakh-Dagestanian	68450	Modern language	Modern	qabɤn	wild pig		Wild animals	GAME ANIMALS	WILD BOAR				Loan	?
89996	Budukh	Nakh-Dagestanian	68450	Modern language	Modern	k'ɤnt'	knife		Weapons etc.	IMPLEMENTS	KNIFE				No loan
89926	Budukh	Nakh-Dagestanian	68450	Modern language	Modern	mišer	saw		Cultural artefacts & tools	IMPLEMENTS	SAW				Loan	Azerbaijani
89927	Budukh	Nakh-Dagestanian	68450	Modern language	Modern	q'asu	scythe		Cultural artefacts & tools	IMPLEMENTS	SCYTHE				No loan
89928	Budukh	Nakh-Dagestanian	68450	Modern language	Modern	čʰin	sickle		Cultural artefacts & tools	IMPLEMENTS	SICKLE	92522		Inherited	No loan
89929	Budukh	Nakh-Dagestanian	68450	Modern language	Modern	lepʰitʰkʰe	spade		Cultural artefacts & tools	IMPLEMENTS	SPADE				Loan	Russian
89982	Budukh	Nakh-Dagestanian	68450	Modern language	Modern	jɤkʰ	meat		Products	MATERIALS	MEAT				No loan
89970	Budukh	Nakh-Dagestanian	68450	Modern language	Modern	ωičʰ	leather		Metals & materials	MATERIALS	LEATHER	93084		Inherited	No loan
89977	Budukh	Nakh-Dagestanian	68450	Modern language	Modern	ωičʰ	fur		Products	MATERIALS	FUR				No loan
89979	Budukh	Nakh-Dagestanian	68450	Modern language	Modern	ħarɤǯ	grease		Products	MATERIALS	GREASE				No loan
89978	Budukh	Nakh-Dagestanian	68450	Modern language	Modern	ma'	fat		Products	MATERIALS	GREASE	92825		Inherited	No loan
89972	Budukh	Nakh-Dagestanian	68450	Modern language	Modern	qaje	stone		Metals & materials	MATERIALS	STONE				Loan	Azerbaijani
89974	Budukh	Nakh-Dagestanian	68450	Modern language	Modern	k'əna	wood		Metals & materials	MATERIALS	WOOD				No loan
89973	Budukh	Nakh-Dagestanian	68450	Modern language	Modern	tʰaxtʰɤ	wood		Metals & materials	MATERIALS	WOOD				Loan	Azerbaijani
89967	Budukh	Nakh-Dagestanian	68450	Modern language	Modern	mis	copper		Metals & materials	METALS	COPPER				Loan	Azerbaijani
89968	Budukh	Nakh-Dagestanian	68450	Modern language	Modern	qəzəl	gold		Metals & materials	METALS	GOLD	94262	PT *Kɨ̄ŕ- 'red'	Certainly borrowed	Loan	Azerbaijani
89969	Budukh	Nakh-Dagestanian	68450	Modern language	Modern	demir	iron		Metals & materials	METALS	IRON				Loan	Azerbaijani
89971	Budukh	Nakh-Dagestanian	68450	Modern language	Modern	gümüš	silver		Metals & materials	METALS	SILVER				Loan	Azerbaijani
89961	Budukh	Nakh-Dagestanian	68450	Modern language	Modern	vɤkʰ	pig		Farm animals	PIG RAISING	PIG				No loan
89962	Budukh	Nakh-Dagestanian	68450	Modern language	Modern	vɤkʰəldo pʰɤtʰɤ	piglet		Farm animals	PIG RAISING	PIGLET				No loan
89949	Budukh	Nakh-Dagestanian	68450	Modern language	Modern	fere	chicken		Farm animals	POULTRY	CHICKEN				Loan	Azerbaijani
89948	Budukh	Nakh-Dagestanian	68450	Modern language	Modern	ǯibǯib	chicken		Farm animals	POULTRY	CHICKEN	92061		Inherited	No loan
89953	Budukh	Nakh-Dagestanian	68450	Modern language	Modern	urdeʁ	duck		Farm animals	POULTRY	DUCK				Loan	Azerbaijani
89956	Budukh	Nakh-Dagestanian	68450	Modern language	Modern	kʰəs	hen		Farm animals	POULTRY	HEN				No loan
89965	Budukh	Nakh-Dagestanian	68450	Modern language	Modern	kʰupʰɤl	rooster		Farm animals	POULTRY	ROOSTER				No loan
90001	Budukh	Nakh-Dagestanian	68450	Modern language	Modern	sor	bear		Wild animals	PREDATOR ANIMALS	BEAR				No loan
90006	Budukh	Nakh-Dagestanian	68450	Modern language	Modern	čaqqal	jackal		Wild animals	PREDATOR ANIMALS	JACKAL				Loan	Azerbaijani
90007	Budukh	Nakh-Dagestanian	68450	Modern language	Modern	bebir	leopard		Wild animals	PREDATOR ANIMALS	LEOPARD				Loan	Azerbaijani
90009	Budukh	Nakh-Dagestanian	68450	Modern language	Modern	aslan	lion		Wild animals	PREDATOR ANIMALS	LION				Loan	Azerbaijani
90008	Budukh	Nakh-Dagestanian	68450	Modern language	Modern	šir	lion		Wild animals	PREDATOR ANIMALS	LION				Loan	Azerbaijani
90012	Budukh	Nakh-Dagestanian	68450	Modern language	Modern	jer	snake		Wild animals	PREDATOR ANIMALS	SNAKE	93486		Inherited	No loan
90015	Budukh	Nakh-Dagestanian	68450	Modern language	Modern	æb, eb	wolf		Wild animals	PREDATOR ANIMALS	WOLF				No loan
90004	Budukh	Nakh-Dagestanian	68450	Modern language	Modern	sokʰul	fox		Wild animals	PREDATOR ANIMALS	FOX				No loan
90003	Budukh	Nakh-Dagestanian	68450	Modern language	Modern	quzʁun	eagle		Wild animals	PREDATOR BIRDS	EAGLE				Loan	Azerbaijani
90002	Budukh	Nakh-Dagestanian	68450	Modern language	Modern	qartʰal	eagle		Wild animals	PREDATOR BIRDS	EAGLE				Loan	Azerbaijani
90011	Budukh	Nakh-Dagestanian	68450	Modern language	Modern	č'aʁ	raven		Wild animals	PREDATOR BIRDS	RAVEN				No loan
90010	Budukh	Nakh-Dagestanian	68450	Modern language	Modern	qarʁa	raven		Wild animals	PREDATOR BIRDS	RAVEN				Loan	Azerbaijani
89980	Budukh	Nakh-Dagestanian	68450	Modern language	Modern	jitʰ	honey		Products	PRODUCTS	HONEY				No loan
89981	Budukh	Nakh-Dagestanian	68450	Modern language	Modern	hur	hops		Products	PRODUCTS	HOPS				No loan
89983	Budukh	Nakh-Dagestanian	68450	Modern language	Modern	jux	milk		Products	PRODUCTS	MILK				No loan
89984	Budukh	Nakh-Dagestanian	68450	Modern language	Modern	q'el	salt		Products	PRODUCTS	SALT				No loan
89976	Budukh	Nakh-Dagestanian	68450	Modern language	Modern	malax	beeswax		Products	PRODUCTS	WAX (BEES)				No loan
89975	Budukh	Nakh-Dagestanian	68450	Modern language	Modern	mum	beeswax		Products	PRODUCTS	WAX (BEES)				Loan	Azerbaijani
89986	Budukh	Nakh-Dagestanian	68450	Modern language	Modern	jiz	wool		Products	PRODUCTS	WOOL	92846		Inherited	No loan
89987	Budukh	Nakh-Dagestanian	68450	Modern language	Modern	kʰuz	autumn / harvest		Seasons	SEASONS	AUTUMN				Loan	Old Turkic
89987	Budukh	Nakh-Dagestanian	68450	Modern language	Modern	kʰuz	autumn / harvest		Seasons	SEASONS	HARVEST				Loan	Old Turkic
89988	Budukh	Nakh-Dagestanian	68450	Modern language	Modern	qarajaz	spring		Seasons	SEASONS	SPRING				Loan	Azerbaijani
89989	Budukh	Nakh-Dagestanian	68450	Modern language	Modern	χɤǯrɤǯ	summer		Seasons	SEASONS	SUMMER				No loan
89990	Budukh	Nakh-Dagestanian	68450	Modern language	Modern	q'aǯrɤǯ	winter		Seasons	SEASONS	WINTER				No loan
89954	Budukh	Nakh-Dagestanian	68450	Modern language	Modern	c'æω	goat		Farm animals	SMALL CATTLE	GOAT				No loan
89955	Budukh	Nakh-Dagestanian	68450	Modern language	Modern	tʰil	goat kid		Farm animals	SMALL CATTLE	GOAT				No loan
89958	Budukh	Nakh-Dagestanian	68450	Modern language	Modern	kʰel	lamb		Farm animals	SMALL CATTLE	LAMB				No loan
89964	Budukh	Nakh-Dagestanian	68450	Modern language	Modern	veq'er	ram		Farm animals	SMALL CATTLE	RAM				No loan
89963	Budukh	Nakh-Dagestanian	68450	Modern language	Modern	č'uvoɤl	ram		Farm animals	SMALL CATTLE	RAM				Loan	Turkic (family)
89966	Budukh	Nakh-Dagestanian	68450	Modern language	Modern	č'uvoɤl	sheep		Farm animals	SMALL CATTLE	SHEEP				Loan	Turkic (family)
89923	Budukh	Nakh-Dagestanian	68450	Modern language	Modern	nikʰ	cultivated field		Cultural artefacts & tools	TILLAGE	CULTIVATED FIELD	92511		Inherited	No loan
89925	Budukh	Nakh-Dagestanian	68450	Modern language	Modern	dinner	plow		Cultural artefacts & tools	TILLAGE	PLOW (N)				No loan
89992	Budukh	Nakh-Dagestanian	68450	Modern language	Modern	qušun	army		Weapons etc.	WEAPONS	ARMY				No loan
89991	Budukh	Nakh-Dagestanian	68450	Modern language	Modern	ordu	army		Weapons etc.	WEAPONS	ARMY				Loan	Azerbaijani
89993	Budukh	Nakh-Dagestanian	68450	Modern language	Modern	ux	arrow		Weapons etc.	WEAPONS	ARROW				Loan	Azerbaijani
89921	Budukh	Nakh-Dagestanian	68450	Modern language	Modern	naǯaʁ	axe		Cultural artefacts & tools	WEAPONS	AXE				No loan
89922	Budukh	Nakh-Dagestanian	68450	Modern language	Modern	jok'	axe		Cultural artefacts & tools	WEAPONS	AXE	92510		Derivation	No loan
89995	Budukh	Nakh-Dagestanian	68450	Modern language	Modern	jaj	bow		Weapons etc.	WEAPONS	BOW				Loan	Azerbaijani
89997	Budukh	Nakh-Dagestanian	68450	Modern language	Modern	qalxan	shield		Weapons etc.	WEAPONS	SHIELD				Loan	Azerbaijani
89999	Budukh	Nakh-Dagestanian	68450	Modern language	Modern	ǯida	spear		Weapons etc.	WEAPONS	SPEAR				No loan
89998	Budukh	Nakh-Dagestanian	68450	Modern language	Modern	šiškʰe	spear		Weapons etc.	WEAPONS	SPEAR				Loan	Circassian (branch)
90000	Budukh	Nakh-Dagestanian	68450	Modern language	Modern	qilinǯ	sword		Weapons etc.	WEAPONS	SWORD				Loan	Azerbaijani
89933	Budukh	Nakh-Dagestanian	68450	Modern language	Modern	ječʰ	apple		Crops & fruit	VEGETABLES & FRUIT	APPLE				No loan
89938	Budukh	Nakh-Dagestanian	68450	Modern language	Modern	juzum	grape		Crops & fruit	VEGETABLES & FRUIT	GRAPE				Loan	Azerbaijani
89942	Budukh	Nakh-Dagestanian	68450	Modern language	Modern	tʰurpʰ	turnip		Crops & fruit	VEGETABLES & FRUIT	TURNIP				Loan	Persian
89930	Budukh	Nakh-Dagestanian	68450	Modern language	Modern	ωarɤbɤ	wagon		Cultural artefacts & tools	VEHICLES	WAGON				Loan	Persian
89931	Budukh	Nakh-Dagestanian	68450	Modern language	Modern	čʰerx	wheel		Cultural artefacts & tools	VEHICLES	WHEEL				Loan	Azerbaijani
89932	Budukh	Nakh-Dagestanian	68450	Modern language	Modern	ukʰɤr	yoke		Cultural artefacts & tools	VEHICLES	YOKE				No loan
72622	Bulgarian	Indo-European	37300	Modern language	Modern	orá	to plow	v	Activities	ACTIVITIES	TO PLOW	72491		Inherited	No loan
72361	Bulgarian	Indo-European	37300	Modern language	Modern	šíja	to sew	v	Activities	ACTIVITIES	TO SEW	72231		Inherited	No loan
73033	Bulgarian	Indo-European	37300	Modern language	Modern	séja	to sow	v	Activities	ACTIVITIES	TO SOW	72831		Inherited	No loan
72190	Bulgarian	Indo-European	37300	Modern language	Modern	predá	to spin	v	Activities	ACTIVITIES	TO SPIN (THREAD)	72165		Inherited	No loan
71796	Bulgarian	Indo-European	37300	Modern language	Modern	pleta	to plait; to knit	v	Activities	ACTIVITIES	TO WEAVE	71719		Inherited	No loan
71819	Bulgarian	Indo-European	37300	Modern language	Modern	tắrgam	to tear, to pull	v	Activities	ACTIVITIES	TO WEAVE	71806		Inherited	No loan
	Bulgarian	Indo-European	37300		Modern	bik	bull	m	Farm animals	CATTLE	BULL				No loan
43486	Bulgarian	Indo-European	37300	Modern language	Modern	tur	aurochs	m	Farm animals	CATTLE	BULL	54195		Inherited	No loan
55860	Bulgarian	Indo-European	37300	Modern language	Modern	skot	cattle	m	Farm animals	CATTLE	CATTLE	55790		Inherited	No loan
56083	Bulgarian	Indo-European	37300	Modern language	Modern	bogát	rich	adj	Farm animals	CATTLE	CATTLE	56061		Inherited	No loan
54819	Bulgarian	Indo-European	37300	Modern language	Modern	govédo	head of cattle		Farm animals	CATTLE	COW	54635		Inherited	No loan
76421	Bulgarian	Indo-European	37300	Modern language	Modern	len	flax	m	Crops & fruit	CROPS	FLAX	76222		Inherited	No loan
74445	Bulgarian	Indo-European	37300	Modern language	Modern	žíto	(generic) grain, cereal		Crops & fruit	CROPS	GRAIN (GENERIC)	74389		Inherited	No loan
74601	Bulgarian	Indo-European	37300	Modern language	Modern	zắrno	(single) grain, bean, berry	n	Crops & fruit	CROPS	GRAIN (GENERIC)	74461		Inherited	No loan
75012	Bulgarian	Indo-European	37300	Modern language	Modern	xljab	bread, grain	m	Crops & fruit	CROPS	GRAIN (GENERIC)	74968		Inherited	No loan
74297	Bulgarian	Indo-European	37300	Modern language	Modern	ovés	oats	m	Crops & fruit	CROPS	OATS	74239		Inherited	No loan
74338	Bulgarian	Indo-European	37300	Modern language	Modern	zob	fodder (grain)	f	Crops & fruit	CROPS	OATS	74307		Inherited	No loan
73887	Bulgarian	Indo-European	37300	Modern language	Modern	brica	summer wheat		Crops & fruit	CROPS	RYE	73883		Unspecified	Loan
73987	Bulgarian	Indo-European	37300	Modern language	Modern	rǎž	rye	f	Crops & fruit	CROPS	RYE	73926		Inherited	No loan
73445	Bulgarian	Indo-European	37300	Modern language	Modern	pšeníca	wheat	f	Crops & fruit	CROPS	WHEAT	73404		Inherited	No loan
73677	Bulgarian	Indo-European	37300	Modern language	Modern	brašnó	flour	n	Crops & fruit	CROPS	BARLEY	73606		Inherited	No loan
61169	Bulgarian	Indo-European	37300	Modern language	Modern	kuče	dog	n	Farm animals	DOMESTIC ANIMALS	DOG	60954		Inherited	No loan
61631	Bulgarian	Indo-European	37300	Modern language	Modern	pčelá	bee	f	Farm animals	DOMESTIC INSECTS	BEE	61494		Inherited	No loan
57016	Bulgarian	Indo-European	37300	Modern language	Modern	magáre	donkey	n	Farm animals	DRAFT ANIMALS	DONKEY	56767		Certainly borrowed	Loan	Romanian
56456	Bulgarian	Indo-European	37300	Modern language	Modern	kon	horse (generic)	m	Farm animals	DRAFT ANIMALS	HORSE	56443		Inherited	No loan
56679	Bulgarian	Indo-European	37300	Modern language	Modern	kobíla	mare	f	Farm animals	DRAFT ANIMALS	HORSE	56627		Inherited	No loan
55081	Bulgarian	Indo-European	37300	Modern language	Modern	vol	ox	m	Farm animals	DRAFT ANIMALS	OX	55068		Inherited	No loan
69839	Bulgarian	Indo-European	37300	Modern language	Modern	med	honey	m	Products	DRINK AND DRUGS	MEAD	61738		Inherited	No loan
69647	Bulgarian	Indo-European	37300	Modern language	Modern	víno	wine	n	Products	DRINK AND DRUGS	WINE	69405		Inherited	No loan
64186	Bulgarian	Indo-European	37300	Modern language	Modern	zúbǎr	wisent, (European) bison	m	Wild animals	GAME ANIMALS	BISON	64168		Inherited	No loan
66507	Bulgarian	Indo-European	37300	Modern language	Modern	kráva	cow	f	Wild animals	GAME ANIMALS	DEER	55066		Inherited	No loan
66742	Bulgarian	Indo-European	37300	Modern language	Modern	sǎrná	roe deer	f	Wild animals	GAME ANIMALS	DEER	55066		Inherited	No loan
67135	Bulgarian	Indo-European	37300	Modern language	Modern	jelén	deer (generic)	m	Wild animals	GAME ANIMALS	DEER	58394		Inherited	No loan
67045	Bulgarian	Indo-European	37300	Modern language	Modern	álne	young chamois	f	Wild animals	GAME ANIMALS	DEER	58394		Inherited	No loan
64532	Bulgarian	Indo-European	37300	Modern language	Modern	záek	hare	m	Wild animals	GAME ANIMALS	HARE	64500		Inherited	No loan
64541	Bulgarian	Indo-European	37300	Modern language	Modern	div zaek	hare (possibly also rabbit)	m	Wild animals	GAME ANIMALS	HARE	64500		Derivation	No loan
64536	Bulgarian	Indo-European	37300	Modern language	Modern	domashen zaek	rabbit		Wild animals	GAME ANIMALS	HARE	64500		Derivation	No loan
62512	Bulgarian	Indo-European	37300	Modern language	Modern	díva svinjá	wild boar (generic)	f	Wild animals	GAME ANIMALS	WILD BOAR	59114		Derivation	No loan
62513	Bulgarian	Indo-European	37300	Modern language	Modern	svinjá	pig (generic); sow	f	Wild animals	GAME ANIMALS	WILD BOAR	59114		Inherited	No loan
62625	Bulgarian	Indo-European	37300	Modern language	Modern	gligan	wild boar; (male) wild boar	m	Wild animals	GAME ANIMALS	WILD BOAR	62623		Unspecified	No loan
86946	Bulgarian	Indo-European	37300	Modern language	Modern	nož	knife	m	Weapons etc.	IMPLEMENTS	KNIFE	86922		Inherited	No loan
78603	Bulgarian	Indo-European	37300	Modern language	Modern	pila	file		Cultural artefacts & tools	IMPLEMENTS	SAW	78530		Inherited	No loan
76816	Bulgarian	Indo-European	37300	Modern language	Modern	kosá	scythe	m	Cultural artefacts & tools	IMPLEMENTS	SCYTHE	76798		Inherited	No loan
76864	Bulgarian	Indo-European	37300	Modern language	Modern	sǎrp	sickle	m	Cultural artefacts & tools	IMPLEMENTS	SICKLE	76818		Inherited	No loan
76915	Bulgarian	Indo-European	37300	Modern language	Modern	dъ́rpam	scratch, tear		Cultural artefacts & tools	IMPLEMENTS	SICKLE	76902		Unspecified	No loan
77506	Bulgarian	Indo-European	37300	Modern language	Modern	lopáta	spade, shovel	f	Cultural artefacts & tools	IMPLEMENTS	SPADE	77485		Inherited	No loan
77595	Bulgarian	Indo-European	37300	Modern language	Modern	rov	ditch		Cultural artefacts & tools	IMPLEMENTS	SPADE	77513		Inherited	No loan
77591	Bulgarian	Indo-European	37300	Modern language	Modern	ríja	root, dig	v	Cultural artefacts & tools	IMPLEMENTS	SPADE	77513		Derivation	No loan
77586	Bulgarian	Indo-European	37300	Modern language	Modern	rílo	snout		Cultural artefacts & tools	IMPLEMENTS	SPADE	77513		Inherited	No loan
70193	Bulgarian	Indo-European	37300	Modern language	Modern	mesó	flesh, meat, (pl.) body	n	Products	MATERIALS	MEAT	70147		Inherited	No loan
70616	Bulgarian	Indo-European	37300	Modern language	Modern	krăv	blood	f	Products	MATERIALS	MEAT	70508		Inherited	No loan
86378	Bulgarian	Indo-European	37300	Modern language	Modern	kóža	skin, leather, rind	f	Metals & materials	MATERIALS	LEATHER	58674		Inherited	No loan
86207	Bulgarian	Indo-European	37300	Modern language	Modern	korá	bark, crust		Metals & materials	MATERIALS	LEATHER	86157		Inherited	No loan
86550	Bulgarian	Indo-European	37300	Modern language	Modern	pelená	bandage		Metals & materials	MATERIALS	LEATHER	86220		Inherited	No loan
67945	Bulgarian	Indo-European	37300	Modern language	Modern	guna	cloak of goatʼs hair		Products	MATERIALS	FUR	67922		Certainly borrowed	Loan	Modern Greek
68487	Bulgarian	Indo-European	37300	Modern language	Modern	blaná	manure (used as fuel), turf		Products	MATERIALS	FUR	68458		Inherited	No loan
70795	Bulgarian	Indo-European	37300	Modern language	Modern	mas	grease, fat	f	Products	MATERIALS	GREASE	70766		Inherited	No loan
71239	Bulgarian	Indo-European	37300	Modern language	Modern	loj	tallow	m	Products	MATERIALS	GREASE	71220		Inherited	No loan
85409	Bulgarian	Indo-European	37300	Modern language	Modern	gorá	forest		Metals & materials	MATERIALS	STONE	85377		Inherited	No loan
85469	Bulgarian	Indo-European	37300	Modern language	Modern	kámǎk	stone	m	Metals & materials	MATERIALS	STONE	85442		Inherited	No loan
85768	Bulgarian	Indo-European	37300	Modern language	Modern	stená	wall	f	Metals & materials	MATERIALS	STONE	85652		Inherited	No loan
84976	Bulgarian	Indo-European	37300	Modern language	Modern	meždá	balk		Metals & materials	MATERIALS	WOOD	84930		Inherited	No loan
85089	Bulgarian	Indo-European	37300	Modern language	Modern	kláda	pile, pyre		Metals & materials	MATERIALS	WOOD	84998		Inherited	No loan
85166	Bulgarian	Indo-European	37300	Modern language	Modern	derévo	tree, wood		Metals & materials	MATERIALS	WOOD	85098		Inherited	No loan
40439	Bulgarian	Indo-European	37300	Modern language	Modern	dərvó	tree (not log)		Metals & materials	MATERIALS	WOOD	85098		Unspecified	No loan
85170	Bulgarian	Indo-European	37300	Modern language	Modern	dŭrvesina	wood (material)	f	Metals & materials	MATERIALS	WOOD	85098		Unspecified	No loan
85373	Bulgarian	Indo-European	37300	Modern language	Modern	les	forest, wooded place	m	Metals & materials	MATERIALS	WOOD	85360		Inherited	No loan
69839	Bulgarian	Indo-European	37300	Modern language	Modern	med	honey	m	Metals & materials	METALS	COPPER	61738		Inherited	No loan
83712	Bulgarian	Indo-European	37300	Modern language	Modern	aranija	pot		Metals & materials	METALS	COPPER	83575		Certainly borrowed	Loan	Romanian
84371	Bulgarian	Indo-European	37300	Modern language	Modern	zláto	gold	n	Metals & materials	METALS	GOLD	84264		Inherited	No loan
83942	Bulgarian	Indo-European	37300	Modern language	Modern	željázo	iron	n	Metals & materials	METALS	IRON	83920		Inherited	No loan
84252	Bulgarian	Indo-European	37300	Modern language	Modern	srebró	silver	n	Metals & materials	METALS	SILVER	84151		Inherited	No loan
59416	Bulgarian	Indo-European	37300	Modern language	Modern	svinjá	pig (generic); sow	f	Farm animals	PIG RAISING	PIG	59114		Inherited	No loan
59571	Bulgarian	Indo-European	37300	Modern language	Modern	prasé	piglet, pig	n	Farm animals	PIG RAISING	PIG	59431		Inherited	No loan
60582	Bulgarian	Indo-European	37300	Modern language	Modern	pulka	pullet		Farm animals	POULTRY	CHICKEN	60580		Unspecified	Loan
60693	Bulgarian	Indo-European	37300	Modern language	Modern	járe	kid		Farm animals	POULTRY	CHICKEN	88501		Inherited	No loan
60627	Bulgarian	Indo-European	37300	Modern language	Modern	jarička	yearling		Farm animals	POULTRY	CHICKEN	88501		Inherited	No loan
60925	Bulgarian	Indo-European	37300	Modern language	Modern	rĕca	duck		Farm animals	POULTRY	DUCK	60919		Unspecified	No loan
60934	Bulgarian	Indo-European	37300	Modern language	Modern	píle	chicken	n	Farm animals	POULTRY	DUCK	60931		Unspecified	No loan
60340	Bulgarian	Indo-European	37300	Modern language	Modern	kokoš	cock, rooster	m	Farm animals	POULTRY	ROOSTER	60299		Inherited	No loan
60357	Bulgarian	Indo-European	37300	Modern language	Modern	kur	cock, rooster; penis	m	Farm animals	POULTRY	ROOSTER	60344		Inherited	No loan
60371	Bulgarian	Indo-European	37300	Modern language	Modern	petél	cock, rooster	m	Farm animals	POULTRY	ROOSTER	60364		Unspecified	No loan
62284	Bulgarian	Indo-European	37300	Modern language	Modern	méčka	bear (generic); female bear	f	Wild animals	PREDATOR ANIMALS	BEAR	61738		Inherited	No loan
	Bulgarian	Indo-European	37300		Modern	čakal	jackal		Wild animals	PREDATOR ANIMALS	JACKAL	64108			No loan
63514	Bulgarian	Indo-European	37300	Modern language	Modern	lǎv	lion	m	Wild animals	PREDATOR ANIMALS	LION	63330		Certainly borrowed	Loan	Old High German
63624	Bulgarian	Indo-European	37300	Modern language	Modern	ris	lynx	m	Wild animals	PREDATOR ANIMALS	LYNX	63563		Inherited	No loan
65197	Bulgarian	Indo-European	37300	Modern language	Modern	gad	animal, scoundrel, loathing		Wild animals	PREDATOR ANIMALS	SNAKE	65165		Inherited	No loan
65237	Bulgarian	Indo-European	37300	Modern language	Modern	zmej	dragon, tapeworm, (arch.) snake	m	Wild animals	PREDATOR ANIMALS	SNAKE	65207		Inherited	No loan
65234	Bulgarian	Indo-European	37300	Modern language	Modern	zmijá	snake; viper	f	Wild animals	PREDATOR ANIMALS	SNAKE	65207		Inherited	No loan
61974	Bulgarian	Indo-European	37300	Modern language	Modern	vălk	wolf	m	Wild animals	PREDATOR ANIMALS	WOLF	61774		Inherited	No loan
64066	Bulgarian	Indo-European	37300	Modern language	Modern	lísa	fox		Wild animals	PREDATOR ANIMALS	FOX	64061		Inherited	No loan
64093	Bulgarian	Indo-European	37300	Modern language	Modern	lisíca	fox	f	Wild animals	PREDATOR ANIMALS	FOX	64061		Inherited	No loan
66155	Bulgarian	Indo-European	37300	Modern language	Modern	orél	eagle	m	Wild animals	PREDATOR BIRDS	EAGLE	66001		Inherited	No loan
62834	Bulgarian	Indo-European	37300	Modern language	Modern	sóva	owl	f	Wild animals	PREDATOR BIRDS	OWL	62797		Inherited	No loan
65840	Bulgarian	Indo-European	37300	Modern language	Modern	gárvan	raven	m	Wild animals	PREDATOR BIRDS	RAVEN	65777		Inherited	No loan
65813	Bulgarian	Indo-European	37300	Modern language	Modern	vrána	crow	f	Wild animals	PREDATOR BIRDS	RAVEN	65777		Inherited	No loan
76147	Bulgarian	Indo-European	37300	Modern language	Modern	xmel	hops	f	Products	PRODUCTS	HOPS	76099		Inherited	No loan
68991	Bulgarian	Indo-European	37300	Modern language	Modern	mljáko	milk	n	Products	PRODUCTS	MILK	68837		Inherited	No loan
69348	Bulgarian	Indo-European	37300	Modern language	Modern	sol	salt	f	Products	PRODUCTS	SALT	69138		Inherited	No loan
70045	Bulgarian	Indo-European	37300	Modern language	Modern	vósăk	wax	m	Products	PRODUCTS	WAX (BEES)	69950		Inherited	No loan
67690	Bulgarian	Indo-European	37300	Modern language	Modern	vắlna	wool	f	Products	PRODUCTS	WOOL	67489		Inherited	No loan
67783	Bulgarian	Indo-European	37300	Modern language	Modern	járina	lambʼs wool		Products	PRODUCTS	WOOL	88501		Inherited	No loan
83350	Bulgarian	Indo-European	37300	Modern language	Modern	ésen	autumn	f	Seasons	SEASONS	AUTUMN	88502		Inherited	No loan
83099	Bulgarian	Indo-European	37300	Modern language	Modern	žắtva	harvest		Seasons	SEASONS	HARVEST	83072		Inherited	No loan
82267	Bulgarian	Indo-European	37300	Modern language	Modern	vesna	spring		Seasons	SEASONS	SPRING	82163		Inherited	No loan
82512	Bulgarian	Indo-European	37300	Modern language	Modern	prólet	spring	f	Seasons	SEASONS	SPRING	82505		Inherited	No loan
82267	Bulgarian	Indo-European	37300	Modern language	Modern	vesna	spring		Seasons	SEASONS	SUMMER	82163		Inherited	No loan
82830	Bulgarian	Indo-European	37300	Modern language	Modern	ljáto	summer, (obs.) year	n	Seasons	SEASONS	SUMMER	82505		Inherited	No loan
82146	Bulgarian	Indo-European	37300	Modern language	Modern	zíma	winter	f	Seasons	SEASONS	WINTER	81897		Inherited	No loan
58687	Bulgarian	Indo-European	37300	Modern language	Modern	kozá	goat	f	Farm animals	SMALL CATTLE	GOAT	58674		Inherited	No loan
58366	Bulgarian	Indo-European	37300	Modern language	Modern	ágne, jágne	lamb	n	Farm animals	SMALL CATTLE	LAMB	58255		Inherited	No loan
57823	Bulgarian	Indo-European	37300	Modern language	Modern	ovén	wether	m	Farm animals	SMALL CATTLE	RAM	57237		Inherited	No loan
57718	Bulgarian	Indo-European	37300	Modern language	Modern	brav	ram		Farm animals	SMALL CATTLE	SHEEP	55486		Inherited	No loan
57394	Bulgarian	Indo-European	37300	Modern language	Modern	ovcá	sheep (generic); ewe	f	Farm animals	SMALL CATTLE	SHEEP	57237		Inherited	No loan
57503	Bulgarian	Indo-European	37300	Modern language	Modern	mex	bellows, bag made from skin	m	Farm animals	SMALL CATTLE	SHEEP	57441		Inherited	No loan
57499	Bulgarian	Indo-European	37300	Modern language	Modern	mjax	bellows, bag made from skin		Farm animals	SMALL CATTLE	SHEEP	57441		Inherited	No loan
81376	Bulgarian	Indo-European	37300	Modern language	Modern	polé	plain, field	n	Cultural artefacts & tools	TILLAGE	CULTIVATED FIELD	81169		Inherited	No loan
81569	Bulgarian	Indo-European	37300	Modern language	Modern	níva	field, plowed field		Cultural artefacts & tools	TILLAGE	CULTIVATED FIELD	81550		Inherited	No loan
81815	Bulgarian	Indo-European	37300	Modern language	Modern	brazdá, brezdá	furrow	f	Cultural artefacts & tools	TILLAGE	FURROW	81799		Inherited	No loan
77962	Bulgarian	Indo-European	37300	Modern language	Modern	rálo	plow	n	Cultural artefacts & tools	TILLAGE	PLOW (N)	72491		Inherited	No loan
78114	Bulgarian	Indo-European	37300	Modern language	Modern	plug	plow	m	Cultural artefacts & tools	TILLAGE	PLOW (N)	72644		Inherited	No loan
78131	Bulgarian	Indo-European	37300	Modern language	Modern	émeš, émež, eméž, ímež	plowshare		Cultural artefacts & tools	TILLAGE	PLOW (N)	78122		Inherited	No loan
78152	Bulgarian	Indo-European	37300	Modern language	Modern	leméž	plowshare		Cultural artefacts & tools	TILLAGE	PLOW (N)	78133		Inherited	No loan
78258	Bulgarian	Indo-European	37300	Modern language	Modern	soxá	forked stick		Cultural artefacts & tools	TILLAGE	PLOW (N)	78202		Inherited	No loan
43638	Bulgarian	Indo-European	37300	Modern language	Modern	jásen; ósen	ash tree		Trees	TREES	ASH	43525		Inherited	No loan
43656	Bulgarian	Indo-European	37300	Modern language	Modern	brezá	birch	f	Trees	TREES	BIRCH	53958		Inherited	No loan
88144	Bulgarian	Indo-European	37300	Modern language	Modern	strela	arrow	f	Weapons etc.	WEAPONS	ARROW	88083		Certainly borrowed	Loan	Germanic (branch)
78885	Bulgarian	Indo-European	37300	Modern language	Modern	teslá	adze	f	Cultural artefacts & tools	WEAPONS	AXE	71546		Inherited	No loan
78939	Bulgarian	Indo-European	37300	Modern language	Modern	sekíca	axe	f	Cultural artefacts & tools	WEAPONS	AXE	78935		Inherited	No loan
79082	Bulgarian	Indo-European	37300	Modern language	Modern	topor	axe		Cultural artefacts & tools	WEAPONS	AXE	79059		Inherited	No loan
87883	Bulgarian	Indo-European	37300	Modern language	Modern	lăk	bow		Weapons etc.	WEAPONS	BOW	87864		Inherited	No loan
85166	Bulgarian	Indo-European	37300	Modern language	Modern	derévo	tree, wood		Weapons etc.	WEAPONS	SPEAR	85098		Inherited	No loan
87455	Bulgarian	Indo-European	37300	Modern language	Modern	kopája	to dig	v	Weapons etc.	WEAPONS	SPEAR	87393		Inherited	No loan
87450	Bulgarian	Indo-European	37300	Modern language	Modern	kópie	spear, lance	n	Weapons etc.	WEAPONS	SPEAR	87393		Inherited	No loan
87533	Bulgarian	Indo-European	37300	Modern language	Modern	kol	pole, stake		Weapons etc.	WEAPONS	SPEAR	87506		Inherited	No loan
88477	Bulgarian	Indo-European	37300	Modern language	Modern	meč	sword	m	Weapons etc.	WEAPONS	SWORD	88457		Inherited	No loan
75455	Bulgarian	Indo-European	37300	Modern language	Modern	jábol	apple	m	Crops & fruit	VEGETABLES & FRUIT	APPLE	75287		Inherited	No loan
75451	Bulgarian	Indo-European	37300	Modern language	Modern	jáblo	apple	n	Crops & fruit	VEGETABLES & FRUIT	APPLE	75287		Inherited	No loan
75459	Bulgarian	Indo-European	37300	Modern language	Modern	jábălka	apple, apple-tree	f	Crops & fruit	VEGETABLES & FRUIT	APPLE	75287		Inherited	No loan
75661	Bulgarian	Indo-European	37300	Modern language	Modern	íva	willow	f	Crops & fruit	VEGETABLES & FRUIT	GRAPE	75610		Inherited	No loan
76019	Bulgarian	Indo-European	37300	Modern language	Modern	jágoda	strawberry	f	Crops & fruit	VEGETABLES & FRUIT	GRAPE	75993		Inherited	No loan
76059	Bulgarian	Indo-European	37300	Modern language	Modern	grozd	grape		Crops & fruit	VEGETABLES & FRUIT	GRAPE	76045		Inherited	No loan
75132	Bulgarian	Indo-European	37300	Modern language	Modern	rjápa	turnip	f	Crops & fruit	VEGETABLES & FRUIT	TURNIP	75031		Inherited	No loan
80689	Bulgarian	Indo-European	37300	Modern language	Modern	ósa	axle	f	Cultural artefacts & tools	VEHICLES	AXLE	80380		Inherited	No loan
80980	Bulgarian	Indo-European	37300	Modern language	Modern	glavina	hub, nave		Cultural artefacts & tools	VEHICLES	HUB	80973		Inherited	No loan
80019	Bulgarian	Indo-European	37300	Modern language	Modern	koleló	wheel	n	Cultural artefacts & tools	VEHICLES	WHEEL	79981		Inherited	No loan
79567	Bulgarian	Indo-European	37300	Modern language	Modern	ígo	yoke		Cultural artefacts & tools	VEHICLES	YOKE	79367		Inherited	No loan
79616	Bulgarian	Indo-European	37300	Modern language	Modern	jarém	yoke	m,f	Cultural artefacts & tools	VEHICLES	YOKE	79598		Inherited	No loan
72784	Catalan	Indo-European	53200	Modern language	Modern	laborar	to work	v	Activities	ACTIVITIES	TO PLOW	72752		Inherited	No loan
72781	Catalan	Indo-European	53200	Modern language	Modern	llaurar	to plow	v	Activities	ACTIVITIES	TO PLOW	72752		Inherited	No loan
72430	Catalan	Indo-European	53200	Modern language	Modern	cosir	to sew	v	Activities	ACTIVITIES	TO SEW	72231		Inherited	No loan
72478	Catalan	Indo-European	53200	Modern language	Modern	costura	sewing	f	Activities	ACTIVITIES	TO SEW	72231		Inherited	No loan
72979	Catalan	Indo-European	53200	Modern language	Modern	sement	seed		Activities	ACTIVITIES	TO SOW	72831		Inherited	No loan
72972	Catalan	Indo-European	53200	Modern language	Modern	sembrar	to sow seed	v	Activities	ACTIVITIES	TO SOW	72831		Inherited	No loan
72977	Catalan	Indo-European	53200	Modern language	Modern	sahó	sowing		Activities	ACTIVITIES	TO SOW	72831		Inherited	No loan
72094	Catalan	Indo-European	53200	Modern language	Modern	fil	thread	m	Activities	ACTIVITIES	TO SPIN (THREAD)	72017		Inherited	No loan
72144	Catalan	Indo-European	53200	Modern language	Modern	torcer	to twist, to bend	v	Activities	ACTIVITIES	TO SPIN (THREAD)	72109		Inherited	No loan
71663	Catalan	Indo-European	53200	Modern language	Modern	tela	textile, cloth, woven material	f	Activities	ACTIVITIES	TO WEAVE	71546		Inherited	No loan
71595	Catalan	Indo-European	53200	Modern language	Modern	teixir	to weave	v	Activities	ACTIVITIES	TO WEAVE	71546		Inherited	No loan
54226	Catalan	Indo-European	53200	Modern language	Modern	toro	bull	m	Farm animals	CATTLE	BULL	54195		Inherited	No loan
54572	Catalan	Indo-European	53200	Modern language	Modern	parir	to give birth	v	Farm animals	CATTLE	BULL	54485		Inherited	No loan
56005	Catalan	Indo-European	53200	Modern language	Modern	guanyar	to gain, to profit	v	Farm animals	CATTLE	CATTLE	55909		Inherited	No loan
54762	Catalan	Indo-European	53200	Modern language	Modern	bou	ox	m	Farm animals	CATTLE	COW	54635		Inherited	No loan
76290	Catalan	Indo-European	53200	Modern language	Modern	lli	flax; linen	m	Crops & fruit	CROPS	FLAX	76222		Inherited	No loan
74719	Catalan	Indo-European	53200	Modern language	Modern	gra	grain, cereal	m	Crops & fruit	CROPS	GRAIN (GENERIC)	74461		Inherited	No loan
74270	Catalan	Indo-European	53200	Modern language	Modern	avena	oats	f	Crops & fruit	CROPS	OATS	74239		Inherited	No loan
73913	Catalan	Indo-European	53200	Modern language	Modern	sègol	rye	m	Crops & fruit	CROPS	RYE	73888		Inherited	No loan
73325	Catalan	Indo-European	53200	Modern language	Modern	trígol	wheat	m	Crops & fruit	CROPS	WHEAT	73315		Certainly borrowed	Loan	Spanish
73578	Catalan	Indo-European	53200	Modern language	Modern	blat	wheat (many varieties), cereal	m	Crops & fruit	CROPS	WHEAT	73459		Inherited	No loan
73798	Catalan	Indo-European	53200	Modern language	Modern	ordi	barley	m	Crops & fruit	CROPS	BARLEY	73746		Inherited	No loan
73874	Catalan	Indo-European	53200	Modern language	Modern	civada	oats	f	Crops & fruit	CROPS	BARLEY	73858		Inherited	No loan
61304	Catalan	Indo-European	53200	Modern language	Modern	gat, gata	cat	m,f	Farm animals	DOMESTIC ANIMALS	CAT	61291		Inherited	No loan
61024	Catalan	Indo-European	53200	Modern language	Modern	ca	dog; canid animal	m	Farm animals	DOMESTIC ANIMALS	DOG	60954		Inherited	No loan
61706	Catalan	Indo-European	53200	Modern language	Modern	abella	bee	f	Farm animals	DOMESTIC INSECTS	BEE	61678		Inherited	No loan
57166	Catalan	Indo-European	53200	Modern language	Modern	jument	donkey		Farm animals	DRAFT ANIMALS	DONKEY	56214		Inherited	No loan
56860	Catalan	Indo-European	53200	Modern language	Modern	ase	donkey	m	Farm animals	DRAFT ANIMALS	DONKEY	56767		Inherited	No loan
56175	Catalan	Indo-European	53200	Modern language	Modern	egua, euga	mare, female horse	f	Farm animals	DRAFT ANIMALS	HORSE	56092		Inherited	No loan
56659	Catalan	Indo-European	53200	Modern language	Modern	cavall	horse	m	Farm animals	DRAFT ANIMALS	HORSE	56627		Inherited	No loan
69453	Catalan	Indo-European	53200	Modern language	Modern	vi	wine	m	Products	DRINK AND DRUGS	WINE	69405		Inherited	No loan
66452	Catalan	Indo-European	53200	Modern language	Modern	cérvol	deer	m	Wild animals	GAME ANIMALS	DEER	55066		Inherited	No loan
66841	Catalan	Indo-European	53200	Modern language	Modern	bèstia	animal; beast of burden	f	Wild animals	GAME ANIMALS	DEER	66759		Inherited	No loan
64484	Catalan	Indo-European	53200	Modern language	Modern	llebre	hare	m	Wild animals	GAME ANIMALS	HARE	64457		Inherited	No loan
64714	Catalan	Indo-European	53200	Modern language	Modern	conill	rabbit	m	Wild animals	GAME ANIMALS	RABBIT	64603		Certainly borrowed	Loan	Vulgar Latin
62730	Catalan	Indo-European	53200	Modern language	Modern	senglar	wild boar	m	Wild animals	GAME ANIMALS	WILD BOAR	62712		Inherited	No loan
62734	Catalan	Indo-European	53200	Modern language	Modern	porc senglar	wild boar	m	Wild animals	GAME ANIMALS	WILD BOAR	62712		Unspecified	No loan
86652	Catalan	Indo-European	53200	Modern language	Modern	ganivet	knife	m	Weapons etc.	IMPLEMENTS	KNIFE	86564		Certainly borrowed	Loan	Old French
86651	Catalan	Indo-European	53200	Modern language	Modern	ganiveta	coulter (of a plow)	f	Weapons etc.	IMPLEMENTS	KNIFE	86564		Derivation	No loan
86880	Catalan	Indo-European	53200	Modern language	Modern	cotell, coltell	knife; coulter	m	Weapons etc.	IMPLEMENTS	KNIFE	86815		Inherited	No loan
78502	Catalan	Indo-European	53200	Modern language	Modern	serra	saw	f	Cultural artefacts & tools	IMPLEMENTS	SAW	76818		Inherited	No loan
43810	Catalan	Indo-European	53200	Modern language	Modern	dall, dalla	scythe		Cultural artefacts & tools	IMPLEMENTS	SCYTHE	76535		Inherited	No loan
43802	Catalan	Indo-European	53200	Modern language	Modern	falç, fals	sickle	f	Cultural artefacts & tools	IMPLEMENTS	SCYTHE	91971		Inherited	No loan
43802	Catalan	Indo-European	53200	Modern language	Modern	falç, fals	sickle	f	Cultural artefacts & tools	IMPLEMENTS	SICKLE	91971		Inherited	No loan
77459	Catalan	Indo-European	53200	Modern language	Modern	pala	spade, shovel	f	Cultural artefacts & tools	IMPLEMENTS	SPADE	77405		Inherited	No loan
77686	Catalan	Indo-European	53200	Modern language	Modern	rem	oar	m	Cultural artefacts & tools	IMPLEMENTS	SPADE	77626		Inherited	No loan
33188	Catalan	Indo-European	53200	Modern language	Modern	carn	meat/flesh; meat	f	Products	MATERIALS	MEAT	57775		Inherited	No loan
39454	Catalan	Indo-European	53200	Modern language	Modern	pell	skin (person's); skin; pelt	f	Metals & materials	MATERIALS	LEATHER	68211		Inherited	No loan
86175	Catalan	Indo-European	53200	Modern language	Modern	cuir	leather	m	Metals & materials	MATERIALS	LEATHER	86157		Inherited	No loan
68315	Catalan	Indo-European	53200	Modern language	Modern	pellissa	fur		Products	MATERIALS	FUR	68211		Inherited	No loan
68342	Catalan	Indo-European	53200	Modern language	Modern	pèl	hair	m	Products	MATERIALS	FUR	68324		Inherited	No loan
71117	Catalan	Indo-European	53200	Modern language	Modern	untar	to anoint, to smear	v	Products	MATERIALS	GREASE	71038		Inherited	No loan
27082	Catalan	Indo-European	53200	Modern language	Modern	greix	fat (organic substance); animal grease		Products	MATERIALS	GREASE	71144		Inherited	No loan
71188	Catalan	Indo-European	53200	Modern language	Modern	gras	fat	adj	Products	MATERIALS	GREASE	71144		Inherited	No loan
71326	Catalan	Indo-European	53200	Modern language	Modern	sèu	animal fat, tallow		Products	MATERIALS	GREASE	71299		Inherited	No loan
39460	Catalan	Indo-European	53200	Modern language	Modern	pedra	stone	f	Metals & materials	MATERIALS	STONE	85487		Inherited	No loan
85533	Catalan	Indo-European	53200	Modern language	Modern	llapis	pencil	m	Metals & materials	MATERIALS	STONE	85517		Inherited	No loan
39461	Catalan	Indo-European	53200	Modern language	Modern	roca	stone; rock	f	Metals & materials	MATERIALS	STONE	85606		Inherited	No loan
85647	Catalan	Indo-European	53200	Modern language	Modern	roca	rock, stone	m	Metals & materials	MATERIALS	STONE	85606		Derivation	No loan
84538	Catalan	Indo-European	53200	Modern language	Modern	lleny	ship		Metals & materials	MATERIALS	WOOD	84491		Inherited	No loan
84534	Catalan	Indo-European	53200	Modern language	Modern	llenya	firewood	f	Metals & materials	MATERIALS	WOOD	84491		Inherited	No loan
84570	Catalan	Indo-European	53200	Modern language	Modern	fust	wood (material)	m	Metals & materials	MATERIALS	WOOD	84545		Inherited	No loan
84567	Catalan	Indo-European	53200	Modern language	Modern	fusta	wood; wooden structure (of a house, a boat, etc)	f	Metals & materials	MATERIALS	WOOD	84545		Inherited	No loan
84652	Catalan	Indo-European	53200	Modern language	Modern	bosc	wood (material); wood (small forest)	m	Metals & materials	MATERIALS	WOOD	84584		Certainly borrowed	Loan	Germanic (branch)
83553	Catalan	Indo-European	53200	Modern language	Modern	coure	copper	m	Metals & materials	METALS	COPPER	83423		Inherited	No loan
83691	Catalan	Indo-European	53200	Modern language	Modern	aram	copper, bronze	m	Metals & materials	METALS	COPPER	83575		Inherited	No loan
84452	Catalan	Indo-European	53200	Modern language	Modern	or	gold	m	Metals & materials	METALS	GOLD	84398		Inherited	No loan
83915	Catalan	Indo-European	53200	Modern language	Modern	ferro, ferre	iron	m	Metals & materials	METALS	IRON	83898		Inherited	No loan
84120	Catalan	Indo-European	53200	Modern language	Modern	argent	silver	m	Metals & materials	METALS	SILVER	83970		Inherited	No loan
59532	Catalan	Indo-European	53200	Modern language	Modern	porc	pig; pork meat	m	Farm animals	PIG RAISING	PIG	59431		Inherited	No loan
60835	Catalan	Indo-European	53200	Modern language	Modern	ànec	duck	f	Farm animals	POULTRY	DUCK	60737		Inherited	No loan
59894	Catalan	Indo-European	53200	Modern language	Modern	gallina	hen	f	Farm animals	POULTRY	HEN	59875		Inherited	No loan
33185	Catalan	Indo-European	53200	Modern language	Modern	poll	louse (lice); pullet; (vulgar, slang) cock, dick	f	Farm animals	POULTRY	HEN	60000		Inherited	No loan
60035	Catalan	Indo-European	53200	Modern language	Modern	pollastre	chicken	m	Farm animals	POULTRY	HEN	60000		Unspecified	No loan
60247	Catalan	Indo-European	53200	Modern language	Modern	gall	cock, rooster	m	Farm animals	POULTRY	ROOSTER	59875		Inherited	No loan
27066	Catalan	Indo-European	53200	Modern language	Modern	os	bone; bear	m	Wild animals	PREDATOR ANIMALS	BEAR	62148		Inherited	No loan
63273	Catalan	Indo-European	53200	Modern language	Modern	pantera	kind of leopard	f	Wild animals	PREDATOR ANIMALS	LEOPARD	63192		Inherited	No loan
63479	Catalan	Indo-European	53200	Modern language	Modern	lleó	lion	m	Wild animals	PREDATOR ANIMALS	LION	63330		Inherited	No loan
63597	Catalan	Indo-European	53200	Modern language	Modern	linx	lynx	m	Wild animals	PREDATOR ANIMALS	LYNX	63563		Inherited	No loan
64843	Catalan	Indo-European	53200	Modern language	Modern	serp, serpent	snake	m	Wild animals	PREDATOR ANIMALS	SNAKE	64784		Inherited	No loan
64978	Catalan	Indo-European	53200	Modern language	Modern	anguila	eel	f	Wild animals	PREDATOR ANIMALS	SNAKE	64881		Inherited	No loan
65137	Catalan	Indo-European	53200	Modern language	Modern	verm	worm	m	Wild animals	PREDATOR ANIMALS	SNAKE	65005		Inherited	No loan
65322	Catalan	Indo-European	53200	Modern language	Modern	vibra	viper	f	Wild animals	PREDATOR ANIMALS	SNAKE	65244		Inherited	No loan
61924	Catalan	Indo-European	53200	Modern language	Modern	lloba	female wolf	f	Wild animals	PREDATOR ANIMALS	WOLF	61774		Unspecified	No loan
61920	Catalan	Indo-European	53200	Modern language	Modern	llop	wolf	m	Wild animals	PREDATOR ANIMALS	WOLF	61774		Inherited	No loan
63990	Catalan	Indo-European	53200	Modern language	Modern	volp	fox	m	Wild animals	PREDATOR ANIMALS	FOX	63896		Inherited	No loan
66215	Catalan	Indo-European	53200	Modern language	Modern	àguila	eagle	f	Wild animals	PREDATOR BIRDS	EAGLE	66186		Inherited	No loan
62983	Catalan	Indo-European	53200	Modern language	Modern	mussol	owl	m	Wild animals	PREDATOR BIRDS	OWL	62977		Unspecified	No loan
65724	Catalan	Indo-European	53200	Modern language	Modern	corb	raven	m	Wild animals	PREDATOR BIRDS	RAVEN	65630		Inherited	No loan
65657	Catalan	Indo-European	53200	Modern language	Modern	cornella	crow	f	Wild animals	PREDATOR BIRDS	RAVEN	65630		Inherited	No loan
68796	Catalan	Indo-European	53200	Modern language	Modern	mel	honey	m	Products	PRODUCTS	HONEY	61480		Inherited	No loan
76206	Catalan	Indo-European	53200	Modern language	Modern	llupol	hops; Humulus lupulus	m	Products	PRODUCTS	HOPS	61774		Inherited	No loan
69057	Catalan	Indo-European	53200	Modern language	Modern	llet	milk	f	Products	PRODUCTS	MILK	59858		Inherited	No loan
69303	Catalan	Indo-European	53200	Modern language	Modern	sal	salt	f	Products	PRODUCTS	SALT	69138		Inherited	No loan
70098	Catalan	Indo-European	53200	Modern language	Modern	ciri	candle	m	Products	PRODUCTS	WAX (BEES)	70059		Inherited	No loan
70096	Catalan	Indo-European	53200	Modern language	Modern	cera	wax	f	Products	PRODUCTS	WAX (BEES)	70059		Inherited	No loan
43856	Catalan	Indo-European	53200	Modern language	Modern	llana	wool	f	Products	PRODUCTS	WOOL	67489		Inherited	No loan
83319	Catalan	Indo-European	53200	Modern language	Modern	autumne	autumn (poetic)	m	Seasons	SEASONS	AUTUMN	83305		Inherited	No loan
83328	Catalan	Indo-European	53200	Modern language	Modern	tarda	afternoon	f	Seasons	SEASONS	AUTUMN	83326		Inherited	No loan
83327	Catalan	Indo-European	53200	Modern language	Modern	tardor	autumn	f	Seasons	SEASONS	AUTUMN	83326		Derivation	No loan
82333	Catalan	Indo-European	53200	Modern language	Modern	primavera	spring	f	Seasons	SEASONS	SPRING	82163		Inherited	No loan
82788	Catalan	Indo-European	53200	Modern language	Modern	estiu	summer	m	Seasons	SEASONS	SUMMER	82756		Inherited	No loan
82075	Catalan	Indo-European	53200	Modern language	Modern	hivern	winter	m	Seasons	SEASONS	WINTER	81897		Inherited	No loan
81976	Catalan	Indo-European	53200	Modern language	Modern	gebre	hoarfrost	m	Seasons	SEASONS	WINTER	81897		Certainly borrowed	Loan	Gaulish
58649	Catalan	Indo-European	53200	Modern language	Modern	boch	male goat	m	Farm animals	SMALL CATTLE	GOAT	58558		Certainly borrowed	Loan	Gaulish
58833	Catalan	Indo-European	53200	Modern language	Modern	cabra	goat	f	Farm animals	SMALL CATTLE	GOAT	58789		Inherited	No loan
58319	Catalan	Indo-European	53200	Modern language	Modern	anyell	lamb	m	Farm animals	SMALL CATTLE	LAMB	58255		Inherited	No loan
58491	Catalan	Indo-European	53200	Modern language	Modern	corder	lamb		Farm animals	SMALL CATTLE	LAMB	58484		Inherited	No loan
58511	Catalan	Indo-European	53200	Modern language	Modern	xai	lamb	m	Farm animals	SMALL CATTLE	LAMB	58510		Unspecified	No loan
58053	Catalan	Indo-European	53200	Modern language	Modern	vedell	calf	m,f	Farm animals	SMALL CATTLE	RAM	57920		Inherited	No loan
58248	Catalan	Indo-European	53200	Modern language	Modern	moltó	ram	m	Farm animals	SMALL CATTLE	RAM	58211		Inherited	No loan
57351	Catalan	Indo-European	53200	Modern language	Modern	ovella	sheep	f	Farm animals	SMALL CATTLE	SHEEP	57237		Inherited	No loan
81474	Catalan	Indo-European	53200	Modern language	Modern	camp	field for cultivation	m	Cultural artefacts & tools	TILLAGE	CULTIVATED FIELD	81452		Inherited	No loan
81781	Catalan	Indo-European	53200	Modern language	Modern	solc	furrow	m	Cultural artefacts & tools	TILLAGE	FURROW	77754		Inherited	No loan
81724	Catalan	Indo-European	53200	Modern language	Modern	porca	ridge between two furrows	f	Cultural artefacts & tools	TILLAGE	FURROW	81609		Inherited	No loan
77921	Catalan	Indo-European	53200	Modern language	Modern	arada	plow	f	Cultural artefacts & tools	TILLAGE	PLOW (N)	72491		Inherited	No loan
78189	Catalan	Indo-European	53200	Modern language	Modern	xaruga	iron plow	f	Cultural artefacts & tools	TILLAGE	PLOW (N)	78162		Certainly borrowed	Loan	French
43701	Catalan	Indo-European	53200	Modern language	Modern	freixe	ash tree	m	Trees	TREES	ASH	53958		Inherited	No loan
43504	Catalan	Indo-European	53200	Modern language	Modern	faig	beech	m	Trees	TREES	BEECH	43499		Inherited	No loan
43735	Catalan	Indo-European	53200	Modern language	Modern	bedoll	birch	m	Trees	TREES	BIRCH	43718		Inherited	No loan
88006	Catalan	Indo-European	53200	Modern language	Modern	sageta	arrow	f	Weapons etc.	WEAPONS	ARROW	87971		Inherited	No loan
88216	Catalan	Indo-European	53200	Modern language	Modern	fletxa	arrow	f	Weapons etc.	WEAPONS	ARROW	88166		Certainly borrowed	Loan	Old French
78771	Catalan	Indo-European	53200	Modern language	Modern	pica	pike	f	Cultural artefacts & tools	WEAPONS	AXE	78747		Certainly borrowed	Loan	Middle French
87921	Catalan	Indo-European	53200	Modern language	Modern	arc	bow, arc, arch	m	Weapons etc.	WEAPONS	BOW	87899		Inherited	No loan
87064	Catalan	Indo-European	53200	Modern language	Modern	llança	lance, spear	f	Weapons etc.	WEAPONS	SPEAR	87000		Inherited	No loan
88358	Catalan	Indo-European	53200	Modern language	Modern	espasa	sword	f	Weapons etc.	WEAPONS	SWORD	77155		Unspecified	No loan
75572	Catalan	Indo-European	53200	Modern language	Modern	poma	apple	f	Crops & fruit	VEGETABLES & FRUIT	APPLE	75521		Inherited	No loan
75576	Catalan	Indo-European	53200	Modern language	Modern	pom	fruit	m	Crops & fruit	VEGETABLES & FRUIT	APPLE	75521		Inherited	No loan
75930	Catalan	Indo-European	53200	Modern language	Modern	bagó	a single grape	m	Crops & fruit	VEGETABLES & FRUIT	GRAPE	75916		Inherited	No loan
75970	Catalan	Indo-European	53200	Modern language	Modern	raïm	grape (generic)	m	Crops & fruit	VEGETABLES & FRUIT	GRAPE	75933		Inherited	No loan
75232	Catalan	Indo-European	53200	Modern language	Modern	nap	turnip	m	Crops & fruit	VEGETABLES & FRUIT	TURNIP	75164		Inherited	No loan
80641	Catalan	Indo-European	53200	Modern language	Modern	eix	axis, axle	m	Cultural artefacts & tools	VEHICLES	AXLE	80380		Inherited	No loan
80941	Catalan	Indo-European	53200	Modern language	Modern	boixa	hub, nave	f	Cultural artefacts & tools	VEHICLES	HUB	80895		Inherited	No loan
79934	Catalan	Indo-European	53200	Modern language	Modern	carrera	path, way, road	f	Cultural artefacts & tools	VEHICLES	WAGON	78162		Inherited	No loan
80282	Catalan	Indo-European	53200	Modern language	Modern	roda	wheel	f	Cultural artefacts & tools	VEHICLES	WHEEL	80116		Inherited	No loan
79399	Catalan	Indo-European	53200	Modern language	Modern	jou	yoke	m	Cultural artefacts & tools	VEHICLES	YOKE	79367		Inherited	No loan
681	Chechen	Nakh-Dagestanian	57850	Modern language	Modern	axa	plow		Activities	ACTIVITIES	TO PLOW				No loan
680	Chechen	Nakh-Dagestanian	57850	Modern language	Modern	tʰĭega	sew		Activities	ACTIVITIES	TO SEW				No loan
682	Chechen	Nakh-Dagestanian	57850	Modern language	Modern	den	sow		Activities	ACTIVITIES	TO SOW				No loan
679	Chechen	Nakh-Dagestanian	57850	Modern language	Modern	ħowza	spin (thread)		Activities	ACTIVITIES	TO SPIN (THREAD)				No loan
678	Chechen	Nakh-Dagestanian	57850	Modern language	Modern	ducʰa, dŭoza	weave		Activities	ACTIVITIES	TO WEAVE				No loan
637	Chechen	Nakh-Dagestanian	57850	Modern language	Modern	stʰu	bull		Farm animals	CATTLE	BULL				No loan
640	Chechen	Nakh-Dagestanian	57850	Modern language	Modern	ħajbanaš	cattle		Farm animals	CATTLE	CATTLE				No loan
54135	Chechen	Nakh-Dagestanian	57850	Modern language	Modern	dæxnij	cattle		Farm animals	CATTLE	CATTLE				No loan
638	Chechen	Nakh-Dagestanian	57850	Modern language	Modern	jetʰ:	cow		Farm animals	CATTLE	COW				No loan
92028	Chechen	Nakh-Dagestanian	57850	Modern language	Modern	ħel-i:, ħe:li:	cow		Farm animals	CATTLE	COW	92024		Inherited	No loan
654	Chechen	Nakh-Dagestanian	57850	Modern language	Modern	cʰicʰig	cat		Farm animals	DOMESTIC ANIMALS	CAT	92055		Inherited	No loan
653	Chechen	Nakh-Dagestanian	57850	Modern language	Modern	žωæla	dog		Farm animals	DOMESTIC ANIMALS	DOG				No loan
655	Chechen	Nakh-Dagestanian	57850	Modern language	Modern	naqarmŭoza	bee		Farm animals	DOMESTIC INSECTS	BEE				No loan
642	Chechen	Nakh-Dagestanian	57850	Modern language	Modern	vir	donkey		Farm animals	DRAFT ANIMALS	DONKEY				No loan
641	Chechen	Nakh-Dagestanian	57850	Modern language	Modern	gowr	horse		Farm animals	DRAFT ANIMALS	HORSE				No loan
639	Chechen	Nakh-Dagestanian	57850	Modern language	Modern	gŭomaš-buɣa	ox		Farm animals	DRAFT ANIMALS	OX				No loan
673	Chechen	Nakh-Dagestanian	57850	Modern language	Modern	čʰaɣar	wine		Products	DRINK AND DRUGS	WINE				No loan
663	Chechen	Nakh-Dagestanian	57850	Modern language	Modern	bizon	bison		Wild animals	GAME ANIMALS	BISON				No loan
664	Chechen	Nakh-Dagestanian	57850	Modern language	Modern	pʰħagal	hare / rabbit		Wild animals	GAME ANIMALS	HARE	93475		Derivation	No loan
664	Chechen	Nakh-Dagestanian	57850	Modern language	Modern	pʰħagal	hare / rabbit		Wild animals	GAME ANIMALS	RABBIT	93475		Derivation	No loan
658	Chechen	Nakh-Dagestanian	57850	Modern language	Modern	nal	wild pig		Wild animals	GAME ANIMALS	WILD BOAR	93477		Inherited	No loan
710	Chechen	Nakh-Dagestanian	57850	Modern language	Modern	urs	knife		Weapons etc.	IMPLEMENTS	KNIFE				No loan
687	Chechen	Nakh-Dagestanian	57850	Modern language	Modern	xjerx	saw		Cultural artefacts & tools	IMPLEMENTS	SAW				No loan
683	Chechen	Nakh-Dagestanian	57850	Modern language	Modern	mangal	scythe		Cultural artefacts & tools	IMPLEMENTS	SCYTHE				No loan
684	Chechen	Nakh-Dagestanian	57850	Modern language	Modern	mars	sickle		Cultural artefacts & tools	IMPLEMENTS	SICKLE	92525		Inherited	No loan
685	Chechen	Nakh-Dagestanian	57850	Modern language	Modern	bjel	spade		Cultural artefacts & tools	IMPLEMENTS	SPADE				No loan
676	Chechen	Nakh-Dagestanian	57850	Modern language	Modern	žižig	meat		Products	MATERIALS	MEAT	92838		Inherited	No loan
705	Chechen	Nakh-Dagestanian	57850	Modern language	Modern	neˤ	leather		Metals & materials	MATERIALS	LEATHER				No loan
669	Chechen	Nakh-Dagestanian	57850	Modern language	Modern	t'arɣa	fur		Products	MATERIALS	FUR				No loan
677	Chechen	Nakh-Dagestanian	57850	Modern language	Modern	dætʰ:a	grease		Products	MATERIALS	GREASE				No loan
704	Chechen	Nakh-Dagestanian	57850	Modern language	Modern	t'ulg	stone		Metals & materials	MATERIALS	STONE				No loan
703	Chechen	Nakh-Dagestanian	57850	Modern language	Modern	dečʰig	wood		Metals & materials	MATERIALS	WOOD				No loan
699	Chechen	Nakh-Dagestanian	57850	Modern language	Modern	c'astʰa	copper		Metals & materials	METALS	COPPER				No loan
702	Chechen	Nakh-Dagestanian	57850	Modern language	Modern	deši:	gold		Metals & materials	METALS	GOLD	93096		Inherited	No loan
700	Chechen	Nakh-Dagestanian	57850	Modern language	Modern	ečʰig	iron		Metals & materials	METALS	IRON				No loan
701	Chechen	Nakh-Dagestanian	57850	Modern language	Modern	detʰi:	silver		Metals & materials	METALS	SILVER	93086		Inherited	No loan
647	Chechen	Nakh-Dagestanian	57850	Modern language	Modern	ħaqa	pig		Farm animals	PIG RAISING	PIG	92100		Inherited	No loan
648	Chechen	Nakh-Dagestanian	57850	Modern language	Modern	xersi, xürsik	piglet		Farm animals	PIG RAISING	PIGLET				No loan
651	Chechen	Nakh-Dagestanian	57850	Modern language	Modern	k'ŭorni	chicken		Farm animals	POULTRY	CHICKEN				No loan
54136	Chechen	Nakh-Dagestanian	57850	Modern language	Modern	kʰotʰaman k'ŭorni	chicken		Farm animals	POULTRY	CHICKEN	92087		Derivation	No loan
652	Chechen	Nakh-Dagestanian	57850	Modern language	Modern	bad, ba:d	duck		Farm animals	POULTRY	DUCK	92077		Inherited	No loan
649	Chechen	Nakh-Dagestanian	57850	Modern language	Modern	kŭotʰam	hen		Farm animals	POULTRY	HEN	92087		Inherited	No loan
650	Chechen	Nakh-Dagestanian	57850	Modern language	Modern	borɣal	rooster		Farm animals	POULTRY	ROOSTER				No loan
54133	Chechen	Nakh-Dagestanian	57850	Modern language	Modern	nωæna	rooster		Farm animals	POULTRY	ROOSTER				No loan
657	Chechen	Nakh-Dagestanian	57850	Modern language	Modern	čʰa	bear		Wild animals	PREDATOR ANIMALS	BEAR	93473		Inherited	No loan
662	Chechen	Nakh-Dagestanian	57850	Modern language	Modern	čʰaɣalq	jackal		Wild animals	PREDATOR ANIMALS	JACKAL				No loan
659	Chechen	Nakh-Dagestanian	57850	Modern language	Modern	c'öq'alŭom	leopard		Wild animals	PREDATOR ANIMALS	LEOPARD	92070		Derivation	No loan
660	Chechen	Nakh-Dagestanian	57850	Modern language	Modern	lŭom	lion		Wild animals	PREDATOR ANIMALS	LION				No loan
54118	Chechen	Nakh-Dagestanian	57850	Modern language	Modern	tʰĭeqarg	snake		Wild animals	PREDATOR ANIMALS	SNAKE				No loan
665	Chechen	Nakh-Dagestanian	57850	Modern language	Modern	læħa	snake		Wild animals	PREDATOR ANIMALS	SNAKE				No loan
656	Chechen	Nakh-Dagestanian	57850	Modern language	Modern	bŭorz	wolf		Wild animals	PREDATOR ANIMALS	WOLF	93480		Inherited	No loan
661	Chechen	Nakh-Dagestanian	57850	Modern language	Modern	cʰħogal	fox		Wild animals	PREDATOR ANIMALS	FOX	93484		Inherited	No loan
667	Chechen	Nakh-Dagestanian	57850	Modern language	Modern	ærzu	eagle		Wild animals	PREDATOR BIRDS	EAGLE	93490		Inherited	No loan
666	Chechen	Nakh-Dagestanian	57850	Modern language	Modern	q'ig	raven		Wild animals	PREDATOR BIRDS	RAVEN				No loan
670	Chechen	Nakh-Dagestanian	57850	Modern language	Modern	mŭoz	honey		Products	PRODUCTS	HONEY	92833		Inherited	No loan
674	Chechen	Nakh-Dagestanian	57850	Modern language	Modern	xojaxar	hops		Products	PRODUCTS	HOPS				No loan
671	Chechen	Nakh-Dagestanian	57850	Modern language	Modern	šura	milk		Products	PRODUCTS	MILK	92840		Inherited	No loan
672	Chechen	Nakh-Dagestanian	57850	Modern language	Modern	tʰüxa	salt		Products	PRODUCTS	SALT				No loan
675	Chechen	Nakh-Dagestanian	57850	Modern language	Modern	(naqarmozijn) balŭoz	beeswax		Products	PRODUCTS	WAX (BEES)				No loan
668	Chechen	Nakh-Dagestanian	57850	Modern language	Modern	exang	wool		Products	PRODUCTS	WOOL				No loan
696	Chechen	Nakh-Dagestanian	57850	Modern language	Modern	güjre	autumn / harvest		Seasons	SEASONS	AUTUMN				No loan
696	Chechen	Nakh-Dagestanian	57850	Modern language	Modern	güjre	autumn / harvest		Seasons	SEASONS	HARVEST				No loan
698	Chechen	Nakh-Dagestanian	57850	Modern language	Modern	bωæstʰje	spring		Seasons	SEASONS	SPRING	93802		Unspecified	No loan
695	Chechen	Nakh-Dagestanian	57850	Modern language	Modern	æxkʰe	summer		Seasons	SEASONS	SUMMER				No loan
697	Chechen	Nakh-Dagestanian	57850	Modern language	Modern	ˤa	winter		Seasons	SEASONS	WINTER	93808		Inherited	No loan
54134	Chechen	Nakh-Dagestanian	57850	Modern language	Modern	gaza	goat (female)		Farm animals	SMALL CATTLE	GOAT				No loan
646	Chechen	Nakh-Dagestanian	57850	Modern language	Modern	bŭož	goat (male)		Farm animals	SMALL CATTLE	GOAT	92082		Inherited	No loan
645	Chechen	Nakh-Dagestanian	57850	Modern language	Modern	a:xar	lamb		Farm animals	SMALL CATTLE	LAMB	92107		Inherited	No loan
644	Chechen	Nakh-Dagestanian	57850	Modern language	Modern	ˤüzg	ram		Farm animals	SMALL CATTLE	RAM				No loan
643	Chechen	Nakh-Dagestanian	57850	Modern language	Modern	üstʰaɣ	sheep, ram		Farm animals	SMALL CATTLE	RAM				No loan
643	Chechen	Nakh-Dagestanian	57850	Modern language	Modern	üstʰaɣ	sheep, ram		Farm animals	SMALL CATTLE	SHEEP				No loan
692	Chechen	Nakh-Dagestanian	57850	Modern language	Modern	qa:	cultivated field		Cultural artefacts & tools	TILLAGE	CULTIVATED FIELD	92512		Inherited	No loan
686	Chechen	Nakh-Dagestanian	57850	Modern language	Modern	nŭox	plow		Cultural artefacts & tools	TILLAGE	PLOW (N)				No loan
54138	Chechen	Nakh-Dagestanian	57850	Modern language	Modern	armi	army		Weapons etc.	WEAPONS	ARMY				No loan
712	Chechen	Nakh-Dagestanian	57850	Modern language	Modern	surx	army		Weapons etc.	WEAPONS	ARMY				No loan
54137	Chechen	Nakh-Dagestanian	57850	Modern language	Modern	eskʰar	army		Weapons etc.	WEAPONS	ARMY				No loan
708	Chechen	Nakh-Dagestanian	57850	Modern language	Modern	pʰxa	arrow		Weapons etc.	WEAPONS	ARROW	93633		Inherited	No loan
688	Chechen	Nakh-Dagestanian	57850	Modern language	Modern	dig	axe		Cultural artefacts & tools	WEAPONS	AXE	92510		Inherited	No loan
707	Chechen	Nakh-Dagestanian	57850	Modern language	Modern	ˤad	bow		Weapons etc.	WEAPONS	BOW				No loan
711	Chechen	Nakh-Dagestanian	57850	Modern language	Modern	tʰurs	shield		Weapons etc.	WEAPONS	SHIELD	93892		Inherited	No loan
706	Chechen	Nakh-Dagestanian	57850	Modern language	Modern	gömruq'	spear		Weapons etc.	WEAPONS	SPEAR				No loan
709	Chechen	Nakh-Dagestanian	57850	Modern language	Modern	ɣa:laq	sword		Weapons etc.	WEAPONS	SWORD				No loan
690	Chechen	Nakh-Dagestanian	57850	Modern language	Modern	vordan	wagon		Cultural artefacts & tools	VEHICLES	WAGON				No loan
691	Chechen	Nakh-Dagestanian	57850	Modern language	Modern	čʰarx, č'urg	wheel		Cultural artefacts & tools	VEHICLES	WHEEL				No loan
689	Chechen	Nakh-Dagestanian	57850	Modern language	Modern	duq'	yoke		Cultural artefacts & tools	VEHICLES	YOKE				No loan
71430	Classical Armenian	Indo-European	36000	Dead (well documented)	Medieval	hiwsem	to weave, plait	v	Activities	ACTIVITIES	TO WEAVE	71428		Unspecified	No loan
55569	Classical Armenian	Indo-European	36000	Dead (well documented)	Medieval	mal	property, possession; cattle		Farm animals	CATTLE	CATTLE	55567		Certainly borrowed	Loan	Standard Arabic
55769	Classical Armenian	Indo-European	36000	Dead (well documented)	Medieval	asr	fleece, wool		Farm animals	CATTLE	CATTLE	55696		Inherited	No loan
54910	Classical Armenian	Indo-European	36000	Dead (well documented)	Medieval	ezn	bullock; ox		Farm animals	CATTLE	COW	54890		Inherited	No loan
74885	Classical Armenian	Indo-European	36000	Dead (well documented)	Medieval	hat	grain		Crops & fruit	CROPS	GRAIN (GENERIC)	74872		Inherited	No loan
74356	Classical Armenian	Indo-European	36000	Dead (well documented)	Medieval	varsak	oat		Crops & fruit	CROPS	OATS	74354		Unspecified	No loan
74041	Classical Armenian	Indo-European	36000	Dead (well documented)	Medieval	tari	year		Crops & fruit	CROPS	RYE	74038		Unspecified	No loan
74040	Classical Armenian	Indo-European	36000	Dead (well documented)	Medieval	tarekan	year, (adj.) annual		Crops & fruit	CROPS	RYE	74038		Derivation	No loan
73402	Classical Armenian	Indo-European	36000	Dead (well documented)	Medieval	c'orean	wheat		Crops & fruit	CROPS	WHEAT	73400		Unspecified	No loan
56253	Classical Armenian	Indo-European	36000	Dead (well documented)	Medieval	ji	horse		Farm animals	DRAFT ANIMALS	HORSE	56251		Inherited	No loan
69924	Classical Armenian	Indo-European	36000	Dead (well documented)	Medieval	awɫi	a strong fermented drink, intoxicating beverage		Products	DRINK AND DRUGS	MEAD	69907		Inherited	No loan
67097	Classical Armenian	Indo-European	36000	Dead (well documented)	Medieval	ełn	deer		Wild animals	GAME ANIMALS	DEER	58394		Inherited	No loan
67021	Classical Armenian	Indo-European	36000	Dead (well documented)	Medieval	analut'	a kind of deer, hind; probably fallow deer		Wild animals	GAME ANIMALS	DEER	58394		Inherited	No loan
56253	Classical Armenian	Indo-European	36000	Dead (well documented)	Medieval	ji	horse		Wild animals	GAME ANIMALS	HARE	56251		Inherited	No loan
64598	Classical Armenian	Indo-European	36000	Dead (well documented)	Medieval	čagar	rabbit		Wild animals	GAME ANIMALS	RABBIT	64596		Unspecified	Loan
62519	Classical Armenian	Indo-European	36000	Dead (well documented)	Medieval	varaz	boar		Wild animals	GAME ANIMALS	WILD BOAR	55089		Certainly borrowed	Loan	Middle Persian
76796	Classical Armenian	Indo-European	36000	Dead (well documented)	Medieval	gerandi	-		Cultural artefacts & tools	IMPLEMENTS	SCYTHE	76794		Inherited	No loan
33719	Classical Armenian	Indo-European	36000	Dead (well documented)	Medieval	mis	meat/flesh; flesh, meat		Products	MATERIALS	MEAT	70147		Inherited	No loan
85939	Classical Armenian	Indo-European	36000	Dead (well documented)	Medieval	k'ar	stone, rock		Metals & materials	MATERIALS	STONE	85892		Inherited	No loan
27603	Classical Armenian	Indo-European	36000	Dead (well documented)	Medieval	haw	bird; bird; rooster, hen		Farm animals	POULTRY	HEN	60054		Inherited	No loan
63315	Classical Armenian	Indo-European	36000	Dead (well documented)	Medieval	inj	leopard, panther; generic big cat		Wild animals	PREDATOR ANIMALS	LEOPARD	63313		Inherited	No loan
63537	Classical Armenian	Indo-European	36000	Dead (well documented)	Medieval	ariwc	lion		Wild animals	PREDATOR ANIMALS	LION	63535		Inherited	No loan
63630	Classical Armenian	Indo-European	36000	Dead (well documented)	Medieval	*lusan-n, *lusamn, *luseamn	lynx; hyena; marten		Wild animals	PREDATOR ANIMALS	LYNX	63563		Unspecified	No loan
65002	Classical Armenian	Indo-European	36000	Dead (well documented)	Medieval	awj	snake		Wild animals	PREDATOR ANIMALS	SNAKE	64881		Inherited	No loan
64914	Classical Armenian	Indo-European	36000	Dead (well documented)	Medieval	iž	viper, snake		Wild animals	PREDATOR ANIMALS	SNAKE	64881		Inherited	No loan
66176	Classical Armenian	Indo-European	36000	Dead (well documented)	Medieval	arcui	eagle		Wild animals	PREDATOR BIRDS	EAGLE	66173		Inherited	No loan
66175	Classical Armenian	Indo-European	36000	Dead (well documented)	Medieval	arciw	eagle		Wild animals	PREDATOR BIRDS	EAGLE	66173		Unspecified	No loan
65632	Classical Armenian	Indo-European	36000	Dead (well documented)	Medieval	agṙaw	raven; raven, crow; the constellation Corvus		Wild animals	PREDATOR BIRDS	RAVEN	65630		Inherited	No loan
68812	Classical Armenian	Indo-European	36000	Dead (well documented)	Medieval	mełr	honey		Products	PRODUCTS	HONEY	61480		Inherited	No loan
69069	Classical Armenian	Indo-European	36000	Dead (well documented)	Medieval	kat'n	milk		Products	PRODUCTS	MILK	59858		Inherited	No loan
70134	Classical Armenian	Indo-European	36000	Dead (well documented)	Medieval	mom	wax; candle		Products	PRODUCTS	WAX (BEES)	70132		Certainly borrowed	Loan	Middle Persian
43850	Classical Armenian	Indo-European	36000	Dead (well documented)	Medieval	geɫmn, geɫman	wool, fleece		Products	PRODUCTS	WOOL	67489		Inherited	No loan
67911	Classical Armenian	Indo-European	36000	Dead (well documented)	Medieval	burd	wool		Products	PRODUCTS	WOOL	67909		Unspecified	No loan
82747	Classical Armenian	Indo-European	36000	Dead (well documented)	Medieval	amaṙn	summer		Seasons	SEASONS	SUMMER	82665		Inherited	No loan
82108	Classical Armenian	Indo-European	36000	Dead (well documented)	Medieval	jmer̄n	winter		Seasons	SEASONS	WINTER	81897		Inherited	No loan
58471	Classical Armenian	Indo-European	36000	Dead (well documented)	Medieval	gaṙn	lamb		Farm animals	SMALL CATTLE	LAMB	58469		Inherited	No loan
58192	Classical Armenian	Indo-European	36000	Dead (well documented)	Medieval	aṙn	wild ram		Farm animals	SMALL CATTLE	RAM	55089		Inherited	No loan
57683	Classical Armenian	Indo-European	36000	Dead (well documented)	Medieval	art	field		Farm animals	SMALL CATTLE	SHEEP	57679		Inherited	No loan
57682	Classical Armenian	Indo-European	36000	Dead (well documented)	Medieval	arti, artik	wild sheep		Farm animals	SMALL CATTLE	SHEEP	57679		Derivation	No loan
59005	Classical Armenian	Indo-European	36000	Dead (well documented)	Medieval	ul	kid, young of the goat		Farm animals	SMALL CATTLE	KID	59003		Unspecified	No loan
59058	Classical Armenian	Indo-European	36000	Dead (well documented)	Medieval	am	year		Farm animals	SMALL CATTLE	KID	59054		Inherited	No loan
59057	Classical Armenian	Indo-European	36000	Dead (well documented)	Medieval	amik, amlik	one-year-old male kid or lamb		Farm animals	SMALL CATTLE	KID	59054		Derivation	No loan
81512	Classical Armenian	Indo-European	36000	Dead (well documented)	Medieval	and	cornfield, arable field; pastureland (dial.); estate		Cultural artefacts & tools	TILLAGE	CULTIVATED FIELD	81511		Inherited	No loan
43534	Classical Armenian	Indo-European	36000	Dead (well documented)	Medieval	hacʿi	ash tree		Trees	TREES	ASH	43525		Inherited	No loan
43577	Classical Armenian	Indo-European	36000	Dead (well documented)	Medieval	t'ełi	elm tree		Trees	TREES	ELM			Uncertain origin	No loan
75608	Classical Armenian	Indo-European	36000	Dead (well documented)	Medieval	xncor	apple		Crops & fruit	VEGETABLES & FRUIT	APPLE	75606		Probably borrowed	Loan	Hurrian/Urartian
75608	Classical Armenian	Indo-European	36000	Dead (well documented)	Medieval	xncor	apple		Crops & fruit	VEGETABLES & FRUIT	APPLE	75606		Unspecified	Loan	Hurrian/Urartian
72597	Classical Greek	Indo-European	43000	Dead (well documented)	Ancient	ἀρόω	to plow, plant; to plow, plant; to plow, plant	v	Activities	ACTIVITIES	TO PLOW	72491		Inherited	No loan
72641	Classical Greek	Indo-European	43000	Dead (well documented)	Ancient	νεάω	to plow fallow land	v	Activities	ACTIVITIES	TO PLOW	72640		Unspecified	No loan
72820	Classical Greek	Indo-European	43000	Dead (well documented)	Ancient	τρέπω	to turn	v	Activities	ACTIVITIES	TO PLOW	72817		Inherited	No loan
72213	Classical Greek	Indo-European	43000	Dead (well documented)	Ancient	ῥάπτω	to sew; to sew (together), stitch, instigate [RB]	v	Activities	ACTIVITIES	TO SEW	72211		Inherited	No loan
72827	Classical Greek	Indo-European	43000	Dead (well documented)	Ancient	σπείρω	to sow, to seed; to spread, scatter, distribute	v	Activities	ACTIVITIES	TO SOW	72826		Inherited	No loan
71877	Classical Greek	Indo-European	43000	Dead (well documented)	Ancient	νέω	to spin; to spin, to weave	v	Activities	ACTIVITIES	TO SPIN (THREAD)	71823		Inherited	No loan
71920	Classical Greek	Indo-European	43000	Dead (well documented)	Ancient	τείνω	to stretch, draw, pull tight	v	Activities	ACTIVITIES	TO SPIN (THREAD)	71919		Inherited	No loan
72155	Classical Greek	Indo-European	43000	Dead (well documented)	Ancient	ἄτρακτος	spindle; arrow	m,f	Activities	ACTIVITIES	TO SPIN (THREAD)	72109		Inherited	No loan
71519	Classical Greek	Indo-European	43000	Dead (well documented)	Ancient	ὑϕή	web; fabric	f	Activities	ACTIVITIES	TO WEAVE	71432		Unspecified	No loan
71520	Classical Greek	Indo-European	43000	Dead (well documented)	Ancient	ὕϕος	fabric	n	Activities	ACTIVITIES	TO WEAVE	71432		Unspecified	No loan
71515	Classical Greek	Indo-European	43000	Dead (well documented)	Ancient	ὑφαίνω	to weave, warp, devise, produce	v	Activities	ACTIVITIES	TO WEAVE	71432		Inherited	No loan
[truncated: 13,015 more rows]
