# Supplementary material for: The causality of borrowing: Lexical loans in Eurasian languages
Source: PLoS One. 2019 Oct 30;14(10):e0223588. doi: 10.1371/journal.pone.0223588 (PMC6821065; doi:10.1371/journal.pone.0223588)
Supplement: S4 Appendix — (XLSX) [file pone.0223588.s004.xlsx]

## Sheet: Blad1
Language	Population_size	Economic_power	Economic_Power_Historical	Colonization	Colonization_Historical	Literary_power	Literary_Power_Historical	Prehistoric_extension	Mean_value
Abaza	1	1		1		1			1
Abkhaz	1	1		1		1			1
Adyghe	1	1		1		1			1
Afro-Asiatic (family)								5	5
Aghul	1	1		1		1			1
Akkadian			4		4		4		4
Albanian (Tosk)	2	2		2		2			2
Andi	1	1		1		1			1
Anglo-Norman			4		4		3		3.66667
Arabic	5		5	5		3			4.5
Armenian	2		2	2		2			2
Avar	1	1		1		1			1
Avestan			3		3		4		3.3
Azerbaijani	3	2		3		2			2.5
Baltic (branch)								4	4
Basque	1	1		1		2			1.25
Basque (West)	1	1		1		2			1.25
Batsbi	1	1		1		1			1
Bengali	5	4		3		3			3.75
Beshta	1	1		1		1			1
Breton	1	1		1		1			1
Buddhist Hybrid Sanskrit			3		3		4		3.33333
Budukh	1	1		1		1			1
Bulgarian	2	1		3		2			2
Catalan	2	2		2		3			2.25
Celtic (branch)								4	4
Chechen	2	1		1		1			1.2
Circassian (branch)								3	3
Classical Armenian			3		2		2		2.33333
Classical Greek			5		5		5		5
Cornish	1	1		1		1			1
Crimean Tatar	1	1		1		1			1
Croatian	2			2		2			2
Czech	3	2		2		2			2.25
Danish	2	3		3		3			2.75
Dargwa	1	1		1		1			1
Dutch	3	4		4		3			3.5
Elfdalian	1	1		1		1			1
English	5	5		5		5			5
Estonian	2	2		1		2			1.75
Faroese	1	1		1		1			1
Finnic (branch)								4	4
Finnish	2	2		2		2			2
Finno-Ugric (branch)								4	4
French	4	5		5		4			4.5
Frisian	1	2		1		1			1.2
Friulian	1	1		1		1			1
Gagauz	1	1		1		1			1
Gaulish			4		4		2		3.33333
Georgian	2	2		2		1			1.75
German	4	5		4		4			4.25
Germanic (branch)								4	4
Gothic		4			4		2		3.33333
Greek	3	2			2	2			2.25
Hattic			1		1		1		1
Hindi	5	4		3		3			3.75
Hittite		5		4		5			4.6
Hungarian	3	2		2		3			2.5
Hurrian/Urartian			1		1		1		1
Icelandic	1	1		1		1			1
Indo-European (family)								5	5
Indo-Iranian (branch)								4	4
Ingush	1	1		1		1			1
Iranian (branch)								4	4
Irish	1	1		1		1			1
Italian	4	5		3		3			3.75
Kabardian	2	1		1		1			1.25
Kazakh	1	1		1		1			1
Khinalug	1	1		1		1			1
Khotanese			2		2		2		2
Khwarshi	1	1		1		1			1
Kryz	1	1		1		1			1
Kumuk	1	1		1		1			1
Kurdish (Kurmanji)	3	1		1		1			1.5
Kurdish (Sorani)	2	1		1		1			1.25
Lak	1	1		1		1			1
Late Latin			4		4		4		4
Latin			5		5		5		5
Latvian	2	1		1		2			1.5
Lezgian	1	1		1		1			1
Lithuanian	2	1		1		2			1.5
Low German	2	2		1		1			1.5
Luwian			3		3		3		3
Medieval Latin			4		4		4		4
Megrelian	1		1		1	1			1
Messapian			1		1		1		1
Middle Breton			2		1	3			2
Middle Dutch			4		3	3			3.33333
Middle English			3		3	3			3
Middle French			4		3	3			3.33333
Middle Greek			3		3	3			3
Middle High German			4		3	4			3.66667
Middle Irish			2		2	3			2.33333
Middle Low German			4		4	3			3.66667
Middle Persian			3		3		3		3
Middle Welsh					2	3			2.5
Modern Armenian	2	2		1		2			1.75
Modern Greek	3	2			2	2			2.25
Mongolian	3	2		1		1			1.75
Northern Saami	1	1			1	1			1
Norwegian (Bokmål)	2	3			2	3			2.5
Norwegian (Nynorsk)	2	3			2	3			2.5
Occitan	1	1			1	1			1
Old Breton			2		2		3		2.33333
Old Catalan			3		3		3		3
Old Chinese			4		4		4		4
Old Church Slavonic			3		3		3		3
Old Cornish			2		2		2		2
Old Danish			3		3		3		3
Old English			3		3		4		3.33333
Old Franconian			2		3		3		2.66667
Old French			4		4		4		4
Old Frisian			3		3		3		3
Old Gutnish			2		2		2		2
Old High German			3		3		3		3
Old Irish			3		3		4		3.33333
Old Italian			4		3		3		3.33333
Old Norse			4		4		3		3.66667
Old Provençal			2		2		3		2.33333
Old Prussian			2		3		3		2.66667
Old Russian			3		3		2		2.66667
Old Saxon			3		3		3		3
Old Spanish			3		3		4		3.33333
Old Swedish			3		3		3		3
Old Testament Hebrew			3		3		4		3.33333
Old Turkic			3		4		2		3
Ossetian (Iron)	1	1		1			1		1
Persian	4	3		3		2			3
Phoenician			4		4		3		3.66667
Polish	4	4		2		2			3
Portuguese	5	4		5		3			4.25
Proto-Celtic								4	4
Proto-Gallo-Romance								3	3
Proto-Germanic								4	4
Proto-Romance								4	4
Proto-Slavic								4	4
Provençal	1	1		1		1			1
Punjabi	5	2		3		1			2.75
Romance (branch)								4	4
Romanian	3	2		3		2			2.5
Russian	5	5		5		5			5
Rutul	1	1		1		1			1
Sanskrit			4		4		5		4.33333
Sardinian	2	1		1		1			1.25
Scandinavian (branch)								4	4
Scottish Gaelic	1	1		1		1			1
Semitic (family)								5	5
Serbian	3	2		3		2			2.5
Serbo-Croatian	3	2		3		2			2.5
Slavic (branch)								4	4
Slovene	2	2		2		2			2
Southern Altai	1	1		1		1			1
Spanish	5	5		5		4			4.75
Standard Arabic	5		5	5		3			4.5
Svan	1			1		1			1
Swedish	2	3		3		3			2.75
Tabasaran	1	1		1		1			1
Thracian			2		2		1		1.66667
Tocharian A			2	2				2	2
Tocharian B			3		2		3		2.66667
Tsakhur	1	2		1		1			1.25
Turkic (family)								5	5
Turkish	4	4		4			2		3.5
Turkmen	2	2		1		1			1.5
Tuvan	1	1		1		1			1
Ubykh			1	1		1			1
Udi	1	1		1		1			1
Ugaritic			2	2				2	2
Ukranian	4	2		2		2	2		2.5
Walloon	1	1		1		1	1		1
Welsh	1	1		1		1	1		1
Vulgar Latin			4	4				4	4
